# Supplementary material for: Treatment and outcome of Ganglioneuroma and Ganglioneuroblastoma intermixed
Source: PubMed Central journal article supplement (PMC4964292; doi:10.1186/s12885-016-2513-9), 2016-07-27
Supplement: 12885_2016_2513_MOESM1_ESM.pdf [file 12885_2016_2513_MOESM1_ESM.pdf]

| Gruppe      | PAT_ALTER | STADIUM | REMDAU | UEBDAU | STATUS | EVENT_ART | LOH | NMYC | MinvonTUM | MaxvonINTR | TU_HOCH |
|-------------|-----------|---------|--------|--------|--------|-----------|-----|------|-----------|------------|---------|
| GN mature   | 3697      | 3       | 604    | 604    | 0      |           |     |      | 1 4       | 1          | 4,9     |
| GN mature   | 3591      | 1       | 374    | 374    | 0      |           |     |      | 3         |            | 4       |
| GN mature   | 3955      | 1       | 80     | 80     | 0      |           |     | -1   | -1 3      |            | 5,9     |
| GN mature   | 3895      | 1       | 310    | 310    | 0      |           |     |      | 4         |            | 8       |
| GN mature   | 4626      | 2,1     | 153    | 153    | 0      |           |     | 2    | 1 4       |            | 13,5    |
| GN mature   | 1156      | 0       | 53     | 53     | 0      |           |     | 2    | 1 0       |            |         |
| GN mature   | 2724      | 3       | 2874   | 2874   | 0      |           |     |      | 1 4       |            | 4       |
| GN mature   | 5133      | 3       | 331    | 331    | 0      |           |     |      | 6         | 1          | 10      |
| GN mature   | 4603      | 3       | 813    | 2495   | 2 4    |           |     |      | 1 3       |            | 8       |
| GN mature   | 5154      | 1       | 522    | 522    | 0      |           |     |      | 1 3       |            | 6       |
| GN mature   | 4835      | 1       | 887    | 887    | 0      |           |     |      | 1         |            | 3,5     |
| GN mature   | 2830      | 1       | 1450   | 1450   | 0      |           |     |      | 3         |            | 3       |
| GN mature   | 3522      | 1       | 1839   | 1839   | 0      |           |     |      | 1         |            | 7,8     |
| GN mature   | 1675      | 1       | 1620   | 1620   | 0      |           |     |      | 4         |            |         |
| GN mature   | 1482      | 1       | 1161   | 1161   | 0      |           |     |      | 3         |            | 8,4     |
| GN mature   | 840       | 3       | 1583   | 1583   | 0      |           |     |      | 1 6       |            | 7       |
| GN mature   | 3985      | 1       | 734    | 734    | 0      |           |     | -1   | -1 1      |            | 11,6    |
| GN mature   | 5260      | 2,1     | 1117   | 1117   | 0      |           |     | 2    | 1 3       |            | 9,9     |
| GN maturing | 2124      | 3       | 552    | 552    | 0      |           |     | 2    | 1 1       |            | 11,7    |
| GN maturing | 900       | 1       | 73     | 73     | 0      |           |     |      | 1 1       |            | 3       |
| GN maturing | 2124      | 1       | 453    | 453    | 0      |           |     |      | 6         |            | 6,3     |
| GN maturing | 1944      | 3       | 339    | 339    | 0      |           |     | 2    | 1 3       | 1          | 5       |
| GN maturing | 1420      | 1       | 384    | 384    | 0      |           |     | 2    | 1 6       |            | 4,5     |
| GN maturing | 1659      | -3      | 81     | 81     | 0      |           |     | -1   | -1 3      |            | 3,8     |
| GN maturing | 4102      | 1       | 67     | 67     | 0      |           |     |      | 1 1       |            | 6,4     |
| GN maturing | 1406      | 1       | 442    | 442    | 0      |           |     |      | 1 1       |            |         |
| GN maturing | 2815      | 2,1     | 131    | 131    | 0      |           |     |      | 4         |            | 3,5     |
| GN maturing | 5704      | 2,1     | 385    | 385    | 0      |           |     |      | 3         |            | 3,5     |
| GN maturing | 1951      | 1       | 153    | 153    | 0      |           |     |      | 1 4       |            | 2       |
| GN maturing | 3395      | 2,1     | 1619   | 1619   | 0      |           |     | 2    | 1 4       |            | 10      |
| GN maturing | 1669      | 1       | 1806   | 1806   | 0      |           |     | 2    | 1 1       |            | 4,5     |
| GN maturing | 2922      | 1       | 425    | 425    | 0      |           |     |      | 1 1       |            | 4,7     |
| GN maturing | 3176      | 2,1     | 2886   | 2886   | 0      |           |     |      | 1 1       |            | 5       |
| GN maturing | 1328      | 1       | 2409   | 2409   | 0      |           |     | 2    | 1 3       |            | 6,2     |
| GN maturing | 3961      | 3       | 3331   | 3331   | 0      |           |     | 2    | 1 4       |            |         |
| GN maturing | 1500      | 1       | 2352   | 2352   | 0      |           |     |      | 3         |            | 3,8     |
| GN maturing | 3042      | 1       | 26     | 26     | 0      |           |     |      | 1         |            | 2,1     |
| GN maturing | 3438      | 1       | 105    | 105    | 0      |           |     | 2    | 1 4       |            | 5,9     |
| GN maturing | 2064      | 1       | 1913   | 1913   | 0      |           |     |      | 4         |            | 14      |
| GN maturing | 1389      | 1       | 1997   | 1997   | 0      |           |     |      | 1 1       |            | 6       |
| GN maturing | 4108      | 2,1     | 2211   | 2211   | 0      |           |     |      | 1 4       |            | 3,5     |
| GN maturing | 1317      | 1       | 2435   | 2435   | 0      |           |     |      | 5         |            | 3,2     |

|             |          |      |      |     |    |      |   |      |
|-------------|----------|------|------|-----|----|------|---|------|
| GN maturing | 5918 1   | 800  | 800  | 0   |    | 1    |   |      |
| GN maturing | 2121 1   | 3413 | 3413 | 0   |    | 3    |   | 4,6  |
| GN maturing | 1522 1   | 3219 | 3219 | 0   | 2  | 1 3  |   | 3    |
| GN maturing | 3408 1   | 3415 | 3415 | 0   |    | 3    |   | 3,1  |
| GN maturing | 4009 1   | 2708 | 2708 | 0   |    | 3    |   | 10   |
| GN maturing | 3114 1   | 994  | 994  | 0   |    | 1    |   | 3,8  |
| GN maturing | 4362 1   | 1580 | 1580 | 0   |    | 1 3  |   | 8    |
| GN maturing | 4095 1   | 2118 | 2118 | 0   |    | 1 3  |   | 8    |
| GN maturing | 1934 1   | 1995 | 1995 | 0   |    | 1 6  |   |      |
| GN maturing | 1827 2,1 | 54   | 54   | 0   | 2  | 1 4  |   | 4,9  |
| GN maturing | 1925 1   | 2811 | 2811 | 0   |    | -1 3 |   | 8    |
| GN maturing | 3507 1   | 1988 | 1988 | 0   |    | 3    |   | 4    |
| GN maturing | 2008 1   | 2871 | 2871 | 0   |    | 1 5  |   | 4,8  |
| GN maturing | 4847 1   | 2295 | 2295 | 0   |    | 1 1  |   |      |
| GN maturing | 2062 1   | 1845 | 1845 | 0   |    | 1 1  |   | 10,8 |
| GN maturing | 3064 -1  | 1361 | 1361 | 0 0 |    | 1 4  | 1 | 9,5  |
| GN maturing | 1596 1   | 1938 | 1938 | 0   |    | 1 1  |   | 3,6  |
| GN maturing | 975 1    | 2478 | 2478 | 0   |    | 1 1  |   | 1,5  |
| GN maturing | 3652 1   | 321  | 321  | 0   |    | 6    |   | 11   |
| GN maturing | 1082 2,2 | 2733 | 2733 | 0   |    | 1 4  |   |      |
| GN maturing | 1638 1   | 146  | 146  | 0   |    | 1 4  |   |      |
| GN maturing | 4627 1   | 2960 | 2960 | 0 0 | -1 | 1 3  |   | 6,3  |
| GN maturing | 1360 1   | 2322 | 2322 | 0   | -1 | 4    |   | 2,2  |
| GN maturing | 3355 2,1 | 776  | 776  | 0   |    | 1 4  | 1 | 9,5  |
| GN maturing | 2319 1   | 2947 | 2947 | 0   |    | 1    |   | 5    |
| GN maturing | 3181 -2  | 937  | 937  | 0   |    | 1 4  |   | 8    |
| GN maturing | 3518 1   | 848  | 848  | 0   |    | 1    |   | 6,3  |
| GN maturing | 4494 1   | 2386 | 2386 | 0   |    | 1 1  |   | 3,6  |
| GN maturing | 1296 1   | 281  | 281  | 0   | 2  | 1 1  |   | 1,6  |
| GN maturing | 3027 1   | 2259 | 2259 | 0   | -1 | 1    |   | 8    |
| GN maturing | 1372 0   | 7    | 7    | 0   |    | 6    | 1 |      |
| GN maturing | 956 1    | 2180 | 2180 | 0   |    | 1 3  |   | 2,5  |
| GN maturing | 3551 1   | 1799 | 1799 | 0   |    | 1 3  |   | 1,8  |
| GN maturing | 5103 1   | 1577 | 1577 | 0   |    | 1    |   | 6    |
| GN maturing | 4803 1   | 2179 | 2179 | 0   |    | 1 1  |   | 6    |
| GN maturing | 1567 1   | 248  | 248  | 0   |    | 1 3  |   | 3    |
| GN maturing | 2659 1   | 2296 | 2296 | 0   |    | 1    |   | 3,5  |
| GN maturing | 1354 1   | 1150 | 1150 | 0 0 |    | 1 1  |   | 3    |
| GN maturing | 2106 -1  | 1937 | 1937 | 0 0 | 2  | 1 4  |   | 6,9  |
| GN maturing | 3805 1   | 1878 | 1878 | 0   |    | 1    |   | 9,5  |
| GN maturing | 3015 1   | 1134 | 1134 | 0 0 |    | 3    |   | 7,2  |
| GN maturing | 2693 1   | 2051 | 2051 | 0   | 2  | 1 4  |   | 4,5  |
| GN maturing | 1840 1   | 2541 | 2541 | 0   |    | 3    |   | 5,1  |

|             |           |      |      |     |    |      |   |     |
|-------------|-----------|------|------|-----|----|------|---|-----|
| GN maturing | 4640 2,1  | 1344 | 1344 | 0   |    | 1    |   | 7   |
| GN maturing | 1921 2    | 2023 | 2023 | 0   |    | 1    | 1 | 3,6 |
| GN maturing | 590 1     | 1238 | 1238 | 0   | 2  | 1 5  |   | 2,2 |
| GN maturing | 2864 1    | 2387 | 2387 | 0   |    | 1 3  |   | 8   |
| GN maturing | 1294 1    | 2620 | 2620 | 0   | 2  | 1 1  |   | 3   |
| GN maturing | 2087 1    | 2934 | 2934 | 0 0 | -1 | -1 5 |   | 3   |
| GN maturing | 2798 2,1  | 2096 | 2096 | 0   |    | 1 3  |   | 4,1 |
| GN maturing | 1201 1    | 1532 | 1532 | 0   |    | 1 3  |   | 4,8 |
| GN maturing | 3747 1    | 2401 | 2401 | 0   | -1 | -1 3 |   | 4   |
| GN maturing | 5398 1    | 456  | 456  | 0   |    | 1    |   | 5   |
| GN maturing | 2002 1    | 2012 | 2012 | 0 0 | 2  | 1 1  |   | 2,6 |
| GN maturing | 3362 3    | 1912 | 1912 | 0   |    | 1 4  | 1 |     |
| GN maturing | 1801 3    | 1717 | 1717 | 0   |    | 1 3  | 1 |     |
| GN maturing | 3435 1    | 930  | 930  | 0   |    | 1 3  |   | 3,9 |
| GN maturing | 4881 1    | 1587 | 1587 | 0   |    | 1 1  |   | 5   |
| GN maturing | 2815 1    | 2106 | 2106 | 0   |    | 3    |   | 4   |
| GN maturing | 1039 2,1  | 2154 | 2154 | 0   |    | 5    | 1 | 2,4 |
| GN maturing | 3922 1    | 805  | 805  | 0   |    | 4    |   | 3   |
| GN maturing | 1342 1    | 532  | 532  | 0   |    | 1 4  |   | 6   |
| GN maturing | 2203 1    | 2085 | 2085 | 0   |    | 1 3  |   | 3,3 |
| GN maturing | 5605 1    | 804  | 804  | 0   |    | 1 1  |   | 6   |
| GN maturing | 4766 1    | 891  | 891  | 0   |    | 1    |   | 9   |
| GN maturing | 1695 -2,2 | 2022 | 2022 | 0   |    | 1 1  |   | 8   |
| GN maturing | 1523 1    | 24   | 24   | 1   |    | 1    |   | 10  |
| GN maturing | 2434 2,1  | 1812 | 1812 | 0   |    | 4    |   |     |
| GN maturing | 5159 1    | 1741 | 1741 | 0   |    | -1 4 |   | 5   |
| GN maturing | 2790 1    | 1445 | 1445 | 0   |    | 3    |   | 4   |
| GN maturing | 6074 1    | 692  | 692  | 0   |    | 1    |   | 5,3 |
| GN maturing | 1858 1    | 104  | 104  | 0   | 2  | 1 3  |   | 2,5 |
| GN maturing | 1580 2,1  | 1737 | 1737 | 0   |    | 1 4  | 1 |     |
| GN maturing | 2772 1    | 1726 | 1726 | 0   |    | 4    |   | 10  |
| GN maturing | 1344 -2,1 | 35   | 35   | 0   |    | 3    |   |     |
| GN maturing | 3367 1    | 1270 | 1270 | 0   |    | 1 1  |   |     |
| GN maturing | 4824 3    | 1819 | 1819 | 0   |    | -1 3 | 1 | 9,5 |
| GN maturing | 3408 1    | 1354 | 1354 | 0   |    | 1 4  |   | 7   |
| GN maturing | 1612 1    | 1548 | 1548 | 0   | 2  | 1 3  |   | 8   |
| GN maturing | 1775 2,1  | 1634 | 1634 | 0   |    | 4    |   |     |
| GN maturing | 1468 3    | 1435 | 1435 | 0   | 2  | 1 3  |   | 9,4 |
| GN maturing | 6498 1    | 1525 | 1525 | 0   |    | 1    |   | 4   |
| GN maturing | 1535 2,1  | 1253 | 1472 | 2 4 |    | 3    |   | 7,5 |
| GN maturing | 2024 3    | 1113 | 1113 | 0   |    | 6    |   | 3   |
| GN maturing | 681 1     | 1678 | 1678 | 0   |    | 1    |   | 5,6 |
| GN maturing | 1050 1    | 1451 | 1451 | 0   |    | 3    |   | 6   |

|             |          |      |      |     |    |     |   |      |
|-------------|----------|------|------|-----|----|-----|---|------|
| GN maturing | 1349 1   | 1132 | 1132 | 0   |    | 6   |   | 1,8  |
| GN maturing | 4844 1   | 299  | 299  | 0   |    | 1   |   | 3,1  |
| GN maturing | 4667 2,1 | 1424 | 1424 | 0   |    | 3   |   |      |
| GN maturing | 2840 2,1 | 1532 | 1532 | 0   |    | 3   |   | 4    |
| GN maturing | 1483 1   | 1437 | 1437 | 0   | 2  | 1 1 |   | 3,8  |
| GN maturing | 1215 3   | 1417 | 1417 | 0   | 2  | 1 3 |   | 4    |
| GN maturing | 2789 1   | 902  | 902  | 0   | -1 | 1 3 |   | 7,5  |
| GN maturing | 5287 2   | 1299 | 1299 | 0 0 |    | 1   |   |      |
| GN maturing | 2083 1   | 1193 | 1193 | 0   | 2  | 1 1 |   | 2,5  |
| GN maturing | 1494 1   | 1067 | 1067 | 0   | 2  | 1 3 |   | 4    |
| GN maturing | 3053 2,1 | 1314 | 1314 | 0 0 | 2  | 1 1 |   | 9    |
| GN maturing | 2193 1   | 389  | 389  | 0   |    | 6   |   | 24,4 |
| GN maturing | 2081 1   | 643  | 643  | 0   |    | 1 4 |   | 5    |
| GN maturing | 4453 1   | 929  | 929  | 0   |    | 3   |   | 4    |
| GN maturing | 1446 1   | 1237 | 1237 | 0   |    | 5   |   | 2    |
| GN maturing | 1417 2,1 | 1092 | 1092 | 0   | 2  | 1 4 |   | 3,5  |
| GN maturing | 1614 1   | 683  | 683  | 0   | 2  | 1 1 |   |      |
| GN maturing | 2888 1   | 947  | 947  | 0   |    | 1 3 | 1 | 4,1  |
| GN maturing | 309 3    | 1096 | 1096 | 0   | -1 | 1 4 | 1 | 1,9  |
| GN maturing | 1779 1   | 579  | 579  | 0   |    | 1 1 |   | 10   |
| GN maturing | 2954 1   | 901  | 901  | 0   |    | 3   |   |      |
| GN maturing | 1333 1   | 677  | 677  | 0   | -1 | 1 4 |   | 10   |
| GN maturing | 4860 2,1 | 798  | 798  | 0   |    | 6   | 1 | 8    |
| GN maturing | 4004 1   | 894  | 894  | 0   |    | 1 3 |   | 9    |
| GN maturing | 1097 3   | 950  | 950  | 0   | -1 | 1 4 |   | 2    |
| GN maturing | 2083 3   | 763  | 763  | 0 0 |    | 1 3 | 0 |      |
| GN maturing | 1982 1   | 771  | 771  | 0   |    | 1 1 |   | 8,5  |
| GN maturing | 2960 2,1 | 899  | 899  | 0   |    | 4   |   | 4,2  |
| GN maturing | 2613 1   | 420  | 420  | 0   | -1 | 1 1 |   | 7    |
| GN maturing | 2723 2,1 | 671  | 671  | 0   | 2  | 1 3 |   | 3    |
| GN maturing | 1109 1   | 513  | 513  | 0   | 2  | 1 6 | 1 | 6,3  |
| GN maturing | 775 1    | 785  | 785  | 0   | -1 | 1 3 |   | 4,9  |
| GN maturing | 1146 1   | 75   | 75   | 0   |    | 3   |   | 2,3  |
| GN maturing | 3243 2,1 | 853  | 853  | 0   |    | 4   |   | 2,3  |
| GNBI        | 1319 1   | 586  | 586  | 0   | -1 | 1 4 |   | 2,2  |
| GNBI        | 768 1    | 396  | 396  | 0   | 2  | 1 4 |   | 1    |
| GNBI        | 2895 1   | 444  | 444  | 0 0 |    | 1 1 |   | 4    |
| GNBI        | 2931 2,1 | 483  | 483  | 0   | 2  | 1 4 | 1 | 8,6  |
| GNBI        | 974 -2,2 | 409  | 409  | 0   | 2  | 1 4 |   | 2,6  |
| GNBI        | 2121 1   | 308  | 308  | 0   |    | 1 3 |   | 11   |
| GNBI        | 1638 2,1 | 4073 | 4073 | 0   |    | 1 3 |   | 4,3  |
| GNBI        | 958 1    | 2587 | 2587 | 0   | 2  | 1 1 |   | 3,2  |
| GNBI        | 1065 1   | 3549 | 3549 | 0   |    | 1 1 |   | 2,3  |

|      |          |      |      |     |     |      |   |      |
|------|----------|------|------|-----|-----|------|---|------|
| GNBI | 521 1    | 119  | 119  | 1   | 2   | 1 1  |   | 3,2  |
| GNBI | 4669 1   | 2083 | 2083 | 0   | -1  | 1 3  |   |      |
| GNBI | 2201 1   | 3356 | 3356 | 0   | 1,1 | 1 4  |   | 4,5  |
| GNBI | 1319 1   | 941  | 941  | 0   |     | 1 1  |   | 4    |
| GNBI | 1203 1   | 3485 | 3485 | 0   |     | 1 3  | 1 | 3,8  |
| GNBI | 1917 1   | 2146 | 2146 | 0   |     | 1 1  |   | 5,7  |
| GNBI | 7640 2,1 | 2470 | 2470 | 0   | 2   | 1 3  | 1 | 6    |
| GNBI | 1964 1   | 2457 | 2457 | 0   |     | 1 6  |   | 4,4  |
| GNBI | 936 1    | 1384 | 1384 | 0   | 2   | 1 4  |   | 7,5  |
| GNBI | 1602 2,1 | 1564 | 1564 | 0   |     | 1 4  |   |      |
| GNBI | 2477 1   | 3034 | 3034 | 0   |     | 1 1  |   | 8,2  |
| GNBI | 2364 1   | 3085 | 3085 | 0   |     | 1 3  |   |      |
| GNBI | 589 2,1  | 2893 | 2893 | 0   |     | 1 5  |   | 2,5  |
| GNBI | 3058 1   | 12   | 12   | 0   |     | 1 4  |   |      |
| GNBI | 2022 2,1 | 3046 | 3046 | 0   | 2   | 1 4  | 1 | 4    |
| GNBI | 1265 2,1 | 818  | 818  | 0   |     | 1 5  |   |      |
| GNBI | 455 1    | 3016 | 3016 | 0   | -1  | 1 6  |   | 3    |
| GNBI | 1894 2,1 | 174  | 174  | 0   |     | 1 6  |   | 4    |
| GNBI | 1310 1   | 2689 | 2689 | 0   | -1  | 1 3  |   | 15,5 |
| GNBI | 2036 2,1 | 2668 | 2668 | 0   | 2   | 1 1  |   | 4,4  |
| GNBI | 1824 1   | 2891 | 2891 | 0   |     | 1    |   | 5,5  |
| GNBI | 3182 1   | 2665 | 2665 | 0   |     | 1 4  |   |      |
| GNBI | 2249 1   | 1886 | 1886 | 0   | 2   | 1 1  |   | 6    |
| GNBI | 2931 2,1 | 2461 | 2461 | 0   |     | 1 3  | 1 |      |
| GNBI | 3788 1   | 2369 | 2369 | 0   |     | 1 3  |   |      |
| GNBI | 2577 1   | 2227 | 2227 | 0   | 2   | 1 4  |   | 3    |
| GNBI | 957 2,1  | 2424 | 2468 | 2 4 | 2   | 1 4  |   | 3,8  |
| GNBI | 1860 1   | 2325 | 2325 | 0   |     | 1 1  |   | 3,3  |
| GNBI | 3128 1   | 2219 | 2219 | 0   | -1  | -1 5 |   | 2    |
| GNBI | 1007 1   | 378  | 378  | 0 0 | 2   | 1 1  |   | 2,5  |
| GNBI | 700 1    | 1707 | 1707 | 0 0 | 2   | 1 1  |   | 2    |
| GNBI | 3465 1   | 1963 | 1963 | 0 0 | 2   | 1 3  |   | 8    |
| GNBI | 1976 1   | 1757 | 1757 | 0   | 2   | 1 3  |   |      |
| GNBI | 1191 3   | 1829 | 1829 | 0   |     | 1 3  |   | 8    |
| GNBI | 1513 2,1 | 1613 | 1613 | 0   | 2   | 1 3  |   | 3,5  |
| GNBI | 549 -2,1 | 1808 | 1808 | 0   | 2   | 1 6  | 1 | 4,3  |
| GNBI | 3776 1   | 1093 | 1093 | 0   |     | 1 4  |   | 3,6  |
| GNBI | 1285 3   | 95   | 1796 | 2 4 | 2   | 1 4  | 1 |      |
| GNBI | 887 2,1  | 1073 | 1073 | 0 0 | -1  | 1 3  | 1 | 7    |
| GNBI | 3570 2,1 | 1333 | 1333 | 0   | 2   | 1 4  |   | 4,6  |
| GNBI | 2973 1   | 761  | 761  | 0   | 2   | 1 3  |   | 3,7  |
| GNBI | 3699 1   | 989  | 989  | 0   |     | 1 3  |   | 7    |
| GNBI | 1491 3   | 349  | 349  | 0   | -1  | 1 1  | 1 | 13,1 |

|         |          |     |     |     |     |       |   |      |
|---------|----------|-----|-----|-----|-----|-------|---|------|
| GNBI    | 1309 1   | 873 | 873 | 0   | -1  | 1 4   |   | 6    |
| GNBI    | 2632 1   | 753 | 753 | 0 0 | 2   | 1 3   |   |      |
| GNBI    | 1271 3   | 655 | 655 | 0   | 2   | 1 1   |   | 5    |
| NB/GNBN | 123 2,1  | 799 | 799 | 0   | 2   | 1 1   |   | 2,5  |
| NB/GNBN | 451 2,2  | 697 | 697 | 0   | 2   | 1 4   |   | 4    |
| NB/GNBN | 657 1    | 687 | 687 | 0   | 2   | 1 1   |   | 2,5  |
| NB/GNBN | 531 1    | 340 | 340 | 0   | 2   | 1 6   |   | 1,4  |
| NB/GNBN | 191 3    | 569 | 569 | 0   | 2   | 1 3   | 1 | 3,4  |
| NB/GNBN | 323 3    | 780 | 780 | 0   | 2   | 1 5   |   |      |
| NB/GNBN | 1507 3   | 511 | 769 | 2 4 | 1,1 | 1 4   | 1 | 2,5  |
| NB/GNBN | 762 1    | 311 | 311 | 0   | 2   | 1 1   |   | 1,8  |
| NB/GNBN | 451 2,1  | 726 | 726 | 0   | 2   | 1 4   |   | 5    |
| NB/GNBN | 0 1      | 86  | 86  | 0   | 2   | 1 4   |   | 3    |
| NB/GNBN | 257 2    | 112 | 763 | 2 4 | 2   | 1 5   |   | 4,5  |
| NB/GNBN | 34 2,1   | 41  | 726 | 2 4 | 2   | 1 1   | 1 |      |
| NB/GNBN | 216 1    | 316 | 316 | 0   | 1,1 | 1 6   |   | 4,6  |
| NB/GNBN | 292 2,1  | 690 | 690 | 0   | 2   | 1 4   |   | 3,2  |
| NB/GNBN | 317 1    | 610 | 610 | 0   | 1,1 | 1 3   |   | 5,1  |
| NB/GNBN | 173 3    | 458 | 929 | 1 4 | 2   | 1 3   |   |      |
| NB/GNBN | 0 -2,1   | 199 | 199 | 0 0 | 2   | 1 1   |   | 2    |
| NB/GNBN | 396 2,2  | 409 | 409 | 0   | 2   | 1 3   |   | 4,3  |
| NB/GNBN | 133 2,2  | 264 | 264 | 0   | 2   | 1 3   |   | 3,1  |
| NB/GNBN | 61 1     | 450 | 450 | 0   | 2   | 1 1   |   | 2,2  |
| NB/GNBN | 383 3    | 417 | 417 | 0 0 | 2   | 1 6   | 1 |      |
| NB/GNBN | 87 2,1   | 280 | 676 | 2 2 | 2   | 1 4   | 1 | 2    |
| NB/GNBN | 58 2,1   | 628 | 628 | 0   | 2   | 1 6   |   | 4,7  |
| NB/GNBN | 1817 2,2 | 614 | 614 | 0   | 2   | 1 3   |   | 4,5  |
| NB/GNBN | 0 2,1    | 125 | 674 | 2 4 | 2   | 1 3   |   | 4,5  |
| NB/GNBN | 493 2,2  | 638 | 638 | 0   | 2   | 1 3   |   | 5,2  |
| NB/GNBN | 345 2,1  | 573 | 573 | 0   | 2   | 1 6   | 1 | 1,8  |
| NB/GNBN | 0 2,1    | 561 | 561 | 0   | 2   | 1 5   |   | 3    |
| NB/GNBN | 1117 1   | 221 | 221 | 0   | 2   | 1 1   |   |      |
| NB/GNBN | 231 3    | 550 | 550 | 0   | 2   | 1,5 3 | 1 | 7,2  |
| NB/GNBN | 210 1    | 477 | 477 | 0   | 4   | 15 1  |   | 2,5  |
| NB/GNBN | 713 3    | 258 | 258 | 0   | -1  | 100 1 |   |      |
| NB/GNBN | 555 2,1  | 326 | 326 | 0   | 2   | 1 4   |   | 3    |
| NB/GNBN | 564 1    | 246 | 246 | 0   | 2   | 1 3   |   | 3,2  |
| NB/GNBN | 429 3    | 376 | 376 | 0   | 2   | 1 3   | 1 |      |
| NB/GNBN | 21 3     | 297 | 583 | 2 4 | 1,1 | 1 6   |   | 7,1  |
| NB/GNBN | 1070 3   | 343 | 343 | 0   | 2   | 1,5 3 |   | 10,8 |
| NB/GNBN | 36 2,1   | 194 | 194 | 0   | 2   | 1 4   | 1 | 6    |
| NB/GNBN | 70 2,2   | 540 | 540 | 0   | 2   | 1 5   |   | 1,2  |
| NB/GNBN | 169 2,1  | 266 | 602 |     | 2   | 1 4   |   | 0,9  |

|         |         |      |      |     |     |      |   |     |
|---------|---------|------|------|-----|-----|------|---|-----|
| NB/GNBN | 47 2,1  | 34   | 34   | 0   | 2   | 1 3  | 1 | 2,4 |
| NB/GNBN | 594 1   | 15   | 15   | 0   | 2   | 1 1  |   | 3,7 |
| NB/GNBN | 598 2,2 | 350  | 350  | 0   | 2   | 1 1  |   |     |
| NB/GNBN | 1272 3  | 382  | 387  | 2 4 | 4   | 50 3 |   | 6,9 |
| NB/GNBN | 394 3   | 169  | 538  | 2 4 | 2   | 1 3  |   | 5,5 |
| NB/GNBN | 373 3   | 275  | 520  | 2 4 | 2   | 1 3  |   | 4,4 |
| NB/GNBN | 0 1     | 239  | 483  | 2 2 | 2   | 1 1  |   |     |
| NB/GNBN | 0 1     | 189  | 189  | 0   | 2   | 1 1  |   | 1,8 |
| NB/GNBN | 65 3    | 357  | 547  | 2 4 | -1  | -1 1 |   |     |
| NB/GNBN | 1676 1  | 3814 | 3814 | 0   |     | 1 4  | 1 | 2,1 |
| NB/GNBN | 371 1   | 3583 | 3583 | 0   | 1,1 | 1 1  |   |     |
| NB/GNBN | 374 2,1 | 134  | 3385 | 2 4 | 2   | 1 3  | 1 | 5,4 |
| NB/GNBN | 453 2,1 | 651  | 2773 | 2 4 | 2   | 1 3  | 1 | 4,1 |
| NB/GNBN | 434 1   | 3993 | 3993 | 0   | 2   | 1 4  |   | 2,5 |
| NB/GNBN | 365 3   | 3983 | 3983 | 0   | 2   | 1 3  |   |     |
| NB/GNBN | 176 2,1 | 89   | 3896 | 2 4 |     | 1 3  | 1 | 5   |
| NB/GNBN | 272 1   | 2549 | 2549 | 0   | 2   | 1 4  |   | 2   |
| NB/GNBN | 163 1   | 2467 | 2467 | 0   | 2   | 1 1  |   | 4   |
| NB/GNBN | 456 1   | 1961 | 1961 | 0   | 2   | 1 3  |   | 7   |
| NB/GNBN | 3 1     | 79   | 3638 | 2 2 | 2   | 1 1  |   | 5,5 |
| NB/GNBN | 740 1   | 2905 | 2905 | 0   | 1   | 1 3  |   | 4   |
| NB/GNBN | 452 2,2 | 2619 | 2619 | 0   | 2   | 1 1  |   | 3,5 |
| NB/GNBN | 1232 3  | 602  | 3620 | 2 2 | 2   | 1 3  |   | 4,9 |
| NB/GNBN | 276 2,1 | 2747 | 2747 | 0   | 2   | 1 4  |   | 1,7 |
| NB/GNBN | 425 1   | 2355 | 2355 | 0   | 2   | 1 1  |   | 1,5 |
| NB/GNBN | 565 1   | 1202 | 1202 | 1   | 2   | 1 1  |   | 5   |
| NB/GNBN | 245 1   | 3209 | 3209 | 0   |     | 1 1  |   | 4   |
| NB/GNBN | 245 1   | 2933 | 2933 | 0   | 2   | 1 3  |   | 5   |
| NB/GNBN | 428 2,1 | 3836 | 3836 | 0   | 4   | 10 4 |   | 2   |
| NB/GNBN | 66 2,1  | 3185 | 3185 | 0   | 2   | 1 3  | 1 | 4,1 |
| NB/GNBN | 207 2,2 | 674  | 1820 | 1 4 | 2   | 1 1  |   | 4,5 |
| NB/GNBN | 465 1   | 3634 | 3634 | 0   | 4   | 1 1  |   | 5,5 |
| NB/GNBN | 429 2,1 | 3411 | 3411 | 0   | 2   | 1 3  |   | 6   |
| NB/GNBN | 449 1   | 3352 | 3352 | 0   | 2   | 1 1  |   | 4,2 |
| NB/GNBN | 216 1   | 2184 | 2184 | 0   | 4   | 1 1  |   | 4,2 |
| NB/GNBN | 12 3    | 52   | 2255 | 2 4 | -1  | 1 3  |   | 5   |
| NB/GNBN | 83 1    | 3462 | 3462 | 0   | 2   | 1 1  |   |     |
| NB/GNBN | 485 1   | 3805 | 3805 | 0   | 2   | 1 1  |   | 2   |
| NB/GNBN | 566 3   | 2366 | 2366 | 0   | 2   | 1 6  | 1 | 5   |
| NB/GNBN | 666 2,1 | 56   | 522  | 1 4 | 1,1 | 1 4  | 1 | 6   |
| NB/GNBN | 460 1   | 3080 | 3080 | 0   | 2   | 1 3  |   | 3,6 |
| NB/GNBN | 447 3   | 3720 | 3720 | 0   |     | 1 4  | 1 | 1,5 |
| NB/GNBN | 21 2,2  | 3640 | 3640 | 0   | 1   | 1 3  |   | 1,5 |

|         |          |      |      |     |   |       |   |     |
|---------|----------|------|------|-----|---|-------|---|-----|
| NB/GNBN | 374 2,1  | 3261 | 3261 | 0   | 1 | 1 3   | 1 | 3,6 |
| NB/GNBN | 49 2,1   | 3339 | 3339 | 0   | 2 | 1 1   |   | 4,2 |
| NB/GNBN | 16 1     | 3540 | 3540 | 0   | 2 | 1 1   |   | 4,3 |
| NB/GNBN | 121 1    | 1772 | 1772 | 0   | 2 | 1 3   |   | 3,8 |
| NB/GNBN | 426 3    | 3405 | 3405 | 0   | 2 | 1 4   | 1 |     |
| NB/GNBN | 0 1      | 2220 | 2220 | 0   | 2 | 1 6   |   | 3,8 |
| NB/GNBN | 117 1    | 3409 | 3409 | 0   | 1 | 1 4   |   | 4,5 |
| NB/GNBN | 82 1     | 3584 | 3584 | 0   | 2 | 1 1   |   | 3,7 |
| NB/GNBN | 47 3     | 3226 | 3226 | 0   | 2 | 1 3   |   | 3,8 |
| NB/GNBN | 497 1    | 3468 | 3468 | 0   | 2 | 1 1   |   | 3,2 |
| NB/GNBN | 114 2,1  | 72   | 3837 | 2 4 | 2 | 1 1   |   | 8,5 |
| NB/GNBN | 385 1    | 107  | 3283 | 2 2 | 2 | 1 4   | 1 | 2,9 |
| NB/GNBN | 10 1     | 2055 | 2055 | 0   | 2 | 1 1   |   | 4,5 |
| NB/GNBN | 123 1    | 3149 | 3149 | 0   | 2 | 1 3   |   | 7   |
| NB/GNBN | 155 1    | 1723 | 1723 | 0   | 2 | 1 1   |   | 2,2 |
| NB/GNBN | 367 3    | 2016 | 2016 | 0   | 2 | 1 1   |   | 6   |
| NB/GNBN | 58 1     | 3199 | 3199 | 0   |   | 1 1   |   |     |
| NB/GNBN | 0 2,1    | 76   | 3747 | 2 4 | 2 | 1 1   |   |     |
| NB/GNBN | 76 1     | 3437 | 3437 | 0   |   | 1 1   |   | 4,9 |
| NB/GNBN | 427 1    | 883  | 883  | 0   | 2 | 1 1   |   | 3   |
| NB/GNBN | 25 3     | 126  | 268  | 1 2 |   | 1 3   | 1 | 1,7 |
| NB/GNBN | 743 1    | 2226 | 2226 | 0   | 2 | 1 1   |   | 3   |
| NB/GNBN | 482 2,2  | 32   | 32   | 1   | 4 | 100 1 |   |     |
| NB/GNBN | 156 2,1  | 78   | 3341 | 2 4 | 4 | 1 4   |   | 2,9 |
| NB/GNBN | 324 3    | 75   | 75   | 1   | 2 | 1 3   | 1 | 6,5 |
| NB/GNBN | 465 1    | 2673 | 2673 | 0 0 | 2 | 1 4   |   | 3,4 |
| NB/GNBN | 11 1     | 2434 | 2434 | 0   |   | 1 1   |   |     |
| NB/GNBN | 1536 3   | 117  | 147  | 1 4 | 4 | 50 4  | 1 |     |
| NB/GNBN | 225 1    | 2886 | 2886 | 0   | 2 | 1 1   |   |     |
| NB/GNBN | 1000 3   | 402  | 416  | 1 4 | 4 | 64 3  |   |     |
| NB/GNBN | 460 2,2  | 1748 | 1748 | 0   | 2 | 1 1   |   | 2,2 |
| NB/GNBN | 1690 1   | 3043 | 3043 | 0   |   | 1 1   |   | 6,5 |
| NB/GNBN | 460 2,1  | 2454 | 2454 | 0   | 2 | 1 3   |   | 2,7 |
| NB/GNBN | 480 2,1  | 3574 | 3574 | 0   | 2 | 1 4   | 1 | 3,3 |
| NB/GNBN | 1215 2,2 | 3236 | 3236 | 0   | 2 | 1 4   | 1 | 7   |
| NB/GNBN | 262 1    | 33   | 3759 | 2 2 | 2 | 1 6   |   | 3,5 |
| NB/GNBN | 469 3    | 3331 | 3331 | 0   | 2 | 1 1   |   | 2   |
| NB/GNBN | 1088 3   | 3756 | 3756 | 0   |   | 8 3   |   | 12  |
| NB/GNBN | 291 3    | 3236 | 3236 | 0   | 2 | 1 4   |   |     |
| NB/GNBN | 468 1    | 1484 | 1484 | 0   | 2 | 1 1   |   | 5,5 |
| NB/GNBN | 381 2,2  | 3428 | 3428 | 0   | 2 | 1 1   |   | 4   |
| NB/GNBN | 317 2,2  | 1894 | 1894 | 0   | 2 | 1 5   |   | 3,2 |
| NB/GNBN | 0 1      | 2167 | 2167 |     | 2 | 1 1   |   | 4   |

|         |          |      |      |     |     |      |     |
|---------|----------|------|------|-----|-----|------|-----|
| NB/GNBN | 1652 3   | 3526 | 3526 | 0   | 4   | 64 1 | 8   |
| NB/GNBN | 54 1     | 2740 | 2740 | 0   |     | 1 1  | 3   |
| NB/GNBN | 1 2      | 3293 | 3293 | 0   | 2   | 1 3  | 1 3 |
| NB/GNBN | 867 2,1  | 3452 | 3452 | 0   | 2   | 1 1  | 4,5 |
| NB/GNBN | 638 2,2  | 3290 | 3290 | 0   | 2   | 1 4  | 2,5 |
| NB/GNBN | 91 2,2   | 3208 | 3208 | 0   | 2   | 1 1  | 6,2 |
| NB/GNBN | 507 2,2  | 3508 | 3508 | 0   | 2   | 1 3  | 7   |
| NB/GNBN | 2831 3   | 685  | 3468 | 2 2 | 2   | 1 1  | 7,2 |
| NB/GNBN | 30 1     | 2548 | 2548 | 0   | 2   | 1 3  |     |
| NB/GNBN | 151 3    | 2088 | 2088 | 0   |     | 1 4  | 1   |
| NB/GNBN | 470 3    | 2594 | 2594 | 0   | 2   | 1 1  |     |
| NB/GNBN | 887 1    | 3487 | 3487 | 0   | 2   | 1 1  | 5   |
| NB/GNBN | 94 1     | 2504 | 2504 | 0 0 | 2   | 1 3  | 6   |
| NB/GNBN | 1628 3   | 352  | 423  | 1 4 |     | 16 3 | 9,5 |
| NB/GNBN | 2440 1   | 1845 | 1845 | 0   |     | 1 1  | 10  |
| NB/GNBN | 123 1    | 430  | 430  | 0   | 2   | 1 3  |     |
| NB/GNBN | 340 2,2  | 3467 | 3467 | 0   | 2   | 1 3  | 3,8 |
| NB/GNBN | 31 2     | 86   | 3020 | 2 4 |     | 1 1  | 4,5 |
| NB/GNBN | 140 2,2  | 362  | 598  | 1 2 |     | 32 1 | 4   |
| NB/GNBN | 19 1     | 1647 | 1647 | 0   |     | 1 1  | 4,3 |
| NB/GNBN | 0 1      | 2706 | 2706 | 0   | -1  | 1 1  | 5,3 |
| NB/GNBN | 222 2,1  | 3412 | 3412 | 0   |     | 1 4  | 7   |
| NB/GNBN | 528 2,1  | 2591 | 2591 | 0   | 2   | 1 4  | 3   |
| NB/GNBN | 971 2,1  | 3231 | 3231 | 0   | 2   | 1 4  | 1   |
| NB/GNBN | 473 2,2  | 2868 | 2868 | 0   | 2   | 1 4  |     |
| NB/GNBN | 464 1    | 2928 | 2928 | 0   | 2   | 1 4  | 2,5 |
| NB/GNBN | 2169 2,2 | 277  | 3548 | 2 2 | 1,1 | 1 3  | 7   |
| NB/GNBN | 18 1     | 2175 | 2175 | 0   | 2   | 1 1  | 3   |
| NB/GNBN | 544 1    | 2432 | 2432 | 0   | 2   | 1 4  |     |
| NB/GNBN | 3 3      | 181  | 1037 | 2 4 | 4   | 1 5  | 5   |
| NB/GNBN | 153 2,2  | 2648 | 2648 | 0   |     | 1 5  | 4   |
| NB/GNBN | 606 2,1  | 118  | 3336 | 2 4 |     | 1 4  | 4   |
| NB/GNBN | 406 1    | 3206 | 3206 | 0   |     | 1 1  | 2,5 |
| NB/GNBN | 190 2,1  | 2792 | 2792 | 0   | 2   | 1 1  |     |
| NB/GNBN | 183 2,1  | 1742 | 1742 | 0   | 2   | 1 5  | 3   |
| NB/GNBN | 32 1     | 2422 | 2422 | 0 0 |     | 1 6  | 4,9 |
| NB/GNBN | 26 1     | 2992 | 2992 | 0   |     | 1 1  | 2,8 |
| NB/GNBN | 404 3    | 3047 | 3047 | 0   |     | 1 3  | 5,8 |
| NB/GNBN | 1643 3   | 3156 | 3156 | 0   |     | 1 3  | 10  |
| NB/GNBN | 218 1    | 3013 | 3013 | 0   | 2   | 1 1  | 4   |
| NB/GNBN | 31 1     | 0    | 0    | 1   | 2   | 1 1  | 3   |
| NB/GNBN | 1438 3   | 872  | 3307 | 2 4 | 2   | 1 3  | 5   |
| NB/GNBN | 105 2,1  | 2061 | 2061 |     |     | 1 4  | 3,5 |

|         |          |      |      |     |     |      |   |      |
|---------|----------|------|------|-----|-----|------|---|------|
| NB/GNBN | 199 -1   | 141  | 3092 | 2 4 | 2   | 1 4  |   | 4,1  |
| NB/GNBN | 206 2,1  | 132  | 3217 | 2 4 | 2   | 1 3  |   | 5,8  |
| NB/GNBN | 459 3    | 416  | 3234 | 2 4 | 2   | 1    | 3 | 7    |
| NB/GNBN | 204 1    | 2263 | 2263 | 0   | 2   | 1 1  |   | 9    |
| NB/GNBN | 349 2,1  | 2057 | 2057 | 0   | 2   | 1 3  |   | 6,5  |
| NB/GNBN | 864 3    | 2062 | 3303 | 2 2 | 4   | 20 1 |   |      |
| NB/GNBN | 1495 3   | 1915 | 1992 | 5 5 | 1,1 | 1 1  |   | 10   |
| NB/GNBN | 208 2,1  | 3276 | 3276 | 0   | 2   | 1 4  | 1 | 5,5  |
| NB/GNBN | 1126 3   | 1246 | 3163 | 2 2 | 2   | 1 1  |   | 8,5  |
| NB/GNBN | 119 3    | 108  | 2621 | 2 4 | 2   | 1 3  |   | 4    |
| NB/GNBN | 39 1     | 85   | 3408 | 2 2 |     | 1 1  |   |      |
| NB/GNBN | 502 1    | 1406 | 1406 | 0   | 2   | 1 4  |   | 5    |
| NB/GNBN | 344 3    | 3097 | 3097 | 0   | 2   | 1 4  | 1 |      |
| NB/GNBN | 14 3     | 2086 | 2086 | 0   |     | 1 3  |   | 4    |
| NB/GNBN | 34 1     | 3326 | 3326 | 0   | 2   | 1 1  |   | 4,5  |
| NB/GNBN | 404 1    | 1703 | 1703 | 0   | 2   | 1 3  |   | 9    |
| NB/GNBN | 304 3    | 2988 | 2988 | 0   | 2   | 1 4  | 1 | 4,6  |
| NB/GNBN | 564 1    | 3149 | 3149 | 0 0 | 2   | 1 4  |   |      |
| NB/GNBN | 727 3    | 371  | 3114 | 2 4 | 2   | 1 4  | 1 | 6    |
| NB/GNBN | 379 3    | 3304 | 3304 | 0   | 2   | 1 3  |   | 4,5  |
| NB/GNBN | 151 2,2  | 3324 | 3324 | 0   | 2   | 1 6  |   | 5    |
| NB/GNBN | 197 2,2  | 289  | 3614 | 2 4 | 2   | 1 1  |   | 2,5  |
| NB/GNBN | 63 1     | 2685 | 2685 | 0   | 2   | 1 1  |   | 5    |
| NB/GNBN | 47 3     | 1128 | 3330 | 2 4 | 2   | 1 3  | 1 | 7    |
| NB/GNBN | 33 1     | 1998 | 1998 | 0   | 2   | 1 1  |   | 2,5  |
| NB/GNBN | 0 2,1    | 208  | 2558 | 2 4 | 2   | 1 3  | 1 | 3,5  |
| NB/GNBN | 163 1    | 2304 | 2304 | 0   |     | 1 1  |   | 4,5  |
| NB/GNBN | 4562 2,2 | 759  | 1773 | 1 2 | 2   | 1 1  |   |      |
| NB/GNBN | 37 3     | 119  | 2631 | 2 4 | 2   | 1 4  | 1 | 6    |
| NB/GNBN | 534 1    | 597  | 2913 | 2 2 | -1  | 1 3  |   | 3,6  |
| NB/GNBN | 179 3    | 1771 | 1771 | 0   | 2   | 1 4  | 1 | 4,6  |
| NB/GNBN | 479 1    | 3115 | 3115 | 0   | 2   | 1 3  |   | 2,5  |
| NB/GNBN | 10 2,1   | 3105 | 3105 | 0   |     | 1 4  | 1 | 4,8  |
| NB/GNBN | 1457 1   | 1857 | 1857 | 0   | 2   | 1 3  |   | 5,4  |
| NB/GNBN | 9 2      | 2752 | 2752 | 0   | 2   | 1 4  | 1 | 3,4  |
| NB/GNBN | 292 1    | 1860 | 1860 | 0   |     | 1 5  |   |      |
| NB/GNBN | 77 1     | 3122 | 3122 | 0   | 2   | 1 5  |   | 3    |
| NB/GNBN | 823 3    | 2978 | 2978 | 0   | 4   | 32 1 |   | 9    |
| NB/GNBN | 603 3    | 2151 | 2151 | 0   |     | 1 3  |   | 8    |
| NB/GNBN | 223 2    | 380  | 2627 | 2 4 | 2   | 1 3  |   | 5,8  |
| NB/GNBN | 114 2,1  | 2893 | 2893 | 0   | 2   | 1 4  |   | 3,5  |
| NB/GNBN | 0 1      | 443  | 443  | 0   | 2   | 1 3  |   | 5    |
| NB/GNBN | 270 2,2  | 29   | 3002 |     | 2   | 1 5  |   | 2,44 |

|         |          |      |      |     |     |       |   |   |      |
|---------|----------|------|------|-----|-----|-------|---|---|------|
| NB/GNBN | 1639 3   | 200  | 755  | 2 4 | 2   | 1 5   |   |   | 2,5  |
| NB/GNBN | 366 1    | 2453 | 2453 | 0   |     | 1 1   |   |   | 1,2  |
| NB/GNBN | 6 2,1    | 192  | 3021 | 2 4 | 2   | 1 3   | 1 |   |      |
| NB/GNBN | 515 2,2  | 2591 | 2591 | 0   | 2   | 1 1   |   |   | 5    |
| NB/GNBN | 4273 2,1 | 699  | 2741 | 2 2 | 1,1 | 1 1   |   |   | 12   |
| NB/GNBN | 26 2,2   | 2901 | 2901 | 0   | 2   | 1 1   |   |   | 2,84 |
| NB/GNBN | 7129 3   | 328  | 1969 | 1 4 | 2   | 1 3   |   |   | 3,5  |
| NB/GNBN | 810 2,2  | 916  | 1376 | 1 2 | 4   | 30 1  |   |   | 6    |
| NB/GNBN | 816 1    | 615  | 3010 | 2 2 | 4   | 1     | 3 | 1 | 3    |
| NB/GNBN | 303 1    | 2499 | 2499 | 0   | 2   | 1 6   |   |   | 6    |
| NB/GNBN | 1742 -3  | 2898 | 2898 | 0   | 4   | 64 1  |   |   | 6    |
| NB/GNBN | 149 1    | 1518 | 1518 | 0   | 2   | 1 3   |   |   | 5    |
| NB/GNBN | 734 1    | 2832 | 2832 | 0   | 2   | 10 1  |   |   | 5    |
| NB/GNBN | 470 3    | 3032 | 3032 | 0   | 4   | 100 1 |   |   |      |
| NB/GNBN | 656 1    | 2893 | 2893 | 0   |     | 1 1   |   |   |      |
| NB/GNBN | 314 1    | 2331 | 2331 | 0   |     | 1 4   |   |   |      |
| NB/GNBN | 542 1    | 1946 | 1946 | 0   |     | 1 5   |   |   | 2,4  |
| NB/GNBN | 19 2,1   | 62   | 2561 | 2 4 | 2   | 1 3   | 1 |   | 1    |
| NB/GNBN | 0 1      | 2518 | 2518 | 0   |     | 1 1   |   |   | 3    |
| NB/GNBN | 5715 3   | 1878 | 2476 | 2 4 | 2   | 1 3   | 1 |   |      |
| NB/GNBN | 112 2,1  | 2878 | 2878 | 0   | 2   | 1 4   |   |   | 5,1  |
| NB/GNBN | 10 1     | 2535 | 2535 | 0   |     | 1 5   |   |   |      |
| NB/GNBN | 1465 1   | 1409 | 1409 | 0   | 2   | 1 3   |   |   | 3,5  |
| NB/GNBN | 228 2,2  | 2753 | 2753 | 0   | 2   | 1 1   |   |   | 5,4  |
| NB/GNBN | 848 3    | 2495 | 2495 | 0   | 4   | 50 3  |   |   | 15   |
| NB/GNBN | 4035 3   | 432  | 877  | 1 2 | 2   | 1 1   |   |   | 8    |
| NB/GNBN | 662 3    | 11   | 17   | 1 4 | 2   | 1 4   | 1 |   |      |
| NB/GNBN | 49 1     | 2431 | 2431 | 0   | 2   | 1 1   |   |   |      |
| NB/GNBN | 243 1    | 2828 | 2828 | 0   | 2   | 1 3   |   |   | 2,5  |
| NB/GNBN | 350 1    | 2576 | 2576 | 0   | 1,1 | 1 6   |   |   | 5    |
| NB/GNBN | 1381 3   | 2719 | 2719 | 0   | 2   | 1 4   | 1 |   |      |
| NB/GNBN | 2737 3   | 2828 | 2828 | 0   | 1,1 | 64 1  |   |   | 7,2  |
| NB/GNBN | 248 1    | 3007 | 3007 | 0   | 1,1 | 1 1   |   |   | 2,8  |
| NB/GNBN | 203 2,1  | 2870 | 2870 | 0   | 2   | 1 1   |   |   | 2,3  |
| NB/GNBN | 0 1      | 2804 | 2804 | 0   | 2   | 1 3   |   |   | 2,7  |
| NB/GNBN | 1308 3   | 2787 | 2787 | 0   | 4   | 50 3  |   |   | 4,3  |
| NB/GNBN | 222 3    | 2552 | 2552 | 0   | 1,1 | 1 1   |   |   | 7,9  |
| NB/GNBN | 123 1    | 302  | 2807 | 2 2 |     | 1 3   |   |   | 3,8  |
| NB/GNBN | 230 2,1  | 2316 | 2316 | 0   | 1   | 1 1   |   |   | 4,3  |
| NB/GNBN | 7 2,2    | 2310 | 2310 | 0   | 2   | 1 3   |   |   | 7    |
| NB/GNBN | 61 2,1   | 1655 | 1655 | 0   | 2   | 1 3   |   |   | 2,6  |
| NB/GNBN | 410 1    | 2743 | 2743 | 0   | 2   | 1 1   |   |   | 1,6  |
| NB/GNBN | 335 2,2  | 2046 | 2046 |     | 4   | 32 1  |   |   |      |

|         |          |      |      |         |     |       |   |     |
|---------|----------|------|------|---------|-----|-------|---|-----|
| NB/GNBN | 254 1    | 436  | 2936 | 5 5     | 2   | 1 3   |   | 1,8 |
| NB/GNBN | 4 1      | 2759 | 2759 | 0       | 2   | 1 4   |   | 5,9 |
| NB/GNBN | 240 2,1  | 54   | 2849 | 2 4     | 2   | 1 1   |   | 4,5 |
| NB/GNBN | 155 1    | 2009 | 2009 | 0       | 2   | 1 3   |   | 3   |
| NB/GNBN | 217 2,2  | 2414 | 2414 | 0       | 1,1 | 1 1   |   |     |
| NB/GNBN | 1028 2   | 438  | 849  | 1 4     | 4   | 999 1 | 1 |     |
| NB/GNBN | 220 1    | 2210 | 2210 | 0       |     | 1 1   |   | 5   |
| NB/GNBN | 35 1     | 2812 | 2812 | 0       | 2   | 1 1   |   | 3   |
| NB/GNBN | 38 2,1   | 2117 | 2117 | 0       |     | 1 1   |   | 3,5 |
| NB/GNBN | 2456 2,1 | 2697 | 2697 | 0       | 2   | 20 4  |   | 9,3 |
| NB/GNBN | 0 1      | 2303 | 2303 | 0       |     | 1 1   |   | 2   |
| NB/GNBN | 111 1    | 1760 | 1760 | 0       | 2   | 1 1   |   | 4,6 |
| NB/GNBN | 366 3    | 2348 | 2348 | 0       | 2   | 1 6   | 1 |     |
| NB/GNBN | 4 1      | 1518 | 1518 | 0       | 2   | 1 3   |   |     |
| NB/GNBN | 680 2,2  | 1783 | 1783 | 0       | 2   | 1 3   |   | 7   |
| NB/GNBN | 824 1    | 2723 | 2723 | 0 0     | 2   | 1 3   |   | 2,5 |
| NB/GNBN | 164 1    | 2533 | 2533 | 0       | 2   | 1 1   |   | 3   |
| NB/GNBN | 5 2,1    | 2615 | 2615 | 0       | 2   | 1 3   |   | 5   |
| NB/GNBN | 875 2,2  | 1830 | 1830 | 0       | 2   | 1 3   |   | 5   |
| NB/GNBN | 3 2,1    | 2055 | 2696 | 2 4     | -1  | 1 1   |   |     |
| NB/GNBN | 112 1    | 113  | 1029 | 2 2     | 2   | 1 4   |   |     |
| NB/GNBN | 337 1    | 2400 | 2400 | 0 0     | 2   | 1 1   |   | 2   |
| NB/GNBN | 4110 3   | 991  | 991  | 0       | 4   | 1 1   |   | 9,9 |
| NB/GNBN | 195 1    | 2531 | 2531 | 0       |     | 1 4   |   |     |
| NB/GNBN | 601 2,2  | 2399 | 2399 | 0       | 2   | 1 1   |   | 5,9 |
| NB/GNBN | 222 2,1  | 1955 | 1955 | 0       | 2   | 1 3   |   | 6,2 |
| NB/GNBN | 383 3    | 2535 | 2535 | 0       | 4   | 30 3  |   |     |
| NB/GNBN | 276 3    | 2464 | 2464 | 0       | 2   | 1 1   |   | 7   |
| NB/GNBN | 172 -2,2 | 1728 | 1728 | 0       |     | 1 5   |   |     |
| NB/GNBN | 65 1     | 2407 | 2407 | 0       |     | 1 3   |   | 1,8 |
| NB/GNBN | 0 1      | 2525 | 2525 | 0 0     |     | 1 1   |   | 3   |
| NB/GNBN | 433 3    | 2112 | 2112 | 0       | 4   | 50 3  |   | 6   |
| NB/GNBN | 2 3      | 1001 | 1001 | 0       | 2   | 1 1   |   |     |
| NB/GNBN | 0 1      | 468  | 468  | 0       | 2   | 1 1   |   |     |
| NB/GNBN | 7117 3   | 554  | 1199 | 1 4     | 1,1 | 1 3   |   | 4,8 |
| NB/GNBN | 2540 3   | 2050 | 2050 | 0       | 2   | 1 4   |   | 8   |
| NB/GNBN | 5 3      | 1602 | 1602 | 0       | 2   | 1 3   |   | 7,7 |
| NB/GNBN | 1585 3   | 483  | 846  | 1 4     | 1,1 | 1 3   |   | 7   |
| NB/GNBN | 945 3    | 1839 | 1839 | 0       | 4   | 30 1  |   | 5,3 |
| NB/GNBN | 6 2,1    | 672  | 672  | 0       |     | 1 1   |   | 3,2 |
| NB/GNBN | 6 2,1    | 249  | 2016 | 2 4     | 2   | 1 3   | 0 | 1,7 |
| NB/GNBN | 356 2,2  | 2390 | 2390 | 0 0     | 2   | 1 1   |   | 6,2 |
| NB/GNBN | 778 2,1  | 2044 | 2044 | Page 12 | 2   | 1 1   | 1 | 4   |

|         |         |      |      |     |     |       |   |     |
|---------|---------|------|------|-----|-----|-------|---|-----|
| NB/GNBN | 118 2,1 | 1039 | 2248 | 2 4 | 2   | 1,5 1 |   |     |
| NB/GNBN | 224 1   | 2743 | 2743 | 0   | 2   | 1 1   |   |     |
| NB/GNBN | 530 1   | 2315 | 2315 | 0   | 2   | 1 1   |   | 2,5 |
| NB/GNBN | 571 3   | 2420 | 2420 | 0   | 4   | 50 1  |   | 10  |
| NB/GNBN | 633 3   | 111  | 2433 | 2 4 | 2   | 1 6   |   | 7,8 |
| NB/GNBN | 186 1   | 1513 | 1513 | 0   | 2   | 1 3   |   | 3   |
| NB/GNBN | 42 2,1  | 2054 | 2054 | 0   | 2   | 1 1   |   | 6   |
| NB/GNBN | 145 3   | 2277 | 2277 | 0 0 | 2   | 1 5   |   |     |
| NB/GNBN | 318 1   | 2666 | 2666 | 0   |     | 1 4   |   | 1,5 |
| NB/GNBN | 1 2,1   | 1765 | 1765 | 0   | 2   | 1 5   |   | 3   |
| NB/GNBN | 557 3   | 184  | 264  | 1 2 | 1,1 | 20 1  |   | 8,5 |
| NB/GNBN | 54 3    | 2276 | 2276 | 0   | 2   | 1 3   |   | 6,5 |
| NB/GNBN | 3 1     | 2390 | 2390 | 0 0 | 2   | 1 1   |   |     |
| NB/GNBN | 765 2,2 | 2306 | 2306 | 0 0 | 2   | 1 1   |   | 4   |
| NB/GNBN | 103 1   | 2324 | 2324 | 0   | 2   | 1 1   |   | 2   |
| NB/GNBN | 11 3    | 2526 | 2526 | 0   | -1  | 1 5   |   |     |
| NB/GNBN | 758 1   | 363  | 2085 | 2 2 | 2   | 1 1   |   | 5,7 |
| NB/GNBN | 0 1     | 2387 | 2387 | 0   | 2   | 1 1   |   | 3,5 |
| NB/GNBN | 528 1   | 1907 | 1907 | 0   | 2   | 1 3   |   | 1,8 |
| NB/GNBN | 13 3    | 2186 | 2186 | 0   | 2   | 1 6   | 0 | 2   |
| NB/GNBN | 25 1    | 1680 | 1680 | 0   | 2   | 1 1   |   |     |
| NB/GNBN | 40 1    | 2310 | 2310 | 0 0 | 2   | 1 1   |   | 5,4 |
| NB/GNBN | 245 3   | 2410 | 2410 | 0   | 2   | 15 3  |   | 6   |
| NB/GNBN | 767 3   | 330  | 404  | 1 4 |     | 15 3  | 1 | 8,5 |
| NB/GNBN | 76 3    | 2085 | 2085 | 0   | 1,1 | 10 4  | 1 | 10  |
| NB/GNBN | 561 3   | 251  | 251  | 1 0 | 4   | 20 3  |   | 10  |
| NB/GNBN | 87 2,1  | 155  | 2185 | 2 4 | 2   | 1 1   |   | 3,8 |
| NB/GNBN | 0 2,1   | 2041 | 2041 | 0   | 2   | 1 4   |   | 1,9 |
| NB/GNBN | 198 -1  | 203  | 1538 | 2 2 | 1,1 | 1 1   |   | 4   |
| NB/GNBN | 256 2,1 | 1016 | 1016 | 0   | 2   | 1 3   | 1 |     |
| NB/GNBN | 482 2,1 | 2099 | 2099 | 0   |     | 1 3   |   | 0,9 |
| NB/GNBN | 1439 1  | 2368 | 2368 | 0   | 2   | 1 4   |   | 1   |
| NB/GNBN | 301 2,1 | 2150 | 2150 | 0   | 2   | 1 6   |   | 3   |
| NB/GNBN | 312 3   | 2144 | 2144 | 0   | 2   | 1 3   |   | 9,2 |
| NB/GNBN | 249 1   | 2006 | 2006 | 0   | 2   | 1 1   |   | 2,9 |
| NB/GNBN | 2 2,2   | 1656 | 1656 | 0   | 2   | 1 5   |   | 2,5 |
| NB/GNBN | 13 1    | 2464 | 2464 | 0   |     | 1 1   |   | 3,5 |
| NB/GNBN | 2041 1  | 2280 | 2280 | 0 0 | 4   | 1 1   |   | 7,5 |
| NB/GNBN | 1017 3  | 250  | 364  | 1 2 | 1,1 | 30 3  |   | 5   |
| NB/GNBN | 262 1   | 2017 | 2017 | 0   | 1,1 | 1 1   |   | 3,5 |
| NB/GNBN | 111 3   | 168  | 1792 | 2 4 | 2   | 1 1   |   | 4,4 |
| NB/GNBN | 134 2,1 | 2029 | 2029 | 0   | 2   | 1 3   |   | 5,1 |
| NB/GNBN | 330 3   | 2278 | 2278 |     | 2   | 1 4   | 1 | 14  |

|         |          |      |      |     |     |       |       |
|---------|----------|------|------|-----|-----|-------|-------|
| NB/GNBN | 121 2,1  | 2143 | 2143 | 0   | 2   | 1 3   | 6,7   |
| NB/GNBN | 1701 3   | 2365 | 2365 | 0   | 2   | 1 1   |       |
| NB/GNBN | 167 2,2  | 2295 | 2295 | 0 0 | 2   | 1 1   | 5,5   |
| NB/GNBN | 0 2,1    | 107  | 1453 | 2 4 | 2   | 1 1   | 3,4   |
| NB/GNBN | 29 2,1   | 1851 | 1851 | 0   | 2   | 1 1   | 6     |
| NB/GNBN | 315 1    | 1663 | 1663 | 0   | 2   | 1 1   | 5     |
| NB/GNBN | 83 -1    | 15   | 15   | 0   | 2   | 1 1   | 3     |
| NB/GNBN | 526 3    | 295  | 429  | 1 2 | 1,1 | 15 3  | 11    |
| NB/GNBN | 2111 2,1 | 2253 | 2253 | 0   | 2   | 1 1   | 10,6  |
| NB/GNBN | 625 3    | 2163 | 2163 | 0   | -1  | 100 1 | 4     |
| NB/GNBN | 59 1     | 1976 | 1976 | 0   | 2   | 1 1   | 3     |
| NB/GNBN | 13 2,1   | 98   | 1980 | 2 4 | 2   | 1 4   | 2     |
| NB/GNBN | 0 2,1    | 70   | 2170 | 2 4 | 2   | 1 1   |       |
| NB/GNBN | 1810 2,2 | 2107 | 2107 | 0   | 2   | 1 4   | 0,8   |
| NB/GNBN | 74 2,1   | 182  | 2105 | 2 4 | 2   | 1 4   | 1     |
| NB/GNBN | 1004 3   | 866  | 1540 | 1 2 | 1,1 | 1 1   |       |
| NB/GNBN | 133 2,1  | 2223 | 2223 | 0   | 2   | 1 3   | 4     |
| NB/GNBN | 385 3    | 1933 | 1933 | 0   | 2   | 1 4   | 3     |
| NB/GNBN | 890 2,1  | 1774 | 1774 | 0 0 | 2   | 1 6   | 1 6,5 |
| NB/GNBN | 217 2,2  | 1726 | 1726 | 0   | 2   | 1 4   | 6     |
| NB/GNBN | 103 1    | 2114 | 2114 | 0   | 2   | 1 1   | 2     |
| NB/GNBN | 370 2,2  | 1597 | 1597 | 0   | 2   | 1 1   | 4     |
| NB/GNBN | 933 1    | 1834 | 1834 | 0   | 1,1 | 1 4   | 1,9   |
| NB/GNBN | 1895 3   | 307  | 416  | 1 4 | 2   | 1 3   | 7,1   |
| NB/GNBN | 3181 2,1 | 295  | 295  | 1   | 2   | 1 4   | 4,6   |
| NB/GNBN | 1408 3   | 540  | 1120 | 1 2 | 2   | 1 1   | 7,1   |
| NB/GNBN | 1221 3   | 1952 | 1952 | 0   | 4   | 50 3  | 7,5   |
| NB/GNBN | 433 1    | 2100 | 2100 | 0   | 4   | 50 1  | 3,6   |
| NB/GNBN | 1683 3   | 2014 | 2014 | 0   | 2   | 1 4   | 8     |
| NB/GNBN | 90 1     | 1483 | 1483 | 0 0 | 2   | 1 1   | 2,9   |
| NB/GNBN | 17 3     | 33   | 1903 | 2 4 | 2   | 1 6   | 7     |
| NB/GNBN | 379 2,1  | 10   | 1772 | 2 4 | 2   | 1 3   | 8,7   |
| NB/GNBN | 463 1    | 2080 | 2080 | 0   | 2   | 1 3   | 4,5   |
| NB/GNBN | 64 3     | 1862 | 1862 | 0   | 2   | 1 6   | 1     |
| NB/GNBN | 0 2,1    | 2037 | 2037 | 0   | 2   | 1 1   |       |
| NB/GNBN | 85 3     | 1919 | 1919 | 0   | 2   | 1 1   | 1     |
| NB/GNBN | 614 2,2  | 109  | 249  | 1 2 | 2   | 15 1  | 5     |
| NB/GNBN | 732 1    | 1555 | 1555 | 0   | -1  | 1 3   | 5,5   |
| NB/GNBN | 276 2,1  | 2027 | 2027 | 0   | 2   | 1 3   | 9     |
| NB/GNBN | 20 1     | 1989 | 1989 | 0   | 2   | 1 1   | 2     |
| NB/GNBN | 1798 1   | 1470 | 1470 | 0 0 | 2   | 1 1   | 8     |
| NB/GNBN | 443 1    | 1834 | 1834 | 0   | 2   | 1 4   | 5,7   |
| NB/GNBN | 300 2,1  | 1775 | 1775 | 0   | 2   | 1 4   | 1 4   |

|         |          |      |      |     |     |     |   |     |
|---------|----------|------|------|-----|-----|-----|---|-----|
| NB/GNBN | 2253 2,1 | 306  | 752  | 1 4 | 1,1 | 1 3 |   | 8,3 |
| NB/GNBN | 267 1    | 1831 | 1831 | 0   | 1,1 | 1 1 |   | 3   |
| NB/GNBN | 0 1      | 1912 | 1912 | 0   | 2   | 1 1 |   | 4,9 |
| NB/GNBN | 412 3    | 982  | 2171 | 2 4 | 2   | 1 1 |   | 6   |
| NB/GNBN | 1157 3   | 1179 | 1179 | 0   | 2   | 1 1 |   |     |
| NB/GNBN | 596 2,1  | 1720 | 1720 | 0   | 2   | 1 1 |   | 2,3 |
| NB/GNBN | 5210 3   | 743  | 987  | 1 4 | 2   | 1 3 |   |     |
| NB/GNBN | 217 3    | 1860 | 1860 | 0   | 2   | 1 3 | 1 | 6,3 |
| NB/GNBN | 246 2,2  | 322  | 1786 | 2 2 | 2   | 1 1 |   | 5,5 |
| NB/GNBN | 1424 3   | 1811 | 1811 | 0   | 2   | 1 4 |   | 7,1 |
| NB/GNBN | 14 2,1   | 1870 | 1870 | 0   | 2   | 1 5 |   |     |
| NB/GNBN | 3739 2,1 | 1835 | 1835 | 0   | -1  | 1 1 |   | 7   |
| NB/GNBN | 132 3    | 1780 | 1780 | 0   | -1  | 1 3 |   | 2,5 |
| NB/GNBN | 42 2,1   | 83   | 1930 | 2 4 | 2   | 1 1 |   | 3,8 |
| NB/GNBN | 224 3    | 1898 | 1898 | 0   | 2   | 1 3 |   | 6   |
| NB/GNBN | 3447 1   | 1306 | 1306 | 0 0 | -1  | 1 3 |   | 4,9 |
| NB/GNBN | 0 2,2    | 1691 | 1691 | 0   | 2   | 1 1 |   | 3,2 |
| NB/GNBN | 2404 1   | 1394 | 1394 | 0   |     | 1 4 | 1 |     |
| NB/GNBN | 68 2,1   | 1661 | 1661 | 0 0 | 2   | 1 1 |   | 1,7 |
| NB/GNBN | 23 1     | 1582 | 1582 | 0   | 2   | 1 5 |   | 1,7 |
| NB/GNBN | 20 1     | 1839 | 1839 | 0   |     | 1 6 |   | 2,3 |
| NB/GNBN | 227 3    | 321  | 1772 | 2 2 | 2   | 1 3 |   | 4,3 |
| NB/GNBN | 146 1    | 1788 | 1788 | 0 0 | 2   | 1 6 |   | 5,1 |
| NB/GNBN | 1032 1   | 1819 | 1819 | 0   | 2   | 1 4 |   | 2,3 |
| NB/GNBN | 583 2,2  | 1079 | 1079 | 0   |     | 1 1 |   | 3,7 |
| NB/GNBN | 280 3    | 1662 | 1662 | 0   | 2   | 1 3 | 1 |     |
| NB/GNBN | 791 1    | 1903 | 1903 | 0   | 2   | 1 3 |   | 4,9 |
| NB/GNBN | 1676 2,2 | 1791 | 1791 | 0   | 2   | 1 1 |   | 3,5 |
| NB/GNBN | 547 2,1  | 767  | 1110 | 5 5 | -1  | 1 3 |   | 5   |
| NB/GNBN | 332 2,1  | 1629 | 1629 | 0   | 2   | 1 3 |   |     |
| NB/GNBN | 3176 3   | 1762 | 1762 | 0   | 2   | 1 3 |   | 5,6 |
| NB/GNBN | 19 1     | 1879 | 1879 | 0   |     | 1 3 |   | 2,1 |
| NB/GNBN | 75 1     | 1958 | 1958 | 0 0 | 2   | 1 1 |   | 3   |
| NB/GNBN | 5 3      | 1624 | 1624 | 0   | -1  | 1 4 |   | 8,8 |
| NB/GNBN | 732 2,1  | 1069 | 1069 | 0   | 2   | 1 1 |   |     |
| NB/GNBN | 27 1     | 1494 | 1494 | 0   | 2   | 1 5 |   |     |
| NB/GNBN | 127 3    | 1939 | 1939 | 0   | 2   | 1 4 | 1 | 4   |
| NB/GNBN | 29 1     | 1866 | 1866 | 0   | 2   | 1 1 |   |     |
| NB/GNBN | 569 2,2  | 1299 | 1299 | 0   | 2   | 1 6 |   | 5,6 |
| NB/GNBN | 409 3    | 450  | 1570 | 2 4 | 2   | 1 3 | 1 | 7,2 |
| NB/GNBN | 707 3    | 1282 | 1282 | 0   | 2   | 1 1 |   | 6   |
| NB/GNBN | 198 2,1  | 1962 | 1962 | 0   | 2   | 1 3 | 1 | 6,6 |
| NB/GNBN | 265 2,1  | 77   | 1963 |     | 2   | 1 1 |   | 7   |

|         |          |      |      |     |     |       |   |      |
|---------|----------|------|------|-----|-----|-------|---|------|
| NB/GNBN | 152 3    | 75   | 1847 | 2 4 | 2   | 1 1   |   | 5,5  |
| NB/GNBN | 337 2,1  | 1586 | 1586 | 0   | 1,1 | 1 5   |   |      |
| NB/GNBN | 2872 2,1 | 1192 | 1192 | 0   | 2   | 1 8   |   | 4,4  |
| NB/GNBN | 736 1    | 1220 | 1220 | 0   | 2   | 1 4   |   | 1,6  |
| NB/GNBN | 576 2,1  | 1891 | 1891 | 0 0 | 2   | 1 5   |   |      |
| NB/GNBN | 133 1    | 1538 | 1538 | 0   | 2   | 1 1   |   | 5    |
| NB/GNBN | 2432 1   | 1681 | 1681 | 0   | 2   | 1 1   |   | 2,5  |
| NB/GNBN | 165 1    | 1086 | 1086 | 0   | 2   | 1 1   |   |      |
| NB/GNBN | 363 3    | 1910 | 1910 | 0   | 2   | 1 3   |   | 7,8  |
| NB/GNBN | 0 1      | 1717 | 1717 | 0   | 2   | 1 1   |   | 4,2  |
| NB/GNBN | 98 1     | 1637 | 1637 | 0   | 1,1 | 1 1   |   | 1,9  |
| NB/GNBN | 259 1    | 715  | 1854 | 2 2 | 2   | 1 3   |   | 2,7  |
| NB/GNBN | 581 2,1  | 172  | 1680 | 2 4 | 2   | 1 3   |   | 3,5  |
| NB/GNBN | 53 1     | 1565 | 1565 | 0   | 2   | 1 1   |   | 2,8  |
| NB/GNBN | 101 1    | 1397 | 1397 | 0   | 2   | 1 1   |   |      |
| NB/GNBN | 566 1    | 1442 | 1442 | 0   | 2   | 1 1   |   | 1,8  |
| NB/GNBN | 226 1    | 1658 | 1658 | 0 0 | 2   | 1 5   |   | 4    |
| NB/GNBN | 118 1    | 1546 | 1546 | 0   | 2   | 1 1   |   | 2,5  |
| NB/GNBN | 129 2,1  | 1823 | 1823 | 0   | 2   | 1 1   |   | 2,6  |
| NB/GNBN | 51 2,2   | 1491 | 1491 | 0   | 2   | 1 5   |   |      |
| NB/GNBN | 227 3    | 112  | 1540 | 2 4 | 2   | 1,5 3 | 1 |      |
| NB/GNBN | 1 3      | 150  | 1524 | 2 4 | 2   | 1 4   | 1 | 6    |
| NB/GNBN | 218 3    | 1354 | 1354 | 0   | 2   | 1 1   |   | 6,4  |
| NB/GNBN | 52 2,1   | 1756 | 1756 | 0   | 2   | 1 1   |   | 2,9  |
| NB/GNBN | 2225 2,2 | 928  | 1008 | 2 2 | 1,1 | 1 1   |   | 5,5  |
| NB/GNBN | 9 3      | 390  | 390  | 0   | 2   | 1 4   |   | 6,8  |
| NB/GNBN | 0 1      | 959  | 959  | 0   | 2   | 1 1   |   | 1,5  |
| NB/GNBN | 1914 3   | 805  | 1674 | 1 4 | 1,1 | 1 3   |   | 10   |
| NB/GNBN | 913 3    | 275  | 494  | 1 4 | 2   | 15 1  |   | 10,5 |
| NB/GNBN | 98 1     | 776  | 776  | 0   | 2   | 1 3   |   | 2,8  |
| NB/GNBN | 8 2,1    | 1605 | 1605 | 0   | 2   | 1 5   |   | 1,3  |
| NB/GNBN | 129 1    | 1624 | 1624 | 0   | 2   | 1 4   |   |      |
| NB/GNBN | 129 2,2  | 1306 | 1306 | 0   | 2   | 1 1   |   | 4,5  |
| NB/GNBN | 3488 1   | 1492 | 1492 | 0   | 2   | 1 1   |   | 6,5  |
| NB/GNBN | 0 2,2    | 68   | 1218 | 2 4 | 2   | 1 1   |   |      |
| NB/GNBN | 1099 2,2 | 1044 | 1044 | 0   | 2   | 1 3   |   | 4    |
| NB/GNBN | 84 3     | 1586 | 1586 | 0   | -1  | 1 1   |   |      |
| NB/GNBN | 10 3     | 1419 | 1419 | 0   | 2   | 1 3   | 1 | 3    |
| NB/GNBN | 262 1    | 1461 | 1461 | 0   | 2   | 1 1   |   | 2,2  |
| NB/GNBN | 0 2,1    | 1454 | 1454 | 0   | 2   | 1 3   |   | 6,3  |
| NB/GNBN | 120 3    | 1334 | 1334 | 0   | 2   | 1 3   | 1 | 6,7  |
| NB/GNBN | 28 3     | 188  | 1330 | 2 4 | 2   | 1 1   |   | 4    |
| NB/GNBN | 428 3    | 1463 | 1463 |     | 2   | 1 3   |   | 9    |

|         |          |      |      |     |     |       |   |      |
|---------|----------|------|------|-----|-----|-------|---|------|
| NB/GNBN | 1742 3   | 1020 | 1020 | 0   | 4   | 20 3  |   | 13   |
| NB/GNBN | 2261 3   | 497  | 530  | 1 4 | 1,1 | 20 1  |   | 10   |
| NB/GNBN | 560 1    | 1389 | 1389 | 0   | 2   | 1 3   |   | 5,6  |
| NB/GNBN | 0 3      | 186  | 1323 | 2 4 | 2   | 1 1   | 1 | 5    |
| NB/GNBN | 84 2,1   | 1312 | 1312 | 0   | 2   | 1 4   |   |      |
| NB/GNBN | 279 3    | 738  | 1144 | 2 4 | 2   | 1 1   | 1 | 10,5 |
| NB/GNBN | 23 1     | 1441 | 1441 | 0   | 2   | 1 1   |   | 2,1  |
| NB/GNBN | 18 1     | 1324 | 1324 | 0   | 2   | 1 3   |   | 2    |
| NB/GNBN | 47 2,1   | 1495 | 1495 | 0   | 2   | 1 1   |   |      |
| NB/GNBN | 1067 3   | 692  | 1426 | 2 4 | 2   | 1 3   |   | 4    |
| NB/GNBN | 49 3     | 59   | 1333 | 2 4 | 2   | 1 3   |   | 4,7  |
| NB/GNBN | 514 2,2  | 141  | 141  | 0   | 2   | 1 4   | 1 |      |
| NB/GNBN | 2 2,1    | 1518 | 1518 | 0   | 2   | 1 1   |   | 6    |
| NB/GNBN | 170 2,1  | 1261 | 1261 | 0   | 2   | 1,5 5 |   | 1,5  |
| NB/GNBN | 1516 1   | 1350 | 1350 | 0   | 2   | 1 1   |   |      |
| NB/GNBN | 1267 2,1 | 102  | 1188 | 2 4 | 2   | 1 4   | 1 | 4,6  |
| NB/GNBN | 356 1    | 1211 | 1211 | 0   | 2   | 1 3   |   | 2,8  |
| NB/GNBN | 999 3    | 1009 | 1009 | 0   | 1,1 | 999 1 |   | 6,9  |
| NB/GNBN | 271 3    | 1226 | 1226 | 0   | 2   | 1,5 4 | 1 | 5    |
| NB/GNBN | 790 3    | 1198 | 1198 | 0   | 2   | 40 3  |   |      |
| NB/GNBN | 204 2,2  | 1207 | 1207 | 0   | 2   | 1 5   |   | 1,4  |
| NB/GNBN | 34 1     | 1136 | 1136 | 0   | 2   | 1 1   |   | 2,5  |
| NB/GNBN | 448 3    | 295  | 1514 | 2 4 | 2   | 1 4   | 1 | 4,5  |
| NB/GNBN | 3 2,1    | 390  | 1239 | 2 4 | 2   | 1 1   |   | 3    |
| NB/GNBN | 711 3    | 196  | 480  | 1 4 | 1,1 | 1 3   |   | 8    |
| NB/GNBN | 91 1     | 1152 | 1152 | 0   | 2   | 1 1   |   | 4    |
| NB/GNBN | 1057 3   | 349  | 1123 | 1 2 | 2   | 1 1   |   | 15   |
| NB/GNBN | 636 2,1  | 1559 | 1559 | 0   | 2   | 1 4   | 1 |      |
| NB/GNBN | 121 3    | 74   | 1445 | 2 4 | 2   | 1 6   | 1 | 7,5  |
| NB/GNBN | 410 3    | 180  | 180  | 0   |     | 999 1 |   | 7,5  |
| NB/GNBN | 363 2,1  | 1340 | 1340 | 0   | 1,1 | 1 3   | 1 |      |
| NB/GNBN | 263 3    | 1038 | 1038 | 0   |     | -1 6  | 1 |      |
| NB/GNBN | 56 1     | 1134 | 1134 | 0   | 2   | 1 1   |   | 2,9  |
| NB/GNBN | 310 3    | 98   | 103  | 1 4 | 4   | 50 1  |   | 6,5  |
| NB/GNBN | 38 3     | 1281 | 1281 | 0   | 2   | 1 6   | 1 | 4    |
| NB/GNBN | 1947 1   | 763  | 763  | 0   | 2   | 1 1   |   | 11,3 |
| NB/GNBN | 423 3    | 417  | 526  | 1 2 | 4   | 50 1  |   | 13   |
| NB/GNBN | 1787 2,2 | 244  | 1340 | 2 2 | 2   | 1 1   |   | 6,4  |
| NB/GNBN | 829 3    | 1313 | 1313 | 0   | 4   | 70 1  |   | 6    |
| NB/GNBN | 460 1    | 1160 | 1160 | 0   | 2   | 1 1   |   | 1,8  |
| NB/GNBN | 11 1     | 937  | 937  | 0   | 2   | 1 1   |   | 4,4  |
| NB/GNBN | 316 -2,1 | 950  | 950  | 0   | 2   | 1 3   |   | 4    |
| NB/GNBN | 306 1    | 1108 | 1108 |     | 2   | 1 1   |   | 4,4  |

|         |          |      |      |     |     |      |   |      |
|---------|----------|------|------|-----|-----|------|---|------|
| NB/GNBN | 2087 3   | 1236 | 1236 | 0   | 1,1 | 1 3  |   | 5    |
| NB/GNBN | 695 3    | 1168 | 1168 | 0   | 2   | 1 6  | 1 | 6    |
| NB/GNBN | 948 3    | 898  | 898  | 0   | 4   | 30 1 |   | 11   |
| NB/GNBN | 14 3     | 1280 | 1280 | 0   | 2   | 1 6  | 1 | 2    |
| NB/GNBN | 622 3    | 754  | 754  | 0   | 2   | 1 3  |   | 6,9  |
| NB/GNBN | 860 3    | 1059 | 1059 | 0   | 2   | 1 3  |   | 2,7  |
| NB/GNBN | 679 1    | 1181 | 1181 | 0   | 2   | 1 1  |   |      |
| NB/GNBN | 751 1    | 1037 | 1037 | 0   | 2   | 1 6  |   | 7,8  |
| NB/GNBN | 34 1     | 990  | 990  | 0   | 2   | 1 1  |   | 1,5  |
| NB/GNBN | 233 3    | 860  | 860  | 0   | 2   | 1 1  |   | 4,6  |
| NB/GNBN | 558 2,1  | 863  | 863  | 0   | 2   | 1 3  |   | 3,8  |
| NB/GNBN | 257 1    | 848  | 848  | 0   | 2   | 1 1  |   | 2    |
| NB/GNBN | 245 1    | 850  | 850  | 0   | 2   | 1 1  |   | 4,3  |
| NB/GNBN | 128 3    | 254  | 995  | 2 4 | 2   | 1 3  | 1 | 2,2  |
| NB/GNBN | 217 3    | 1028 | 1028 | 0   | 2   | 1 3  |   | 5,6  |
| NB/GNBN | 34 1     | 1105 | 1105 | 0   | 4   | 10 1 |   | 2,8  |
| NB/GNBN | 1549 3   | 1085 | 1085 | 0   | 2   | 1 3  | 1 | 2,1  |
| NB/GNBN | 540 -2,1 | 143  | 143  | 0 0 | 2   | 1 6  | 1 |      |
| NB/GNBN | 20 2,1   | 1033 | 1033 | 0   | 2   | 1 3  | 1 |      |
| NB/GNBN | 532 1    | 996  | 996  | 0   | 2   | 1 3  |   |      |
| NB/GNBN | 1852 1   | 1209 | 1209 | 0   | 2   | 1 4  |   | 5,5  |
| NB/GNBN | 599 3    | 794  | 794  | 0   | 4   | 20 1 |   | 8,7  |
| NB/GNBN | 843 2,1  | 225  | 409  | 1 4 | 2   | 1 3  | 1 | 4,8  |
| NB/GNBN | 209 2,1  | 1054 | 1054 | 0   | 2   | 1 5  |   | 5,5  |
| NB/GNBN | 286 3    | 825  | 825  | 0   | 2   | 1 3  |   |      |
| NB/GNBN | 46 2,2   | 1009 | 1009 | 0   | -1  | 1 5  |   | 3    |
| NB/GNBN | 5 2,1    | 827  | 827  | 0   | 2   | 1 6  |   | 3,1  |
| NB/GNBN | 437 1    | 1121 | 1121 | 0   | 2   | 1 1  |   | 4,3  |
| NB/GNBN | 734 1    | 804  | 804  | 0   | 2   | 1 1  |   | 3,7  |
| NB/GNBN | 12 2,1   | 623  | 623  | 0   | 2   | 1 3  | 1 |      |
| NB/GNBN | 3866 3   | 915  | 915  | 0   | 2   | 1 3  |   | 13   |
| NB/GNBN | 39 1     | 912  | 912  | 0   | 2   | 1 5  |   | 4,9  |
| NB/GNBN | 124 2,1  | 812  | 812  | 0   | 2   | 1 3  |   | 7,7  |
| NB/GNBN | 35 2,1   | 1023 | 1023 | 0   | -1  | 1 1  |   | 1,5  |
| NB/GNBN | 136 2,1  | 53   | 976  | 2 4 | 2   | 1 3  |   | 11   |
| NB/GNBN | 5578 3   | 858  | 858  | 0   | 1,1 | 1 4  |   |      |
| NB/GNBN | 101 3    | 907  | 907  | 0   | 2   | 1 6  |   |      |
| NB/GNBN | 589 1    | 899  | 899  | 0   | 2   | 1 1  |   | 6    |
| NB/GNBN | 327 2,1  | 395  | 395  | 0   | 2   | 1 3  |   | 8,7  |
| NB/GNBN | 43 1     | 856  | 856  | 0 0 | 2   | 1 1  |   | 3,2  |
| NB/GNBN | 126 1    | 339  | 339  | 0   | 2   | 1 1  |   | 2,6  |
| NB/GNBN | 5225 2,2 | 337  | 966  | 2 2 | 2   | 1 1  |   | 16   |
| NB/GNBN | 1590 3   | 765  | 765  |     | 2   | 20 1 |   | 11,5 |

|         |         |      |      |     |     |       |   |      |
|---------|---------|------|------|-----|-----|-------|---|------|
| NB/GNBN | 80 2,1  | 423  | 423  | 0   | -1  | 1 6   |   | 1,5  |
| NB/GNBN | 7484 1  | 1076 | 1076 | 0   | 2   | 1 3   |   | 6,7  |
| NB/GNBN | 63 2,2  | 395  | 395  | 0   | 2   | 1 3   |   | 3    |
| NB/GNBN | 238 3   | 70   | 997  | 2 4 | -1  | 1 1   |   | 10,4 |
| NB/GNBN | 312 3   | 678  | 678  | 0   | 2   | 1 3   |   | 6,7  |
| NB/GNBN | 336 3   | 850  | 850  | 0   | 2   | 1 3   |   | 4    |
| NB/GNBN | 456 3   | 839  | 839  | 0   | 2   | 1 3   | 1 | 8,8  |
| NB/GNBN | 75 1    | 785  | 785  | 0   | 2   | 1 1   |   | 3,5  |
| NB/GNBN | 2333 3  | 1074 | 1074 | 0   | 4   | 20 1  |   | 4,7  |
| NB/GNBN | 1885 3  | 441  | 1020 | 2 4 | 2   | 1,5 1 |   |      |
| NB/GNBN | 568 2,2 | 239  | 694  | 2 4 | 2   | 1 4   | 1 |      |
| NB/GNBN | 118 2,1 | 1010 | 1010 | 0   | 2   | 1 1   |   | 6,3  |
| NB/GNBN | 329 1   | 7    | 7    | 0   | 1,1 | 1 1   |   | 6    |
| NB/GNBN | 1533 1  | 782  | 782  | 0   | 2   | 1 3   |   | 6,1  |
| NB/GNBN | 417 2,1 | 573  | 573  | 0   | 1,1 | 1 1   |   | 5    |
| NB/GNBN | 4102 1  | 877  | 877  | 0   | 2   | 1 3   |   | 7,5  |
| NB/GNBN | 122 1   | 761  | 761  | 0   | 2   | 1 1   |   | 3,9  |
| NB/GNBN | 112 2,1 | 657  | 1391 | 2 4 | 2   | 10 1  |   | 3    |
| NB/GNBN | 534 3   | 931  | 931  | 2 4 | 2   | 1 3   |   | 9    |
| NB/GNBN | 86 2,1  | 999  | 999  | 0   | 1,1 | 1 1   |   |      |
| NB/GNBN | 20 2,1  | 282  | 282  | 0   | 2   | 1 1   |   | 3,2  |
| NB/GNBN | 38 2,1  | 879  | 879  | 0   | 2   | 1 3   |   | 5,5  |
| NB/GNBN | 667 2,1 | 479  | 479  | 0   | 2   | 1 1   |   | 2,4  |
| NB/GNBN | 68 1    | 423  | 423  | 0   | 2   | 1 5   |   | 2    |
| NB/GNBN | 205 3   | 607  | 607  | 0   | 2   | 1 3   | 1 | 6,5  |
| NB/GNBN | 768 3   | 755  | 755  | 0   | 4   | 1,5 1 |   | 12   |
| NB/GNBN | 1197 1  | 734  | 734  | 0   | 2   | 1 3   |   | 6,4  |
| NB/GNBN | 1300 1  | 217  | 217  | 0   | 2   | 1 4   |   | 6    |
| NB/GNBN | 0 2,1   | 380  | 380  | 0   | 2   | 1 1   |   | 3,2  |
| NB/GNBN | 757 2,1 | 595  | 595  | 0   | 2   | 1 3   |   | 1,4  |
| NB/GNBN | 19 1    | 629  | 629  | 0   | 2   | 1 1   |   | 4,3  |
| NB/GNBN | 73 1    | 691  | 691  | 0   | 1,1 | 1 6   |   | 4    |
| NB/GNBN | 30 1    | 282  | 282  | 0   | 2   | 1 1   |   | 3,3  |
| NB/GNBN | 4 1     | 820  | 820  | 0   | 2   | 1 1   |   | 3,6  |
| NB/GNBN | 71 2,1  | 794  | 794  | 0   | 2   | 1 1   | 1 |      |

| TU_BREIT | TU_LANG | VOLUMEN | IBG_PT | HVA_U | HVA_U_F | VMA_U | VMA_U_F | NSE | NSE_WERT | ZUFALL | TUMORSCHW |
|----------|---------|---------|--------|-------|---------|-------|---------|-----|----------|--------|-----------|
| 8,5      | 11,4    | 237,4   | 2      | 3     |         | 9     |         | 2   | 21,1     | 1      | 0         |
| 3,5      | 5       | 35      | 3      | 9     |         | 9     |         | 1   | 16,4     | 1      | 0         |
| 5,3      | 9,1     | 142,2   | 9      | 2     | 2,31    | 2     | 1,43    | 2   | 16,2     | 0      | 0         |
| 7        | 10      | 280     |        | 2     | 1,17    | 9     | 0,62    | 3   |          | 0      | 0         |
| 13,4     | 11,3    | 1022    | 9      | 2     |         | 2     |         | 0   |          | 1      | 0         |
|          |         |         |        |       |         |       |         |     |          | 0      | 0         |
| 3        | 4       | 24      | 9      | 2     |         | 9     |         | 2   | 17,52    | 0      | 0         |
| 10       | 22      | 1100    | 3      | 2     |         | 9     |         | 2   | 28,4     | 1      | 1         |
| 12       | 16      | 768     | 9      | 2     |         | 9     |         | 1   | 16       | 1      | 0         |
| 4,6      | 7,6     |         |        |       |         |       |         |     |          | 0      | 0         |
| 3,5      | 6       | 36,7    | 3      | 9     |         | 9     |         | 3   |          | 1      | 0         |
| 4        | 5       | 30      | 9      | 9     |         | 9     |         | 9   | 18       | 1      | 0         |
| 6,6      | 11      | 280     | 0      | 9     |         | 9     |         | 0   |          | 1      | 0         |
|          |         | 9       |        | 9     |         | 9     |         | 2   | 32,3     | 1      | 0         |
| 9,5      | 10,5    | 419     | 9      | 2     |         | 9     |         | 3   |          | 1      | 0         |
| 6        | 8,5     | 178,5   | 2      | 2     |         | 2     |         | 2   | 36,4     | 0      | 0         |
| 5,4      | 5       | 156,6   | 9      | 9     |         | 9     |         | 2   | 21       | 1      | 0         |
| 7,8      | 13,4    | 541     | 9      | 9     | 0,98    | 9     | 0,54    | 9   | 8,4      | 1      | 0         |
| 9,7      | 15,5    | 880     | 9      | 1     |         | 9     |         | 1   | 20,2     | 1      | 0         |
| 3        | 3       | 13,5    | 9      | 9     |         | 2     |         | 2   | 34,8     | 0      | 0         |
| 5,6      | 6,7     | 118,2   | 3      | 3     |         | 3     |         | 3   |          | 1      | 0         |
| 6        | 8       | 120     | 2      | 2     | 3,82    | 2     | 7,02    | 2   | 32,8     | 1      | 0         |
| 7        | 7       | 110     | 9      | 2     | 4,11    | 2     | 5,11    | 9   | 19,2     | 1      | 0         |
| 2,3      | 4,3     | 18,8    | 9      | 9     |         | 9     |         | 9   |          | 0      | 0         |
| 3,6      | 5,4     | 65      | 9      | 9     | 0,96    | 9     | 0,64    | 9   | 13,2     | 1      | 0         |
|          |         |         |        |       |         |       |         |     |          | 0      | 0         |
| 5,5      | 5,5     | 3       |        | 9     |         | 9     |         | 2   | 23       | 1      | 0         |
| 3,9      | 5       | 34,1    | 3      | 9     |         | 9     |         | 3   |          | 1      | 0         |
| 2        | 0,8     | 1,6     | 9      | 2     |         | 9     |         | 2   | 24       | 0      | 0         |
| 11,9     | 13,7    | 815,2   | 2      | 2     | 2,65    | 9     | 0,71    | 3   |          | 0      | 0         |
| 3        | 4       | 27      | 2      | 2     | 2,2     | 9     | 0,91    | 9   | 12,9     | 1      | 0         |
| 3,6      | 4,3     | 36,4    | 2      | 9     |         | 9     |         | 0   |          | 1      | 0         |
| 4        | 8,5     | 85      | 9      | 9     | 0,3     | 9     | 0,38    | 9   | 4,9      | 0      | 0         |
| 7,5      | 10,5    | 244,1   | 3      | 2     | 1,1     | 9     | 0,7     | 9   | 13,5     | 0      | 0         |
|          |         | 2       |        | 2     | 2,2     | 2     | 2,1     | 9   | 19,2     | 0      | 0         |
| 5,5      | 5,9     | 61,66   | 9      | 9     |         | 9     |         | 9   | 10,9     | 0      | 0         |
| 2,4      | 3       | 7,6     |        | 9     |         | 9     |         | 2   | 38,6     | 0      | 0         |
| 2,2      | 3,5     | 22,7    |        | 9     | 0,47    | 9     | 0,87    | 9   | 20       | 1      | 0         |
| 10       | 10      | 700     | 9      | 9     |         | 9     |         | 9   |          | 0      | 0         |
| 5        | 5       | 75      | 9      | 9     |         | 9     |         | 9   | 18       | 0      | 0         |
| 5,5      | 7       |         |        | 9     |         | 9     |         | 2   | 17       | 0      | 0         |
| 5,8      | 7,5     | 69,6    | 2      | 2     |         |       |         | 3   |          | 0      | 1         |

|      |      |         |   |         |        |      |   |   |
|------|------|---------|---|---------|--------|------|---|---|
| 5    | 5    |         | 0 | 0       |        |      | 1 | 0 |
| 3,9  | 9,4  | 84,3 3  | 9 | 9       | 0      |      | 1 | 0 |
| 6    | 8    | 72 9    | 9 | 9       | 1      | 16,7 | 1 | 0 |
| 4,7  | 4,5  | 32,8 3  | 9 | 9       | 9      |      | 1 | 0 |
| 15   | 18,5 | 1100    | 2 | 9       | 2      | 16,3 | 1 | 0 |
| 4    | 7,5  | 57 9    | 9 | 0,87 9  | 0,88 1 | 23,9 | 0 | 0 |
| 4    | 8    | 128 9   | 9 | 9       | 9      |      | 0 | 0 |
| 10   | 10   | 400 9   | 9 | 0,22 9  | 0,17 3 |      | 0 | 1 |
| 4    | 5    | 3       | 9 | 9       | 9      | 18,3 | 0 | 0 |
| 2,8  | 9,5  | 65,2 9  | 9 | 0,54 9  | 0,51 9 | 19,8 | 1 | 0 |
| 9    | 10   | 360 9   | 9 | 9       | 9      | 11,9 | 1 | 0 |
| 5    | 6    | 60 9    | 9 | 9       | 1      |      | 0 | 0 |
| 2,6  | 4,1  | 25,1 2  | 2 | 9       | 9      | 15,5 | 0 | 1 |
|      |      | 192 9   | 2 | 2       | 9      | 15   | 0 | 0 |
| 12,5 | 10   | 675 9   | 9 | 9       | 3      |      | 1 | 0 |
| 8,5  | 11,5 | 464,3 9 | 9 | 9       | 9      | 11,1 | 1 | 0 |
| 3,6  | 3,6  | 23,3 2  | 2 | 2       | 9      |      | 0 | 1 |
| 3    | 3    | 6,75 2  | 9 | 0,51 9  | 0,48 0 |      | 1 | 0 |
| 8    | 6    | 264 9   | 9 | 9       | 9      | 20,4 | 0 | 0 |
| 2,2  | 6,3  | 9       | 9 | 0,36 9  | 0,29 2 | 49,7 | 0 | 0 |
| 6    | 6    | 9       | 9 | 0,35 9  | 0,37 9 | 24   | 0 | 0 |
| 2,6  | 3,4  | 27,8 3  | 9 | 0,77 9  | 0,78 2 | 25,6 | 0 | 0 |
| 3,5  | 4,2  | 16,1 3  | 9 | 9       | 9      | 13,9 | 1 | 0 |
| 12,5 | 14   | 831,3 2 | 2 | 8,1 2   | 2,6 9  | 13,7 | 1 | 0 |
| 5,3  | 5,6  | 75      | 9 | 9       | 9      | 21,5 | 0 | 0 |
| 6    | 7    | 168     |   |         | 2      | 37,6 | 1 | 0 |
| 4,7  | 9,8  | 145,1 3 | 9 | 9       | 3      |      | 1 | 0 |
| 3,8  | 6,6  | 45 9    | 9 | 9       | 2      | 27,9 | 1 | 0 |
| 3    | 2,5  | 6 9     | 9 | 9       | 9      | 15,1 | 0 | 0 |
| 9    | 7    | 252 0   | 2 | 2       | 2      | 20,5 | 1 | 0 |
|      |      |         |   |         |        |      |   |   |
| 3    | 4    | 15 2    | 2 | 1,3 2   | 1,3 9  | 15   | 0 | 0 |
| 4,2  | 3,2  | 28      | 9 | 9       |        |      | 0 | 0 |
| 5    | 3,5  | 54,5 2  | 9 | 9       | 3      |      | 0 | 0 |
| 6    | 10   | 180 2   | 9 | 9       | 9      |      | 1 | 0 |
| 3,5  | 5    | 26,25 0 | 9 | 9       | 3      |      | 0 | 0 |
| 3,5  | 5,5  | 14,5 9  | 9 | 9       | 9      |      | 1 | 0 |
| 3,5  | 4    | 21 3    | 3 | 3       | 9      | 15,3 | 1 | 0 |
| 7,5  | 9,3  | 240,6 9 | 2 | 1,5 2   | 1,5 2  | 29,3 | 1 | 0 |
| 4,5  | 5    | 106,9 9 | 9 | 9       | 2      | 26   | 1 | 0 |
| 8    | 10,1 | 290,8 3 | 3 | 9       | 2      | 13,3 | 0 | 1 |
| 4    | 7,5  | 67,5 3  | 9 | 9       | 3      |      | 1 | 0 |
| 2,9  | 4,1  | 30,3 9  | 9 | Page 21 | 9      | 11,7 | 0 | 0 |

|     |      |         |   |         |        |       |   |   |
|-----|------|---------|---|---------|--------|-------|---|---|
| 9   | 12   | 378 0   | 2 | 1,41 9  | 0,87 9 | 8,9   | 0 | 0 |
| 4,8 | 6,5  | 56,2 9  | 9 | 9       |        |       | 1 | 0 |
| 2,5 | 4,5  | 12,4 2  | 2 | 2 9     |        |       | 0 | 1 |
| 9   | 14   | 504 9   | 2 | 3,88 9  | 0,7 3  |       | 1 | 0 |
| 5   | 6    | 90 9    | 9 | 9       | 9      | 9,2   | 0 | 0 |
| 4   | 4    | 24 9    | 9 | 9       |        |       | 0 | 1 |
| 2,7 | 3,2  | 20      |   |         | 2      |       | 0 | 0 |
| 4,3 | 6    | 61,92 9 | 9 | 9       | 9      | 16    | 0 | 0 |
| 4,8 | 9    | 86,4 1  | 0 | 0       | 2      |       | 0 | 0 |
| 7   | 8    | 87      | 9 | 9       | 9      |       | 0 | 0 |
| 4,7 | 5    | 3       | 9 | 9       | 3      |       | 1 | 0 |
| 7   | 5    | 9       | 2 | 2       | 3      |       | 1 | 0 |
| 6,6 | 9    | 9       | 2 | 3 2     | 2 9    | 19,82 | 0 | 0 |
| 6,2 | 7,3  | 88 9    | 9 | 9       | 9      | 14,1  | 0 | 0 |
| 8,5 | 8,5  | 155 2   | 9 | 9       | 9      | 24,2  | 0 | 0 |
| 5   | 3    | 30 9    | 9 | 9       | 9      | 13,5  | 0 | 0 |
| 2,6 | 4,4  | 13,1 9  | 0 | 0       | 0      |       | 0 | 1 |
| 5,1 | 10,5 | 80,3 9  | 9 | 0,76 9  | 0,31 2 | 30,9  | 0 | 0 |
| 8,5 | 8,5  | 170 9   | 2 | 9       | 9      |       | 0 | 0 |
| 2,6 | 3,3  | 14,5 3  | 9 | 9       | 2      | 17,6  | 0 | 0 |
| 7,2 | 6,3  | 150 2   | 3 | 3       | 9      | 10,7  | 1 | 0 |
| 10  | 10   | 450 2   | 9 | 0,99 9  | 0,51 9 | 7,8   | 0 | 0 |
| 8   | 9    | 288 2   | 2 | 4,28 2  | 2,52 2 | 16,1  | 0 | 0 |
| 15  | 12   | 900 9   | 9 | 9       | 2      | 39    | 0 | 1 |
|     |      | 9       | 9 | 9       | 2      | 21,6  | 1 | 0 |
| 2   | 8    | 40 9    | 9 | 9       | 9      | 6,5   | 1 | 0 |
| 4   | 4    | 35 9    | 9 | 9       | 9      | 6     | 1 | 0 |
| 4,3 | 6,6  | 75 9    | 2 | 1,07 2  | 1,2 9  | 13    | 0 | 0 |
| 2,6 | 4,6  | 15 3    | 9 | 9       | 2      | 14,3  | 0 | 0 |
| 3,4 | 5,7  | 9       | 9 | 0,81 9  | 0,45 9 | 19,7  | 0 | 0 |
| 7   | 12   | 210 9   | 9 | 0,45 9  | 0,38 2 | 18,9  | 0 | 0 |
|     |      | 2       | 9 | 9       | 9      | 9,1   | 0 | 0 |
| 13  | 11   | 680 3   | 9 | 9       | 9      |       | 0 | 0 |
| 9   | 13   | 409 3   | 9 | 0,28 9  | 0,18 9 | 14,6  | 0 | 0 |
| 5   | 5,7  | 114 9   | 9 | 9       | 2      | 19    | 0 | 0 |
|     |      | 3       | 9 | 9       | 2      | 17    | 1 | 0 |
| 7,8 | 7,7  | 282 9   | 2 | 2       | 2      | 14,13 | 1 | 0 |
| 4   | 4    | 32 9    | 2 | 9       | 9      | 8,29  | 0 | 0 |
| 3,7 | 6,5  | 90 2    | 2 | 9       | 9      | 20,3  | 0 | 0 |
| 4,5 | 5    | 33,8 9  | 9 | 9       | 2      | 38,4  | 0 | 0 |
| 3,8 | 4,2  | 44,7 9  | 2 | 2       | 3      |       | 0 | 0 |
| 8,3 | 13,1 | 326 9   | 2 | Page 22 | 2      | 35    | 0 | 0 |

|     |      |         |   |        |         |      |   |
|-----|------|---------|---|--------|---------|------|---|
| 2,5 | 4    | 9 3     | 3 | 3      | 3       | 1    | 0 |
| 3   | 4    | 19,2 3  | 3 | 3      | 9       | 16   | 0 |
|     |      | 9       | 9 | 9      | 9       |      | 0 |
| 4   | 5    | 56 9    | 9 | 9      | 2       | 24,6 | 0 |
| 4   | 4,5  | 34,2 1  | 2 | 9      | 1       | 25,7 | 0 |
| 7   | 10   | 140 9   | 9 | 0,83 9 | 0,81 2  | 21,1 | 0 |
| 6,5 | 7,5  | 105 2   | 2 | 3,77 2 | 16,06 9 | 13,5 | 0 |
| 7,7 | 9,2  | 9       | 9 | 9      | 9       | 11,8 | 0 |
| 3,5 | 4    | 18,2 3  | 9 | 0,5 9  | 0,64 9  | 21   | 0 |
| 2   | 5,5  | 21,7 9  | 9 | 0,31 9 | 0,54 9  | 16,2 | 0 |
| 7   | 5    | 157,5 2 | 9 | 2      | 2       | 23   | 0 |
| 8,4 | 7,5  | 768,6 3 | 9 | 9      | 3       |      | 1 |
| 2,4 | 5    | 30 9    | 9 | 0,48 9 | 0,42 9  | 19,7 | 0 |
| 6   | 6    | 72 0    | 9 | 9      | 2       | 16,7 | 0 |
| 3,5 | 3,5  | 12,3 3  | 9 | 0,46 9 | 0,17 2  | 18,2 | 0 |
| 4,5 | 8,5  | 66,9 9  | 9 | 9      | 2       | 34,9 | 1 |
|     |      | 9       | 2 | 1,36 9 | 0,91 2  | 23,3 | 0 |
| 3,3 | 5,7  | 40,9 9  | 9 | 9      | 2       | 35,5 | 0 |
| 3   | 9    | 25,7 9  | 9 | 9      | 2       | 37,2 | 1 |
| 11  | 13,5 | 742,5 9 | 2 | 2,86 2 | 1,88 1  | 18,7 | 1 |
|     |      |         |   |        |         | 0    | 0 |
| 5,2 | 6,7  | 174,2 2 | 2 | 2      | 2       | 33   | 0 |
| 4   | 6    | 96 3    |   |        | 9       | 11,4 | 0 |
| 5,5 | 6,5  | 160,8 9 | 9 | 9      | 3       |      | 0 |
| 2,9 | 5,6  | 16,2 2  | 9 | 9      | 9       | 19   | 0 |
|     |      | 9       | 2 | 2      | 2       | 23,7 | 1 |
| 6,3 | 6    | 160,6 3 | 2 | 2      | 9       | 8,4  | 0 |
| 3,6 | 2,8  | 21,2 9  | 9 | 0,37 9 | 0,61 2  | 28,6 | 0 |
| 6   | 7    | 147 9   | 9 | 0,51 9 | 0,55 9  | 12,5 | 0 |
| 2,5 | 3,1  | 6,6 3   | 9 | 9      | 2       | 24,8 | 0 |
| 6,5 | 9,6  | 196 2   | 2 | 3,12 2 | 1,92 3  |      | 0 |
| 2,2 | 1,6  | 8,6 9   | 9 | 0,49 9 | 0,9 9   | 14,9 | 0 |
| 3   | 5    | 17 9    | 9 | 9      | 2       | 18   | 0 |
| 4,2 | 5,5  | 26,6 9  | 9 | 9      | 9       | 19   | 0 |
| 3,3 | 5,5  | 2       | 2 | 1,09 9 | 0,73 9  | 14,5 | 0 |
| 3   | 1    | 1,5 9   | 9 | 0,52 9 | 0,41 9  |      | 0 |
| 3   | 5    | 30 3    | 9 | 9      | 2       | 22   | 0 |
| 7,3 | 6,3  | 243 2   | 9 | 0,89 9 | 0,53 2  | 23,2 | 0 |
| 2,2 | 3,3  | 9,4 2   | 9 | 9      | 2       | 21   | 0 |
| 5   | 6    | 165 9   | 2 | 9      | 9       |      | 1 |
| 4,5 | 6,6  | 63,8 9  | 1 | 9      | 9       | 10   | 0 |
| 3,2 | 3,6  | 8,2 2   |   |        |         |      | 0 |
| 3,1 | 1,6  | 4,6     | 9 |        |         | 10,6 | 0 |

|      |      |       |   |      |      |      |      |      |      |   |   |
|------|------|-------|---|------|------|------|------|------|------|---|---|
| 3,5  | 3,6  | 20,2  | 2 | 2    | 3    | 0    | 0    |      |      |   |   |
| 8    | 11   | 2     | 2 | 1,91 | 2    | 9,8  | 0    | 0    |      |   |   |
| 16   | 16,5 | 594   | 2 | 5,7  | 2    | 3,6  | 2    | 25,6 | 1    | 0 |   |
| 4    | 5    | 40    | 2 |      | 2    |      | 2    | 30,9 | 1    | 0 |   |
| 4,5  | 5,8  | 49,6  | 3 | 2    | 9    |      | 9    | 17,3 | 0    | 0 |   |
| 7,5  | 7,5  | 160   | 9 | 2    | 2    |      | 2    | 22   | 1    | 0 |   |
| 2    | 12   | 72    | 3 | 9    | 2    |      | 2    | 12,6 | 1    | 0 |   |
| 4,7  | 5,5  | 56,9  |   | 9    | 2    |      | 2    | 41,1 | 1    | 0 |   |
| 3,3  | 3,7  | 2     | 1 | 0,84 | 2    | 1,27 | 1    | 19   | 0    | 0 |   |
|      |      | 3     | 9 | 0,18 | 9    | 0,21 | 3    |      | 1    | 0 |   |
| 6,3  | 6,6  | 170,5 | 9 | 2    | 9    |      | 9    | 14,2 | 0    | 1 |   |
| 3    | 3,4  |       | 9 | 0,54 | 9    | 0,84 | 3    |      | 1    | 0 |   |
| 3,5  | 4    | 17,5  | 9 | 2    | 1,43 | 9    | 2    | 23,9 | 0    | 1 |   |
|      |      |       |   |      |      |      | 9    |      | 1    | 0 |   |
| 4,2  | 5    | 42    | 2 | 2    | 9    |      | 9    | 14   | 1    | 0 |   |
|      |      | 2     | 2 | 1,6  | 2    | 1,25 | 2    | 38,8 | 0    | 0 |   |
| 3    | 4,5  | 13    | 3 | 9    | 9    |      | 9    | 14,3 | 0    | 0 |   |
| 6    | 8,5  | 102   | 2 | 3    | 3    |      | 3    |      | 1    | 0 |   |
| 12,5 | 9    | 871,9 | 9 | 2    | 9    |      | 0    | 14,8 | 1    | 0 |   |
| 3,6  | 5,5  | 43,6  | 1 | 2    | 2    |      | 3    |      | 0    | 0 |   |
| 7    | 8,5  | 163,6 | 3 | 2    | 9    |      | 9    | 15,2 | 1    | 0 |   |
|      |      | 0     | 9 | 9    | 9    |      | 9    | 9,6  | 0    | 0 |   |
| 4    | 4    | 48    | 9 | 2    | 2    |      | 3    |      | 1    | 0 |   |
|      |      | 9     | 9 | 9    | 9    |      | 9    |      | 0    | 0 |   |
|      |      |       |   |      |      |      |      |      | 1    | 0 |   |
| 5    | 7    | 52,5  | 0 | 0    | 0    |      | 0    |      | 0    | 1 |   |
| 4,4  | 4,6  | 38,5  | 2 | 2    | 2    |      | 2    | 9,5  | 0    | 0 |   |
| 4    | 7    | 28    | 2 | 2    | 2    |      | 9    | 16,7 | 1    | 0 |   |
| 2,5  | 4,5  | 11,3  | 3 | 3    | 3    |      | 3    |      | 0    | 0 |   |
| 3,6  | 3,8  | 17,1  | 2 | 9    | 9    |      | 2    | 23,1 | 0    | 0 |   |
| 2,4  | 3,5  | 8,4   | 2 | 9    | 2    |      | 1,3  | 2    | 22,1 | 1 | 0 |
| 6    | 5,5  | 132   | 3 | 9    | 9    |      | 2    | 13   | 1    | 0 |   |
|      |      | 290   | 2 | 2    | 7,87 | 2    | 3,72 | 2    | 38,5 | 1 | 0 |
| 5    | 11   | 240   | 2 | 2    | 2    |      | 3    |      | 1    | 0 |   |
| 4    | 9    | 63    | 9 | 2    | 2    |      | 2    | 37,1 | 1    | 0 |   |
| 5    | 9,1  | 97,8  | 2 | 2    | 2    |      | 2    | 21,9 | 0    | 1 |   |
| 3,9  | 9,2  | 64,6  | 9 | 9    | 9    |      | 9    | 12   | 1    | 0 |   |
|      |      | 2     | 2 | 2,3  | 2    |      | 1,6  | 2    | 26,4 | 0 | 0 |
| 5    | 9    | 157   |   | 2    | 4,96 | 2    | 6,69 | 2    | 30,8 | 0 | 1 |
| 1,7  | 2,8  | 10,9  | 9 | 9    | 9    |      | 9    | 12,9 | 1    | 0 |   |
| 4,1  | 4,5  | 35    | 3 | 9    | 9    |      | 9    | 12,5 | 1    | 0 |   |
| 8    | 5    | 140   | 3 | 3    | 3    |      | 3    |      | 0    | 0 |   |
| 5,7  | 9,1  | 339,8 | 2 | 2    | 3,8  | 2    | 3,8  | 2    | 49   | 0 | 1 |

|     |      |         |   |        |        |       |   |   |
|-----|------|---------|---|--------|--------|-------|---|---|
| 7,5 | 14   | 315 9   | 2 | 2      | 2      | 23,4  | 1 | 0 |
|     |      | 3       | 2 | 2      | 3      |       | 0 | 0 |
| 5,7 | 10,5 | 149,6 2 | 2 | 1,46 2 | 1,56 2 | 24    | 0 | 0 |
| 3,5 | 4,5  | 19,7 3  | 9 | 0,68 9 | 0,79 9 | 18,9  | 0 | 0 |
| 6   | 8    | 96 2    | 2 | 2,86 2 | 3,46 9 | 61,6  | 1 | 0 |
| 5   | 5,5  | 34,4 2  | 9 | 2      | 2      | 15,3  | 1 | 0 |
| 1,5 | 1,8  | 1,9 9   | 9 | 9      | 2      | 29,6  | 0 | 0 |
| 1,5 | 1,7  | 4,6 2   | 2 | 2      | 2      | 42,4  | 0 | 0 |
| 2,9 | 6    | 2       | 2 | 1,38 2 | 3,27 2 | 22,2  | 0 | 1 |
| 7   | 9    | 78,8 2  | 2 | 4,5 2  | 5,97 2 | 125,6 | 0 | 0 |
| 2,6 | 3,2  | 7,5 2   | 9 | 9      | 2      | 28    | 0 | 0 |
| 5   | 5    | 62,5 2  | 2 | 2      | 2      | 24,9  | 0 | 0 |
| 4,5 | 6    | 36 3    | 9 | 2      | 9      | 46,6  | 1 | 0 |
| 2,6 | 3,4  | 21 2    | 9 | 0,56 9 | 0,91 2 | 39,8  | 0 | 1 |
|     |      | 12,4 2  | 2 | 2      | 2      | 33    | 1 | 0 |
| 3,8 | 3,2  | 28 2    | 2 | 2      | 2      | 57    | 1 | 0 |
| 1,7 | 3    | 8,2 1   | 9 | 9      | 2      | 34    | 0 | 0 |
| 5,4 | 5,7  | 78 2    | 2 | 2      | 2      | 176,7 | 0 | 1 |
| 6   | 4    | 2       | 2 | 2      | 2      | 57,1  | 1 | 0 |
| 1,8 | 1,8  | 3,2 2   | 9 | 9      | 2      | 39,9  | 1 | 0 |
| 2,9 | 3,2  | 20 2    | 9 | 2      | 2      | 23    | 0 | 0 |
| 2,7 | 3,8  | 15,9 2  | 2 | 2      | 3      |       | 1 | 0 |
| 2,3 | 3,1  | 7,8 3   | 9 | 9      | 9      | 19,5  | 1 | 0 |
|     |      | 0       | 2 | 2      | 2      | 68    | 0 | 1 |
| 2,8 | 3,6  | 11 3    | 2 | 2      | 3      |       | 0 | 0 |
| 3,5 | 3    | 25 1    | 2 | 2      | 2      | 36,1  | 1 | 0 |
| 3,2 | 3,3  | 25 3    | 9 | 0,58 9 | 0,77 2 | 21,2  | 1 | 0 |
| 4,5 | 5,5  | 55,6 3  | 2 | 2      | 0      |       | 1 | 0 |
| 4,8 | 6    | 74,9 2  | 2 | 2      | 2      | 63,9  | 1 | 0 |
| 1,4 | 3,8  | 4,7 3   | 3 | 3      | 3      |       | 0 | 0 |
| 3   | 3    | 13      |   |        | 2      | 23,9  | 0 | 1 |
|     |      | 9       | 2 | 2      | 2      | 15    | 0 | 0 |
| 7,3 | 9,1  | 239,1 2 | 2 | 2      | 9      | 19    | 0 | 1 |
| 2,4 | 2,3  | 7 3     | 9 | 0,72 9 | 0,55 3 |       | 0 | 0 |
| 5   | 6    | 2       | 9 | 9      | 2      | 214   | 0 | 0 |
| 1   | 4    | 6 9     | 9 | 0,52 9 | 0,31 1 | 13,6  | 0 | 0 |
| 1   | 1,7  | 2,8 2   | 9 | 9      | 2      | 22,8  | 0 | 0 |
|     |      | 75,3 2  | 2 | 2      | 2      | 61    | 0 | 0 |
| 5,3 | 5    | 94 2    | 9 | 0,96 2 | 2,04 2 | 122,3 | 0 | 1 |
| 9,5 | 11   | 564,3 2 | 2 | 2      | 2      | 54,8  | 0 | 0 |
| 6   | 3    | 54 3    | 3 | 3      | 2      | 21,4  | 0 | 0 |
| 1,2 | 4,6  | 3,3 2   | 2 | 2      | 2      | 27,1  | 0 | 0 |
| 1,6 | 1,5  | 1       | 2 |        | 2      | 15,3  | 0 | 0 |

|      |     |         |   |        |         |       |   |   |
|------|-----|---------|---|--------|---------|-------|---|---|
| 2,7  | 4,7 | 15,3 2  | 2 | 2 2    | 3 2     | 42,2  | 1 | 0 |
| 3,1  | 3,2 | 18,4 3  | 2 | 9      | 2       | 28    | 1 | 0 |
|      |     | 2       | 9 | 0,33 9 | 0,31 2  | 28,9  | 0 | 0 |
| 11,4 | 19  | 747,3 2 | 2 | 9      | 2       | 2054  | 0 | 1 |
| 11,6 | 15  | 957 2   | 2 | 3,36 2 | 7,17 2  | 399,2 | 0 | 0 |
| 6,8  | 7,4 | 111 2   | 2 | 2      | 2       | 77,9  | 1 | 0 |
|      |     | 3       | 9 | 0,59 9 | 0,72 9  | 17,1  | 1 | 0 |
| 2,4  | 2,7 | 5,8 2   | 9 | 9      | 2       | 28,5  | 1 | 0 |
| 4    | 4,8 |         | 9 | 0,53 9 | 0,24    |       | 0 | 0 |
| 2,1  | 3,5 | 4,4     | 9 | 0,4 9  | 0,48 9  | 13    | 0 | 0 |
|      |     |         |   |        |         |       | 1 | 0 |
| 7,1  | 9   | 180 2   | 5 | 0,99 2 | 3,08    |       | 0 | 1 |
| 4,6  | 4,2 | 40 2    | 9 | 0,93 2 | 1,55 9  | 10,8  | 1 | 0 |
| 2,5  | 3,5 | 10,9 2  | 2 | 2      | 2       | 22    | 1 | 0 |
|      |     | 46 2    | 2 | 2      | 1       | 15    | 1 | 0 |
| 5    | 8   | 100 2   | 2 | 2      | 2       | 40,6  | 1 | 0 |
| 2    | 2   | 4 2     | 9 | 9      | 2       | 28,4  | 1 | 0 |
| 6    | 6   | 72 2    | 2 | 1,7 2  | 2,73    |       | 1 | 0 |
| 8,5  | 8   | 238 2   | 2 | 2,64 2 | 4,44 0  |       | 1 | 0 |
| 5,2  | 6,3 | 90 2    | 2 | 2      | 3       |       | 1 | 0 |
| 5,5  | 6,5 | 70 0    | 9 | 9      | 2       | 34,5  | 1 | 0 |
| 3,2  | 2,8 | 15,7 2  | 9 | 0,73 2 | 1 1     | 20    | 1 | 0 |
| 7,5  | 9   | 170 9   | 9 | 9      | 2       | 53,9  | 0 | 0 |
| 2,1  | 2,7 | 2       | 2 | 2      | 9       | 21,4  | 1 | 0 |
| 3    | 3   | 6,75 2  | 2 | 2      | 2       | 52,8  | 1 | 0 |
| 4,4  | 5,7 | 62,7 2  | 2 | 2,8 2  | 2,1 2   | 30,4  | 1 | 0 |
| 4    | 4,4 | 35,2 9  | 9 | 9      | 9       | 12,35 | 1 | 0 |
| 5    | 6   | 75 2    | 2 | 9      | 2       | 23,7  | 1 | 0 |
| 4    | 5   | 20 2    | 2 | 3,68 2 | 25,36 3 |       | 1 | 0 |
| 3,8  | 6   | 46,7    | 2 | 2      | 2       | 29,2  | 0 | 0 |
| 3,5  | 6   | 47,3 2  | 2 | 1,56 2 | 1,91 2  | 81,2  | 0 | 0 |
| 4,8  | 6,2 | 81,8 2  |   |        | 2       | 27,7  | 1 | 0 |
| 8    | 6   | 144 2   | 2 | 4,9 2  | 6,8 2   | 62    | 1 | 0 |
| 5    | 5,5 | 57,8 2  | 2 | 3,78 2 | 8,03 2  | 31,3  | 1 | 0 |
| 3,4  | 4,6 | 32,8 2  | 2 | 1,56 2 | 1,19    |       | 1 | 0 |
| 5    | 5   | 62,5    | 2 | 2      |         |       | 1 | 0 |
|      |     | 3       |   |        | 9       |       | 0 | 0 |
| 3,5  | 5   | 17,5    | 2 | 9      | 9       | 13,9  | 1 | 0 |
| 7    | 6   | 130 2   | 2 | 2      | 9       | 13,9  | 0 | 0 |
| 5    | 6,5 | 100 2   | 9 | 0,83 2 | 1,22 3  |       | 0 | 0 |
| 1,5  | 3,6 | 10      | 2 | 1,62 2 | 1,94 9  | 15,4  | 1 | 0 |
| 1,8  | 3,6 | 4,9     | 9 | 0,92 2 | 1,29    |       | 0 | 0 |
| 1,8  | 2   | 2,7 3   | 9 |        | 2       | 44,2  | 1 | 0 |

|     |      |         |   |        |        |       |   |   |
|-----|------|---------|---|--------|--------|-------|---|---|
| 3,9 | 5    | 35,1    | 2 | 2      | 2      | 36,65 | 0 | 0 |
| 4   | 4    | 33,6 2  | 2 | 2      | 9      | 21,3  | 0 | 0 |
| 5,5 | 5    | 59,1 3  | 2 | 2      | 2      | 60,3  | 0 | 1 |
| 4,3 | 3,1  | 25,33 2 | 9 | 0,54 9 | 0,49 2 | 130   | 1 | 0 |
|     |      |         | 2 | 4,93 2 | 5,71 2 | 52,3  | 0 | 0 |
| 4,1 | 5,2  | 40,5 9  | 9 | 9      | 9      | 9,3   | 1 | 0 |
| 2,5 | 3,2  | 18 3    | 9 | 9      | 2      | 35    | 0 | 0 |
| 5   | 5    | 46,2 2  | 9 | 2      | 2      | 21,3  | 1 | 0 |
| 3,5 | 2,8  | 19 2    | 9 | 2      | 1      | 20    | 1 | 0 |
| 4,3 | 5,3  | 20,6 2  | 9 | 0,9 9  | 0,79   |       | 1 | 0 |
| 6   | 6    | 153 2   | 2 | 5,27 2 | 3,83 2 | 35    | 1 | 0 |
| 4,4 | 3,6  | 23 2    | 1 | 0,48 1 | 1,44 9 | 13,2  | 1 | 0 |
| 4   | 5    | 45 2    | 2 | 3,8 2  | 1,5 0  |       | 1 | 0 |
| 5   | 5    | 87,5 9  | 2 | 2      | 9      | 19    | 1 | 0 |
| 2   | 2,2  | 4,8 2   | 9 | 9      | 9      | 8,9   | 1 | 0 |
| 6   | 7    | 126 2   | 2 | 2      | 3      |       | 0 | 0 |
|     |      |         |   |        |        |       | 1 | 0 |
|     | 3,5  | 24      |   |        |        |       | 1 | 0 |
| 4,3 | 4,7  | 49,5 2  | 2 | 1,78 2 | 3,96 9 | 15,2  | 1 | 0 |
| 3   | 3,3  | 14 2    | 9 | 9      | 9      | 22,2  | 1 | 0 |
| 2,2 | 4    | 7,5 2   | 9 | 0,69 9 | 0,88 9 | 19,7  |   |   |
| 6   | 6    | 54 2    | 2 | 2,2 2  | 2 9    | 16,7  | 0 | 0 |
| 3,5 | 5,5  | 2       | 2 | 2      | 2      | 92    | 1 | 0 |
| 3,2 | 3,3  | 15,3 2  | 2 | 0      | 2      |       | 0 | 0 |
| 6,5 | 11,5 | 242 2   | 2 | 2,86 2 | 5,02 2 | 75,1  | 0 | 1 |
| 2,3 | 4,2  | 16,4 2  | 2 | 1,01 9 | 0,79 9 | 17,4  | 1 | 0 |
|     |      | 2       | 2 | 2      |        |       | 0 | 1 |
|     |      | 3       | 9 | 0,96 2 | 1,12 2 | 68    | 0 | 1 |
|     |      |         | 2 | 2      | 9      |       | 1 | 0 |
|     |      | 2       | 2 | 2      | 2      | 370   | 0 | 1 |
| 2,2 | 3,5  | 8,5 2   | 2 | 2      | 9      | 11,2  | 1 | 0 |
| 9,5 | 12,5 | 385 2   | 2 | 25 2   | 25 2   | 24,2  | 0 | 1 |
| 2,9 | 4,5  | 17,6 2  | 9 | 2      | 2      | 31    | 1 | 0 |
| 1,3 | 3,5  | 7,5 2   | 9 | 0,51 9 | 0,43 2 | 99    | 0 | 0 |
| 8   | 12   | 336 2   | 2 | 2,06 2 | 4,21 2 | 186   | 1 | 0 |
| 4,5 | 5,5  | 43,3 2  | 3 | 3      | 2      | 36,4  | 0 | 1 |
| 2,7 | 3,5  | 9,45 2  | 2 | 1,8 2  | 4 2    | 17,3  | 1 | 0 |
| 11  | 11   | 726 2   | 1 | 0,99 9 | 0,62 2 | 864   | 0 | 0 |
|     |      | 2       | 2 | 2      | 2      | 157   | 0 | 1 |
| 7,9 | 6    | 130,4 2 | 2 | 2      | 2      | 114   | 1 | 0 |
| 3,3 | 3,1  | 20,5 2  | 2 | 1,08 2 | 1,79 2 | 33,1  | 1 | 0 |
| 3,4 | 8,5  | 46,2 2  |   | 2      | 2      | 70,7  | 0 | 1 |
| 2,6 | 3,9  | 20,3 2  | 9 |        | 9      | 21,3  | 1 | 0 |

|      |     |         |   |         |         |      |   |   |
|------|-----|---------|---|---------|---------|------|---|---|
| 12   | 24  | 1500 2  | 2 | 2,35 9  | 0,42 3  | 0    | 0 |   |
| 3,5  | 4,5 | 23,6 0  |   |         | 9       | 14,6 | 1 | 0 |
| 2,5  | 4,2 | 15,8 9  | 2 | 2,76 2  | 5,03 3  | 0    | 0 |   |
| 9,1  | 7,2 | 147,4 2 | 2 | 0       | 0 2     | 44,6 | 1 | 0 |
| 2    | 6   | 15 9    | 2 | 1,14 2  | 1,56 9  | 15,1 | 1 | 0 |
| 5,8  | 6,2 | 111,5 2 | 2 | 2,31 9  | 0,42 3  |      | 1 | 0 |
| 6    | 2,5 | 52,5    | 2 | 1,8 2   | 1,53 2  | 34,9 | 1 | 0 |
| 5,5  | 13  | 257,4 2 | 2 | 9,31 2  | 40,27 2 | 86,8 | 0 | 0 |
| 2,5  | 2,5 | 2       | 9 | 0,5 9   | 0,85 9  | 9    | 1 | 0 |
|      |     | 2       | 2 | 2       | 2       | 56,1 | 0 | 1 |
|      |     | 7,5 2   | 9 | 2       | 9       | 9,9  | 1 | 0 |
| 4,2  | 6   | 63 2    | 2 | 2       | 2       | 54,7 | 0 | 1 |
| 3    | 4,7 | 42,3 2  | 2 | 1,86 2  | 2,52 2  | 33,8 | 1 | 0 |
| 11,5 | 13  | 710,1 2 | 2 | 5,9 2   | 5,4 2   | 1047 | 0 | 0 |
| 8    | 7   | 280 2   | 2 | 2       | 9       | 15,5 | 0 | 1 |
|      |     |         |   |         |         |      | 1 | 0 |
| 3,5  | 1,1 | 7,3 2   | 9 | 2       | 2       | 32,5 | 0 | 0 |
| 4,9  | 5   | 55,1 2  | 2 | 2       |         |      | 1 | 0 |
| 4    | 5,7 | 45,6    | 9 | 0,79 9  | 0,45 2  | 30,7 | 0 | 1 |
| 4    | 4,1 | 35 0    | 2 | 1,5 2   | 2,89 2  | 48,9 | 1 | 0 |
| 5,5  | 5,1 | 74 3    | 9 | 9       | 2       | 70,2 | 1 | 0 |
| 2,2  | 4   | 30,8 2  | 2 | 2       |         |      | 1 | 0 |
| 5    | 6   | 45 2    | 2 | 1,14 2  | 1,74 2  | 42,1 | 1 | 0 |
| 1,7  | 4   | 3,5 2   | 9 | 0,36 9  | 0,69 2  | 20,3 | 0 | 0 |
|      |     | 9       | 2 | 1,14 2  | 1,16 2  | 28,8 | 1 | 0 |
| 4    | 6   | 30 2    | 2 | 1,48 2  | 1,46 3  |      | 1 |   |
| 5,5  | 4,5 | 86,6 3  | 2 | 1,46 2  | 1,02 9  | 14,7 | 0 | 1 |
| 4    | 4   | 24 3    | 9 | 1       | 2       | 61,7 | 1 | 0 |
| 5    | 4   | 2       | 2 | 1,49 2  | 1,74 2  |      | 1 | 0 |
| 3    | 6   | 45 2    | 2 | 1,21 9  | 0,95 2  | 70,2 | 0 | 1 |
| 3    | 2,5 | 15 2    | 2 | 2       | 9       | 20,6 | 0 | 1 |
| 7    | 8   | 112 2   | 2 | 2 2     | 3,6 2   | 34,7 | 0 | 0 |
| 1,5  | 3   | 5,62 2  | 9 | 0,67 9  | 0,74 2  | 66   | 1 | 0 |
|      |     | 2       | 9 | 9       |         |      | 1 | 0 |
| 2,1  | 2,1 | 6,6 2   | 9 |         | 9       | 15   | 0 | 0 |
| 4,9  | 6,3 | 75,6 3  | 9 | 9       | 2       | 69,1 | 0 | 0 |
| 2,3  | 2,7 | 8,7 2   | 9 | 1       | 2       | 16,9 | 1 | 0 |
| 4,6  | 5,6 | 74,7 2  | 2 | 2,5 2   | 2,5 2   |      | 1 | 0 |
| 10   | 12  | 600 2   | 2 | 2 2     | 4 9     | 20,9 | 0 | 1 |
| 5,5  | 9   | 99 2    |   |         | 2       | 67,3 | 1 | 0 |
| 3,2  | 3,2 | 15,36 9 | 9 | 0,31 9  | 0,53 3  |      | 1 | 0 |
| 10   | 5   | 125 2   | 2 | 2       | 2       | 160  | 0 | 1 |
| 2    | 5,5 | 20      | 9 | Page 28 | 2       | 61,2 | 0 | 0 |

|      |      |          |   |         |        |       |   |   |
|------|------|----------|---|---------|--------|-------|---|---|
| 6,2  | 7,3  | 92,8 2   | 2 | 1,48 2  | 2,65 2 | 63    | 0 | 0 |
| 5,2  | 5,5  | 82,9 2   | 2 | 1,72 2  | 2,32 2 | 32,6  | 1 | 0 |
| 8,5  | 8,3  | 246,9 2  | 2 | 2       | 2      |       | 1 | 0 |
| 6    | 8,4  | 226,8 2  | 3 | 3       | 2      | 38,9  | 0 | 1 |
| 7,5  | 9    | 219 2    | 2 | 2       | 2      | 152,5 | 1 | 0 |
| 13   | 7    | 2        | 2 | 9       | 2      | 617   | 0 | 1 |
| 6    | 7    | 210 2    | 9 | 9       | 9      |       | 0 | 0 |
| 4    | 4    | 44 2     | 2 | 2       | 2      | 30    | 0 | 0 |
| 10   | 13,5 | 573,75 3 | 2 | 2       | 2      | 34    | 0 | 0 |
| 4    | 3,7  | 29,6 2   | 2 | 2       | 2      | 29    | 1 | 0 |
|      |      |          | 0 | 0       |        |       | 1 | 0 |
| 4    | 5,5  | 55       | 9 | 0,25 9  | 0,25 2 | 28    | 0 | 0 |
| 2    | 4    |          | 9 | 0,5 9   | 0,73 2 | 51,1  | 0 | 0 |
| 4,5  | 5,5  | 49,5 2   | 2 | 1,77 2  | 3,4 2  | 97    | 0 | 1 |
| 3,1  | 4,4  | 32 3     | 9 | 0,71 9  | 0,85 9 | 24    | 1 | 0 |
| 7,2  | 8,3  | 269 3    | 9 | 9       | 9      |       | 0 | 1 |
| 6,3  | 4,6  | 66,7 2   | 2 | 2       | 2      | 28,3  | 0 | 0 |
| 4    | 3    |          |   |         |        |       | 0 | 0 |
| 6    | 8    | 144 2    | 2 | 2       | 2      | 107   | 0 | 0 |
| 4,5  | 7    | 55 2     | 9 | 9       | 9      | 8     | 1 | 0 |
| 4    | 6    | 60 2     | 2 | 2,38 2  | 3,17 3 |       | 1 | 0 |
| 3    | 3,5  | 13,1     | 9 | 9       | 2      | 26,6  | 1 | 0 |
| 4    | 5    | 50 2     | 2 | 2,13 2  | 1,53 3 |       | 1 | 0 |
| 7    | 6,5  | 159,25 2 | 2 | 2       | 2      | 54,1  | 1 | 0 |
| 1,9  | 3    | 7,1 9    | 9 | 9       | 2      | 50    | 1 | 0 |
| 4,2  | 2,8  | 20,6 2   | 9 | 0,95 2  | 2,49 2 | 70,2  | 1 | 0 |
| 4,8  | 6,6  | 71,28 2  | 2 | 2       | 2      | 56    | 1 | 0 |
|      |      | 800 2    | 2 | 2       | 3      |       | 0 | 1 |
| 3,8  | 4,5  | 51,3 2   | 2 | 2       | 2      | 36,7  | 0 | 1 |
| 4,4  | 5,6  | 44,35 2  | 2 | 9       | 2      | 24,1  | 1 | 0 |
| 7    | 9,6  | 154,6 2  | 2 | 13,84 2 | 5,42 2 | 63,4  | 0 | 0 |
| 3,5  | 4,5  | 19,7 2   | 9 | 9       | 2      | 22    | 0 | 0 |
| 3,8  | 4    | 36,5 2   | 9 | 9       | 2      | 41    | 1 | 0 |
| 4,7  | 5,9  | 74,87 3  | 3 | 3       | 1      | 26,1  | 1 | 0 |
| 2,8  | 3,2  | 15,2 2   | 9 | 2       | 2      | 47,6  | 1 | 0 |
|      |      |          | 3 | 3       |        |       | 0 | 1 |
| 5    | 3    | 22,5     | 9 | 9       | 3      |       | 0 | 0 |
| 9    | 13   | 526,5 3  | 2 | 9       | 2      | 512   | 0 | 1 |
| 10   | 10   | 400 9    | 9 | 9       | 9      |       | 0 | 0 |
| 6,1  | 7,3  | 129,1 3  |   |         | 2      | 35,5  | 1 | 0 |
| 5    | 5    | 43,75 2  | 2 | 4,75 2  | 2,99 9 | 16,3  | 0 | 0 |
| 6    | 5    | 75 3     | 9 | 0,51 9  | 0,69 9 | 11,4  | 1 | 0 |
| 1,46 | 2,8  | 4,95     | 9 |         | 9      | 11,4  | 0 | 0 |

|      |      |         |   |        |        |       |   |   |
|------|------|---------|---|--------|--------|-------|---|---|
| 2,2  | 2    | 5,5 2   | 2 | 2      | 2      | 107,6 | 0 | 1 |
| 2,1  | 2,5  | 3,15 9  | 9 | 9      | 2      | 30,9  | 1 | 0 |
|      |      | 3       | 9 | 0,41 9 | 0,82   |       | 0 | 0 |
| 5    | 7    | 87,5 2  | 2 | 2      | 3      |       | 1 | 0 |
| 11   | 13   | 780 3   | 9 | 0,4 9  | 0,48 2 | 143   | 0 | 1 |
| 3,31 | 3,64 | 17,1    | 9 | 9      | 9      | 16,9  | 1 | 0 |
| 13   | 16   | 364 2   | 2 | 2      | 3      |       | 0 | 0 |
| 6,3  | 6,4  | 121 2   | 9 | 9      | 2      | 138,1 | 0 | 0 |
| 4    | 6    | 36      | 9 | 9      | 9      | 13,8  | 0 | 1 |
| 3,9  | 6    | 70,2 2  | 2 | 2      | 2      | 125   | 1 | 0 |
| 6    | 7    | 126 2   | 2 | 2,4 9  | 0,78 2 | 182,1 | 0 | 1 |
| 7,1  | 7,6  | 134,9 2 | 0 | 0      | 2      | 33,6  | 0 | 1 |
| 6    | 6    | 90 2    | 2 | 2      | 2      | 54,8  | 0 | 1 |
|      |      | 600 2   | 9 | 9      |        |       | 0 | 1 |
| 2    | 2,5  | 3       | 9 | 9      | 9      | 7,3   | 1 | 0 |
|      |      | 2       | 9 | 9      | 1      | 20,2  | 0 | 0 |
| 2,5  | 1,8  | 5,4 2   | 1 | 0,96 2 | 1,16 2 | 41,3  | 0 | 1 |
| 1,2  | 3    | 1,8     | 9 | 0,37 9 | 0,79 2 | 68    | 0 | 0 |
| 4    | 4    | 24      | 3 | 3      | 3      |       | 1 | 0 |
|      |      | 9       | 9 | 9      | 2      | 37,66 | 0 | 0 |
| 4,5  | 3,6  | 41,31 2 | 2 | 2,73 2 | 2,23 3 |       | 0 | 0 |
| 3,5  | 3    |         | 2 | 2      |        |       | 0 | 0 |
| 5    | 6    | 50 2    | 9 | 0,69 9 | 0,47 1 | 14,5  | 1 | 0 |
| 5,6  | 8,7  | 131,5 2 | 2 | 3,25 2 | 4,63 2 | 106,5 | 1 | 0 |
| 13,5 | 12   | 1263 2  | 2 | 9      | 2      | 183   | 0 | 1 |
| 8    | 13   | 416 2   | 9 | 0,26 9 | 0,37 2 | 273   | 0 | 1 |
|      |      | 3       | 2 | 2      | 2      | 246,7 | 0 | 0 |
| 3,3  | 2,4  | 2       | 0 | 0      | 0      | 26,6  | 1 | 0 |
| 2    | 2    | 5 2     | 9 | 0,3 9  | 0,29 9 | 12,3  | 1 | 0 |
| 7    | 7    | 122,5 2 | 2 | 2,08 2 | 5,85 2 | 47,5  | 0 | 1 |
|      |      | 2       | 2 | 2      | 2      | 24,21 | 0 | 0 |
| 6,7  | 6,8  | 164 2   | 9 | 0,64 9 | 0,54 2 | 41,7  | 0 | 0 |
| 3,5  | 2,5  | 12 3    | 9 | 9      | 3      |       | 0 | 0 |
| 3,8  | 3,5  | 15,3 2  | 9 | 2      | 2      | 27,6  | 1 | 0 |
| 1,8  | 2,2  | 5,35    | 9 | 9      |        |       | 1 | 0 |
| 5,8  | 6,1  | 76 9    | 9 | 9      |        |       | 0 | 0 |
| 6,6  | 10   | 260,7 2 | 2 | 2      | 2      | 86,57 | 1 | 0 |
| 5,3  | 3,8  | 38 2    | 2 | 1,25 2 | 1,98 9 | 18,4  | 1 | 0 |
| 4    | 64,8 | 42 2    | 2 | 3,86 2 | 1,65 2 | 24,1  | 1 | 0 |
| 6    | 5    | 105 0   | 9 | 9      | 2      | 35,6  | 0 | 1 |
| 3,7  | 4,4  | 22 2    | 2 | 2,4 2  | 7 3    |       | 1 | 0 |
| 2,2  | 2,8  | 4,93 3  | 9 | 9      | 3      |       | 1 | 0 |
|      |      | 2       | 2 | 1,0 9  | 0,42 2 | 109   | 0 | 0 |

|      |      |         |   |        |         |       |   |   |
|------|------|---------|---|--------|---------|-------|---|---|
| 2,4  | 2,6  | 5,62 2  | 9 | 9      | 2       | 19,7  | 1 | 0 |
| 4,9  | 4,2  | 60,7 0  | 9 | 2      | 1,09 2  | 24,1  | 1 | 0 |
| 5,6  | 6    | 75,6 2  | 2 | 9      | 2       | 83    | 1 | 0 |
| 3,5  | 5    | 52,5 9  | 9 | 9      | 2       | 115   | 0 | 0 |
|      |      | 2       | 9 | 9      |         |       | 1 | 0 |
|      |      | 2       | 9 | 9      | 0       |       | 0 | 1 |
| 5    | 6    | 75 2    | 2 | 2      | 2       | 41,2  | 1 | 0 |
| 3    | 3    | 7 2     | 9 | 0,78 2 | 1,04 2  | 28    | 1 | 0 |
| 4    | 5    | 35 2    | 2 | 2      | 9       | 16    | 1 | 0 |
| 7,7  | 10,2 | 365,2 2 | 2 | 1,8 2  | 1,98 2  | 11,7  | 1 | 0 |
| 2    | 2    | 4 2     | 9 | 9      | 9       | 16    | 1 | 0 |
| 3,6  | 3,7  | 30,6 2  | 2 | 2      | 0       |       | 1 | 0 |
|      |      | 2       | 1 | 0,98 2 | 1,29 1  |       | 0 | 0 |
|      |      |         | 2 | 2,5 2  | 3 2     | 72,6  | 1 | 0 |
| 9    | 7    | 220,5 2 | 2 | 4,52 2 | 5,25 3  |       | 0 | 1 |
| 3,5  | 4    | 17,5 2  | 0 | 0      | 2       | 34,5  | 0 | 0 |
| 5,4  | 5,5  | 44,6 9  | 9 | 2      | 3       |       | 0 | 0 |
| 8    | 7    | 140 3   | 9 | 2      | 2       | 70    | 1 | 0 |
| 5    | 6    | 75 2    | 2 | 2      | 9       | 18,1  | 0 | 0 |
| 1,4  | 3,1  | 4,5 2   | 9 | 9      | 2       | 36    | 1 | 0 |
|      |      | 2       | 2 | 2      | 9       |       | 0 | 0 |
| 2,8  | 3    | 16,8 2  | 9 | 0,71 9 | 0,64 3  |       | 1 | 0 |
| 10,5 | 10,2 | 530 0   | 2 | 3,07 2 | 3,6 2   | 38    | 0 | 1 |
|      |      | 9       | 9 | 9      | 9       | 8,3   | 1 | 0 |
| 3,6  | 3,8  | 40,3 2  | 2 | 2      | 2       | 22,6  | 1 | 0 |
| 3,3  | 4,3  | 44 2    | 2 | 4,2 2  | 1,67 2  | 55    | 1 | 0 |
|      |      | 2       | 9 | 9      | 2       | 319,5 | 0 | 1 |
| 8    | 13   | 364 2   | 2 | 12 2   | 28 3    |       | 0 | 1 |
|      |      | 3       | 9 | 0,82 9 | 0,81 2  | 33,4  | 0 | 0 |
| 1,5  | 1,6  | 2,2     | 9 | 9      | 2       | 21    | 1 | 0 |
| 5    | 4    | 30 3    | 9 | 9      | 2       | 18,8  | 1 | 0 |
| 5,3  | 8,2  | 130,4 9 | 9 | 0,96 9 | 0,28 2  | 657   | 0 | 1 |
| 5,6  | 5,6  | 2       |   | 2      |         |       | 1 | 0 |
|      |      |         | 9 | 9      | 2       |       | 1 | 0 |
| 6,5  | 7    | 109,2 2 | 2 | 9      | 9       | 12,44 | 0 | 1 |
| 9,5  | 10,5 | 399 2   | 2 | 1,63 2 | 2,73 3  |       | 0 | 0 |
| 4,9  | 7,3  | 145 3   | 2 | 6,31 2 | 17,53 2 | 277   | 1 | 0 |
| 8    | 9    | 252 2   | 2 | 2      | 2       | 121,7 | 0 | 0 |
| 6,1  | 3,4  | 55 2    | 2 | 2      |         |       | 0 | 0 |
| 1,5  | 2,4  | 6 3     |   |        | 2       | 37    | 1 | 0 |
| 1,8  | 2,5  | 3,8     | 2 | 9      | 2       | 83    | 1 | 0 |
| 6,8  | 6,5  | 137 2   | 2 | 2      | 9       | 18    | 1 | 0 |
| 6,6  | 10   | 132 2   | 2 |        | 5 2     | 34,3  | 1 | 0 |

|      |     |         |    |        |        |       |   |   |
|------|-----|---------|----|--------|--------|-------|---|---|
|      |     | 2       | 9  | 0,65 9 | 0,9 2  | 16,2  | 1 | 0 |
| 4    | 4   | 28 2    | 2  | 2,16 2 | 1,85 2 | 45,8  | 1 | 0 |
| 3    | 4,5 | 16,9 2  | 9  | 0,69 9 | 0,51 9 | 12    | 0 | 0 |
| 7,5  | 9   | 337,5 2 | 2  | 1,65 9 | 2      | 36,1  | 1 | 0 |
| 5,2  | 5,7 | 149 2   | 2  | 2      | 2      | 96    | 0 | 0 |
| 5,5  | 6,5 | 62 2    | 2  | 2 2    | 4 2    | 86,7  | 1 | 0 |
| 5,8  | 5,7 | 99 2    | 2  | 2      | 3      |       | 1 | 0 |
|      |     | 7,8 2   | 2  | 2      | 3      |       | 0 | 1 |
| 1,5  | 1,5 | 1,7 9   | 9  | 9      | 2      | 37,9  | 0 | 0 |
| 4    | 4,5 | 27      | 9  | 9      | 9      | 11    | 0 | 1 |
| 10,5 | 10  | 446,2 2 | 9  | 9      | 2      | 370   | 0 | 0 |
| 6,5  | 8   | 169 2   | 2  | 1,85 2 | 4,4 2  | 112   | 1 | 0 |
| 3,7  | 4   | 0       | 2  | 1,43 2 | 3,37 2 | 22,5  | 0 | 1 |
| 5    | 7   | 70 2    | 3  | 2      | 2      | 27    | 0 | 0 |
| 2,3  | 2,1 | 4,8 9   | 9  | 0,58 9 | 0,72 9 | 12,3  | 1 | 0 |
| 4    | 3   | 2       | 2  | 1,5 2  | 2 2    | 112,4 | 0 | 1 |
| 4    | 3,7 | 42,2 2  | 2  | 2      | 2      | 43,2  | 1 | 0 |
| 4    | 4,5 | 31,5 2  | 9  | 9      | 2      | 26,4  | 1 | 0 |
| 2,5  | 3,5 | 7,8 2   | 9  | 9      | 2      | 45,3  | 0 | 0 |
| 5    | 5   | 50 2    | 2  | 3,27 2 | 3,22 3 |       | 0 | 0 |
|      |     | 25 0    | 9  | 9      | 3      |       | 1 | 0 |
| 4,1  | 6,7 | 75 3    | 0  | 0      | 2      | 60,6  | 0 | 0 |
| 4    | 9,4 | 112,8 2 | 2  | 2      | 2      | 46,5  | 0 | 0 |
| 5,5  | 6,5 | 151,9 2 | 2  | 2      | 2      | 539,1 | 0 | 1 |
| 7    | 6   | 210 2   | 2  | 1,25 2 | 3,7 2  | 61,8  | 0 | 0 |
| 7    | 8   | 280 2   | 9  | 9      | 2      | 421,5 | 0 | 1 |
| 4    | 4   | 30,4 2  | 2  | 2      | 2      | 14,7  | 1 | 0 |
| 1,8  | 4,5 | 8,1 2   | 2  | 2      | 0      | 15    | 0 | 1 |
| 3,4  | 5,5 | 37,4 3  | -1 | 0      | 3      |       | 1 | 0 |
|      | 5   | 3       | 9  | 0,25 9 | 0,54 9 | 11,5  | 1 | 0 |
| 1,2  | 2,3 | 1,24 9  | 9  | 9      | 2      | 29,1  | 0 | 0 |
| 1    | 5   | 2       | 9  | 0,43 9 | 0,33 9 | 14,8  | 0 | 0 |
| 3,5  | 3,4 | 18,3 3  | 0  | 0      | 2      | 16,4  | 0 | 0 |
| 7,2  | 6,1 | 202 2   | 2  | 2      | 2      | 370   | 0 | 0 |
| 3,4  | 3,7 | 18 2    | 9  | 9      | 2      | 22,5  | 1 | 0 |
| 4    | 3   | 15 3    | 9  | 0,55 9 | 0,5 9  | 17,4  | 1 | 0 |
| 5    | 4   | 35 2    | 9  | 9      | 2      | 59,2  | 1 | 0 |
| 8    | 10  | 300 3   | 2  | 9      | 2      | 22,9  | 0 | 1 |
| 8,9  | 6,2 | 137,9 2 | 9  | 9      | 2      | 66,2  | 0 | 0 |
| 3,5  | 3,5 | 21 2    | 9  | 9      | 9      | 18,9  | 1 | 0 |
| 5,2  | 6,4 | 73,2 2  | 2  | 15 2   | 20 2   | 66    | 1 | 0 |
| 5,5  | 6,2 | 86,9 2  | 3  | 2      | 2      | 63,9  | 1 | 0 |
| 3    | 6   | 126 2   | 2  | 6,7 2  | 8,07 2 | 148   | 0 | 0 |

|      |      |         |   |         |         |       |   |   |
|------|------|---------|---|---------|---------|-------|---|---|
| 5    | 6,6  | 112 2   | 2 | 2       | 2       | 37    | 1 | 0 |
|      |      | 400 2   | 2 | 2,49 2  | 2,38 3  |       | 0 | 0 |
| 5,5  | 5    | 75,6 2  | 2 | 2       | 2       | 41,7  | 1 | 0 |
| 3,4  | 5,3  | 30,6 2  | 2 | 3,5 2   | 3,4 2   | 83    | 1 | 0 |
| 5    | 4,6  | 69 0    | 2 | 2       | 2       | 38,5  | 1 | 0 |
| 5    | 5,6  | 70 2    | 2 | 2,6 2   | 7 2     | 25,1  | 0 | 0 |
| 4    | 4    | 12      |   |         |         |       | 0 | 0 |
| 7,6  | 9,4  | 500 2   | 2 | 2       | 2       | 859,8 | 0 | 1 |
| 4,6  | 6,5  | 158,5 2 | 2 | 3 2     | 4,8 2   | 36,5  | 1 | 0 |
| 5    | 6,5  | 65 3    | 9 | 9       | 9       | 12,9  | 1 | 0 |
| 4,3  | 4,5  | 29 2    | 2 | 2       | 9       | 24,1  | 1 | 0 |
| 3    | 4    | 12 0    | 2 | 2       | 2       | 45,5  | 0 | 0 |
| 2,2  | 2,73 |         | 9 | 9       | 2       | 30,2  | 1 | 0 |
| 1,6  | 3,2  | 2 2     | 9 | 9       | 2       | 39,8  | 1 | 0 |
|      |      | 2       | 2 | 1,1 2   | 3 9     |       | 1 | 0 |
| 11   | 8,5  | 2       | 2 | 2       | 2       | 97,33 | 0 | 1 |
| 4,5  | 5    | 45 3    | 2 | 2       | 3       |       | 1 | 0 |
| 4    | 6    | 36 2    | 2 | 1,38 2  | 4,56 2  | 26    | 0 | 1 |
| 6    | 7    | 136,5 3 | 2 | 9       | 2       | 45    | 1 | 0 |
| 4,5  | 4    | 54 2    | 9 | 2       | 2       | 32,3  | 1 | 0 |
| 1,8  | 2    | 3,6 2   | 9 | 0,63 9  | 0,64 2  | 47    | 1 | 0 |
| 5    | 6    | 60 2    | 2 | 3,4 2   | 5,5 2   | 38,6  | 1 | 0 |
| 2    | 3    | 6 2     | 9 | 0,82 9  | 0,97 2  | 31,2  | 1 | 0 |
| 3,9  | 7,4  | 102 2   | 2 |         |         |       |   |   |
| 3,4  | 7,2  | 56,3 9  | 9 | 9       | 9       | 13,9  | 0 | 0 |
| 14,2 | 12   | 631 9   | 2 | 10,77 2 | 20,74 2 | 200   | 0 | 1 |
| 8    | 9    | 270 9   | 9 | 9       | 2       | 50    | 0 | 0 |
| 3,7  | 4,9  | 32,6 9  | 9 | 9       | 2       | 140   | 1 | 0 |
| 8    | 9    | 288 2   | 2 | 1       | 2       | 49,3  | 0 | 0 |
| 3    | 3,2  | 14 2    | 9 | 2       | 9       | 7     | 1 | 0 |
| 7    | 5    | 122,5 3 | 2 | 3 2     | 8 2     | 34,8  | 1 | 0 |
| 5,3  | 4,5  | 103,7 2 | 2 | 1,04 2  | 3,2 2   | 67,1  | 0 | 0 |
| 1,8  | 2,1  | 8,5 3   | 2 | 2       | 0       |       | 0 | 0 |
|      |      | 8,2 3   | 2 | 2       | 2       | 67,4  | 0 | 0 |
| 4    | 4    | 3       | 2 | 2       | 2       | 107,8 | 1 | 0 |
|      |      | 2       | 2 | 4 2     | 5 2     | 37,1  | 0 | 0 |
| 9    | 9    | 202,5 3 | 2 | 2       | 2       | 48,7  | 0 | 0 |
| 3,2  | 4,3  | 37,8 3  | 0 | 0       | 0       |       | 1 | 0 |
| 8    | 9    | 324 2   | 2 | 2       | 2       | 77    | 1 | 0 |
| 2    | 2    | 4 2     | 9 | 2       | 3       |       | 1 | 0 |
| 7    | 7    | 196 2   | 9 | 9       | 2       | 26,4  | 1 | 0 |
| 3,2  | 5,1  | 46,5 2  | 9 | 9       | 2       | 35,6  | 1 | 0 |
| 4,9  | 4,1  | 40,2 2  | 2 | 1,96 2  | 1,96 2  | 46,2  | 0 | 0 |

|     |     |         |   |        |         |       |     |
|-----|-----|---------|---|--------|---------|-------|-----|
| 4,7 | 6   | 117 2   | 9 | 9      | 3       | 0     | 1   |
| 3,4 | 3,7 | 18,9 2  | 2 | 2      | 9       | 19,2  | 1 0 |
| 4,2 | 4,5 | 46,3 3  | 9 | 9      |         |       | 1 0 |
| 6   | 8   | 100 3   | 2 | 10 2   | 8 3     |       | 0 0 |
|     |     | 2       | 9 | 2      | 2       | 53,2  | 0 0 |
| 1,3 | 1,5 | 2,2 2   | 3 | 9      | 9       | 19,1  | 1 0 |
|     |     | 2300 2  | 3 | 3      | 3       |       | 0 0 |
| 6,5 | 7,6 | 155,6 2 | 2 | 2      | 9       | 22    | 1 0 |
| 4,5 | 4,2 | 51,9 2  | 2 | 2      | 2       | 51,9  | 1 0 |
| 5,8 | 7,6 | 176 2   | 2 | 2      | 2       | 68,3  | 0 0 |
|     |     | 3       | 9 | 2      | 2       | 45,2  | 1 0 |
| 8,5 | 9   | 267,8 9 | 9 | 9      | 2       | 17,1  | 1 0 |
| 2,5 | 4   | 12,5 9  | 9 | 0,58 9 | 0,56 9  | 13,1  | 1 0 |
| 4   | 3,7 | 28,1 2  | 2 | 1,6 2  | 1,6 2   | 38,5  | 1 0 |
| 7   | 5   | 105 2   | 2 | 4,7 2  | 23,6 2  | 65,6  | 1 0 |
| 3,3 | 7,7 | 60,4 9  | 9 | 9      | 2       | 22    | 1 0 |
| 3,3 | 3,2 | 16,9 2  | 9 | 9      | 9       | 20    | 1 0 |
|     | 10  | 9       | 9 | 9      | 9       |       | 0 0 |
| 2,1 | 2,2 | 3,9 2   |   |        | 9       | 16,7  | 1 0 |
| 2,5 | 2,5 | 10,6 3  | 9 | 9      | 2       | 30    | 0 1 |
| 2,9 | 3,4 | 11 3    | 3 | 3      | 3       |       | 1 0 |
| 7,5 | 5,8 | 93,5 3  | 2 | 2      | 2       | 47,3  | 0 1 |
| 4,5 | 7,3 | 83 2    | 2 | 4,93 2 | 3,46 2  | 55,1  | 0 0 |
| 2,7 | 4,2 | 13 2    | 9 | 9      | 9       | 16,8  | 1 0 |
| 5,3 | 5,4 | 50 2    | 0 | 0      | 1       | 20,7  | 1 0 |
|     |     | 0       | 2 | 2      | 2       | 45,3  | 0 0 |
| 6,6 | 6,6 | 106,7 2 | 2 | 1,29 2 | 3,34 2  | 36,2  | 1 0 |
| 6   | 6,5 | 76 2    | 9 | 0,47 9 | 0,7 9   | 7,9   | 0 0 |
| 5,6 | 7,3 | 102,2 2 | 2 | 2      | 2       | 53,5  | 1 0 |
| 4,5 | 7   | 3       | 2 | 2      | 2       | 175,2 | 0 1 |
| 2,2 | 5   | 47 2    | 9 | 9      | 9       | 12,9  | 0 0 |
| 2,1 | 2,7 | 5,9 3   | 3 | 9      | 9       | 15    | 1 0 |
| 3   | 3   | 13,5 2  | 9 | 9      | 2       | 38,9  | 1 0 |
| 6   | 6   | 158,4 2 | 2 | 2      | 2       | 123,9 | 0 0 |
|     |     | 2       | 2 | 1,31 2 | 1,65 2  | 55    | 1 0 |
|     |     |         |   |        |         |       | 1 0 |
| 3,7 | 4,8 | 35,5 2  | 2 | 2      | 2       | 11,6  | 0 0 |
|     |     | 2       | 9 | 0,74 2 | 1,88 2  | 64,6  | 1 0 |
| 6,5 | 6,2 | 112,8 3 | 2 | 9      | 2       | 41,8  | 0 0 |
| 5,7 | 5,1 | 104,6 2 | 2 | 2,56 2 | 3,88 2  | 31,4  | 0 1 |
| 4,5 | 3,5 | 47,2 2  | 2 | 2      | 2       | 22,1  | 1 0 |
| 6,3 | 8,7 | 180,9 2 | 2 | 7,72 2 | 13,49 2 | 65,4  | 1 0 |
| 6   | 6,5 | 136,5 2 | 2 |        | 2       | 37,3  | 1 0 |

|     |     |         |   |        |        |       |   |   |
|-----|-----|---------|---|--------|--------|-------|---|---|
| 4,2 | 5,6 | 64,7 2  | 2 | 2      | 2      | 109   | 0 | 0 |
|     |     | 30 2    | 2 | 1,15 2 | 2,6 3  |       | 0 | 1 |
| 4,8 | 4,5 | 47,5 2  | 9 | 9      | 9      | 11    | 0 | 1 |
| 3,5 | 4,6 | 12,9 2  | 9 | 3      | 2      | 32,4  | 1 | 0 |
|     |     | 2       | 2 | 2      | 2      | 21,8  | 0 | 1 |
| 5,1 | 4,6 | 58,7 2  | 2 | 3,01 2 | 4,22 9 | 23,6  | 1 | 0 |
| 1,5 | 2   | 3,75 2  | 9 | 9      | 3      |       | 1 | 0 |
|     |     | 4,9 2   | 9 | 0,79 2 | 1,46 9 | 16,2  | 1 | 0 |
| 5   | 7   | 136,5 2 | 3 | 2      | 2      | 35    | 1 | 0 |
| 3,5 | 2,6 | 19 2    | 2 | 1,85 2 | 2,93 2 | 39,4  | 1 | 0 |
| 3,1 | 3,3 | 9,7 2   | 9 | 9      | 9      | 11    | 1 | 0 |
| 3,1 | 5   | 21 9    | 9 | 9      | 2      | 50,6  | 1 | 0 |
| 4   | 6,6 | 46,2 9  | 2 | 2,87 2 | 2,68 2 | 50    | 1 | 0 |
| 2,4 | 3,6 | 12 2    | 2 | 2      | 2      | 72,3  | 1 | 0 |
|     |     | 2       | 2 | 1,62 2 | 2,42 2 | 27,61 | 1 | 0 |
| 0,6 | 1,2 | 0,6 2   | 9 | 9      | 2      | 42    | 0 | 0 |
| 3,8 | 2,7 | 20,5 2  | 9 | 0,67 2 | 1,19 9 | 9,3   | 0 | 1 |
| 2,4 | 3,4 | 10,2 2  | 9 | 0,67 9 | 0,6 9  | 14,8  | 1 | 0 |
| 2,7 | 3,5 | 12,3 2  | 2 | 2      | 3      |       | 1 | 0 |
|     |     | 3,5 3   | 3 | 3      | 3      |       | 0 | 0 |
|     |     | 2       | 9 | 0,92 2 | 1,37 2 | 54,3  | 0 | 0 |
| 6   | 6   | 108     | 2 | 2      | 2      | 81    | 0 | 0 |
| 6   | 6,6 | 127 2   | 2 | 2,31 2 | 5,52 2 | 71,2  | 1 | 0 |
| 1,9 | 2,8 | 7,7 2   | 2 | 2      | 9      | 12,38 | 0 | 0 |
| 6   | 7,3 | 115,5 2 | 2 | 4 2    | 3,15 2 | 32    | 0 | 0 |
| 3,4 | 5   | 57,8 2  | 2 | 2      | 2      | 27,6  | 0 | 1 |
| 3   | 3   | 6,8 3   | 3 | 3      | 3      |       | 1 | 0 |
| 6,5 | 10  | 325 2   | 2 | 3,26 2 | 10,4 2 | 458,5 | 0 | 1 |
| 7,8 | 9,5 | 389 2   | 2 | 2      | 2      | 377,5 | 0 | 1 |
| 3,3 | 3,4 | 15,7 2  | 9 | 0,67 9 | 0,97 1 | 20,3  | 1 | 0 |
| 2,3 | 4   | 6 3     | 2 | 2      | 2      | 87,4  | 0 | 1 |
| 2   | 2,5 | 2       | 9 | 9      | 9      | 11,9  | 0 | 0 |
| 6,6 | 5,6 | 83 2    | 2 | 2      | 2      | 62,7  | 1 | 0 |
| 5,5 | 7,2 | 128,7 2 | 2 | 2      | 0      |       | 0 | 0 |
|     |     | 3       | 9 | 0,38 9 | 0,83 2 | 47,1  | 1 | 0 |
| 4   | 8   | 64 2    | 2 | 2      | 2      | 43,1  | 1 | 0 |
|     |     | 40 2    | 2 | 1,28 2 | 3,2 2  | 66,4  | 1 | 0 |
| 2,2 | 2,2 | 7,2 2   | 2 | 1,07 2 | 2,34 2 | 24,9  | 0 | 1 |
| 2,8 | 3   | 9,2 3   | 3 | 9      | 9      | 27,9  | 1 | 0 |
| 3   | 4,8 | 45 0    | 2 | 2      | 2      | 26,3  | 1 | 0 |
| 4,3 | 6,3 | 90,7 2  | 2 | 2      | 2      | 112,3 | 0 | 1 |
| 3,4 | 4,3 | 29,2 2  | 9 | 0,75 2 | 1,35 9 | 20,7  | 1 | 0 |
| 10  | 11  | 500 2   | 2 |        | 2      | 318   | 0 | 1 |

|      |      |         |   |        |        |       |   |   |
|------|------|---------|---|--------|--------|-------|---|---|
| 10,5 | 8,8  | 600 2   | 2 | 1,08 9 | 0,43 0 |       | 0 | 1 |
| 6    | 12   | 360 2   | 9 | 9      | 2      | 407   | 0 | 0 |
| 8,3  | 8,5  | 197,5 3 | 2 | 2      | 9      | 13    | 1 | 0 |
| 6    | 7    | 105 2   | 2 | 3,88 2 | 4,88 2 | 82    | 1 | 0 |
|      |      | 81,5 3  | 2 | 1,32 2 | 4,57 3 |       | 0 | 1 |
| 10,3 | 11,2 | 605,6 2 | 2 | 6,29 2 | 5,7 3  |       | 0 | 0 |
| 2,5  | 2,7  | 14,1 3  | 9 | 2      | 9      |       | 1 | 0 |
| 2    | 2,5  | 5 3     | 9 | 9      | 2      | 24,3  | 1 | 0 |
|      |      | 2       | 2 | 1,35 2 | 1,89 2 | 22,7  | 1 | 0 |
| 2,7  | 4,7  | 25,4 2  | 9 | 2      | 3      |       | 1 | 0 |
| 5    | 6,4  | 76 2    | 9 | 9      | 9      | 18    | 1 | 0 |
|      |      |         |   |        |        |       | 1 | 0 |
| 4    | 5    | 60 0    | 9 | 3      | 2      | 73,5  | 1 | 0 |
| 3    | 6,4  | 14,4 3  | 9 | 9      | 2      | 30,3  | 1 | 0 |
|      |      | 62 2    | 2 | 1,8 2  | 3,64 2 | 26,6  | 1 | 0 |
| 7,2  | 9    | 149 2   | 2 | 6,2 2  | 4,9 2  | 30,2  | 1 | 0 |
| 2,8  | 3    | 10,4 2  | 9 | 0,47 9 | 0,54 2 | 35,3  | 1 | 0 |
| 9,8  | 13,8 | 466,8 2 | 2 | 1,25 2 | 1,02 2 | 332,4 | 0 | 0 |
| 4    | 5,6  | 56 2    | 2 | 1,75 2 | 2,94 2 | 46,8  | 0 | 1 |
| 4    | 8    | 2       | 1 | 2      | 2      | 182,3 | 0 | 0 |
| 1,6  | 4    | 4,5 9   | 9 | 9      | 2      | 23,5  | 0 | 0 |
| 1,7  | 2,6  | 5,5 3   | 9 | 9      | 9      |       | 1 | 0 |
| 5,1  | 8    | 91,8 2  | 2 | 2      | 1,48 2 | 72,5  | 0 | 0 |
| 3,5  | 4    | 21 2    | 2 | 2      | 2      | 119   | 1 | 0 |
| 11   | 12,2 | 536 2   | 2 | 1,99 2 | 3,32 2 | 408,5 | 0 | 1 |
| 4    | 4    | 32 2    | 2 | 2      | 9      | 19,1  | 1 | 0 |
| 10   | 9    | 675 2   | 2 | 2      | 2      | 761   | 0 | 0 |
|      |      | 2       | 2 | 1,09 2 | 3,1 0  |       | 1 | 0 |
| 4    | 6    | 90 3    |   | 2      |        |       | 0 | 1 |
| 8    | 12   | 360 9   | 9 | 9      |        |       | 0 | 1 |
| 3,2  | 4,4  | 2       | 2 | 1,93 2 | 1,32 9 | 20,9  | 0 | 0 |
| 6    | 5    | 2       | 2 | 2      | 2      | 105   | 0 | 0 |
| 1,7  | 2,3  | 5,6 2   | 2 | 2      | 2      | 23,4  | 1 | 0 |
| 11   | 13   | 500 2   | 2 | 9      | 2      | 408   | 0 | 1 |
| 4,5  | 8,5  | 76,5 3  | 2 | 2      | 3      |       | 0 | 1 |
| 13   | 14,7 | 1080 3  | 2 | 2      | 2      | 129,5 | 0 | 0 |
| 9    | 9    | 526,5 2 | 2 | 9      | 2      | 340,1 | 0 | 1 |
| 7    | 8    | 179,2 2 | 9 | 9      | 2      | 140,3 | 0 | 0 |
| 9    | 12   | 324 2   | 2 | 1,27 9 | 0,58 2 | 456,5 | 0 | 0 |
| 3,1  | 4,4  | 15      | 9 | 9      | 2      | 24,7  | 0 | 0 |
| 4,2  | 3,4  | 3       | 2 | 2      | 2      | 26,5  | 1 | 0 |
| 3    | 5    | 30 2    | 3 | 3      | 9      | 21,4  | 1 | 0 |
| 4,8  | 4,5  | 47,5 2  | 2 | 1,08 9 | 3,15 2 | 84,5  | 1 | 0 |

|      |     |         |    |         |        |       |   |   |
|------|-----|---------|----|---------|--------|-------|---|---|
| 7    | 8   | 140 9   | 9  | 0,57 9  | 0,51 2 |       | 1 | 0 |
| 6    | 7   | 126 2   | 2  | 5,6 2   | 8,9 3  |       | 0 | 0 |
| 10   | 10  | 550 2   | 2  | 2,99 2  | 1,97 2 | 687   | 0 | 0 |
| 3    | 6,5 | 20 2    | 2  | 2       | 2      | 88,7  | 1 | 0 |
| 2,7  | 4,3 | 40 2    | 2  | 2       | 2      | 32,95 | 0 | 0 |
| 3,8  | 5,4 | 27,7 2  | 2  | 2,32 2  | 8,1 2  | 48,4  | 1 | 0 |
| 1,7  | 1,8 | 1       | 9  | 0,42 9  | 0,47 2 | 22,2  | 1 | 0 |
| 5,8  | 5,1 | 115,4 9 | 2  | 2       | 2      | 133,7 | 1 | 0 |
| 2,4  | 2,3 | 4,1 2   | 9  | 9       | 9      | 8,1   | 1 | 0 |
| 6,9  | 6,7 | 106,3 2 | 2  | 6,48 2  | 6,47 2 | 63,2  | 1 | 0 |
| 4,1  | 5,4 | 42 2    | 2  | 1,4 2   | 3,8 2  | 66,6  | 1 | 0 |
| 3,8  | 3,3 | 12,5 2  | 0  | 0,9 0   | 1,93 9 | 18,7  | 1 | 0 |
| 4,5  | 5   | 48,3 2  | 2  | 9       | 2      | 45    | 1 | 0 |
| 4,1  | 6,2 | 30 2    | 2  | 2,7 2   | 4,7 2  | 80,9  | 1 | 0 |
| 10,4 | 11  | 320 2   | 2  | 29 2    | 23 2   | 129,8 | 1 | 0 |
| 2,7  | 3,1 | 11,7 2  | 9  | 9       | 2      | 87,5  | 1 | 0 |
| 2,3  | 6   | 14,5 9  | -1 | -1      | 9      | 21,4  | 0 | 0 |
|      |     | 2       | 9  | 0,76 2  | 2,1 0  |       | 0 | 1 |
| 1,1  | 1,8 | 2       | 1  | 9       | 2      | 34,4  | 0 | 0 |
| 2,6  | 4   | 30 2    | 2  | 2,1 2   | 1,1 2  | 19,4  | 0 | 1 |
| 8,2  | 7,2 | 256,8 9 | 9  | 2       | 2      | 195   | 0 | 0 |
| 4    | 5,8 | 55,7 3  | 3  | 3       | 2      | 94,99 | 0 | 0 |
| 5    | 6,5 | 89,4 2  | 9  | 9       | 2      | 95,7  | 0 | 1 |
|      |     | 460 2   | 2  | 2       | 2      | 150,8 | 1 | 0 |
| 2,5  | 3   | 11,25 2 | 2  | 1,38 2  | 1,48 0 |       | 1 | 0 |
| 3,8  | 3,6 | 21,2 2  | 2  | 2       | 2      | 22,7  | 1 | 0 |
| 4,8  | 5,3 | 54,7 2  | 2  | 2       | 3      |       | 0 | 0 |
| 4,7  | 7,3 | 63,5 9  | 2  | 2       | 2      | 59,7  | 0 | 0 |
|      |     | 3       | 9  | 2       | 2      | 87    | 0 | 0 |
| 14   | 10  | 910 9   | 2  | 2,72 2  | 3,8 2  | 329,7 | 0 | 0 |
| 3,6  | 5,3 | 50 2    | 2  | 23 2    | 12 2   | 62,3  | 0 | 1 |
| 7    | 9   | 242,5 3 | 2  | 2       | 2      | 351   | 0 | 1 |
| 2,1  | 2,7 | 4,2 2   | 9  | 9       | 9      | 17    | 1 | 0 |
| 7,3  | 5,5 | 220 2   | 2  | 2       | 2      | 68,9  | 1 | 0 |
|      |     | 1250 2  | 2  | 6,6 2   | 6,47 2 | 60    | 0 | 1 |
|      |     | 2       | 2  | 1,5 2   | 4,7 2  | 22,1  | 0 | 1 |
| 6,3  | 5,2 | 98,3 9  | 2  | 2       | 2      |       | 0 | 0 |
| 6    | 7,2 | 187,9 2 | 1  | 2       | 2      | 54,8  | 0 | 0 |
| 3,6  | 3,9 | 22,4 2  | 9  | 0,66 2  | 1,14 2 | 45,46 | 1 | 0 |
| 3,1  | 3,8 | 16 2    | 9  | 9       | 2      | 23,4  | 1 | 0 |
| 15   | 17  | 2040 2  | 9  | 9       | 2      | 43    | 0 | 1 |
| 13,3 | 14  | 1070 2  | 2  | Page 37 | 2      | 510,5 | 0 | 1 |

|     |      |         |   |        |         |       |   |   |
|-----|------|---------|---|--------|---------|-------|---|---|
| 1,5 | 2    | 2,25 3  | 9 | 0,52 9 | 0,53 9  |       | 0 | 0 |
| 5,8 | 7,7  | 149,6 2 | 9 | 2      | 9       | 14,6  | 0 | 0 |
| 2,8 | 4,1  | 17,22 2 | 2 | 2      | 9       | 17,3  | 1 | 0 |
| 6,3 | 10,5 | 343,9 2 | 2 | 2,29 2 | 15,42 2 | 116,5 | 0 | 1 |
| 4,4 | 4,4  | 64 2    | 2 | 1,28 2 | 2,57 2  | 88,2  | 1 | 0 |
| 8   | 10   | 150 2   | 2 | 4,74 2 | 6,49 2  | 93,3  | 0 | 1 |
| 7   | 9,2  | 283 2   | 2 | 2      | 0       |       | 1 | 0 |
| 3,5 | 3,1  | 19 3    | 2 | 1,04 2 | 2,23 1  | 21,5  | 0 | 0 |
| 6,8 | 6,5  | 44 2    | 2 | 1,76 2 | 1,1 2   | 333,1 | 0 | 0 |
|     |      | 2       | 2 | 6,8 2  | 12,32 2 | 111,6 | 1 | 0 |
|     |      | 2       | 2 | 2      | 2       | 57,1  | 1 | 0 |
| 5,3 | 4,8  | 80 2    | 2 | 2,2 2  | 2,56 2  | 46    | 1 | 0 |
| 5   | 5    | 75 2    | 2 | 2      | 2       | 76    | 1 | 0 |
| 4,9 | 6    | 89,7 3  | 3 | 2      | 2       | 31,1  | 1 | 0 |
| 4   | 6    | 60 2    | 2 | 2,3 2  | 3,1 2   | 13,7  | 0 | 0 |
| 8,2 | 9,7  | 298 3   | 3 | 3      | 2       | 20,1  | 0 | 0 |
| 2,9 | 4,6  | 26 2    | 2 | 1,33 2 | 2,36 2  | 35,5  | 1 | 0 |
| 3,2 | 3,8  | 18 3    | 2 | 1,4 2  | 1,2 3   |       | 1 | 0 |
| 6,6 | 11,2 | 355 2   | 2 | 6,05 2 | 14,48 2 | 60,7  | 0 | 1 |
|     | 2,7  | 10,5 2  | 9 | 0,63 2 | 1,35 9  | 16,2  | 1 | 0 |
| 2,7 | 2,8  | 12,1 2  | 2 | 2,5 2  | 3,4 2   | 75    | 1 | 0 |
| 6,6 | 6,2  | 115 2   | 2 | 6,34 2 | 9,49 2  | 83    | 1 | 0 |
| 3,9 | 4    | 18,7 2  | 2 | 2      | 2       | 39,4  | 1 | 0 |
| 1   | 1,2  | 1,2 9   | 9 | 0,89 9 | 0,47 2  | 48    | 0 | 0 |
| 9   | 12   | 351 3   | 2 | 2      | 2       | 252   | 0 | 1 |
| 8   | 9    | 432 2   | 2 | 2      | 2       | 91,2  | 0 | 1 |
| 5   | 5,5  | 88 2    | 9 | 0,41 9 | 0,47 2  | 124   | 0 | 1 |
| 8   | 8    | 180 2   | 2 | 2      | 2       | 27    | 0 | 0 |
| 4   | 4,8  | 30 2    | 9 | 9      | 2       | 126   | 1 | 0 |
| 1,8 | 2    | 2,5 2   | 2 | 1,4 9  | 0,9 2   | 38,6  | 1 | 0 |
| 6,1 | 5,2  | 68,2 3  | 2 | 3,84 2 | 8,68 2  | 120   | 0 | 0 |
| 3,1 | 3,6  | 22,3 2  | 2 | 1,8 2  | 5 2     | 27,5  | 0 | 0 |
| 2,1 | 2,2  | 7,6 2   | 9 | 0,43 9 | 0,85    |       | 1 | 0 |
| 2   | 4,2  | 15,12 3 | 2 | 2      |         |       | 1 | 0 |
|     |      | 2       | 2 | 2,58 2 | 3,61 2  | 68,7  | 0 | 0 |

| LKSCHW | FIEBER | REDAZ | GEWICHT | SCHMERZ | ATAXIE | DURCHF | QUKOMP | QUINK | HORNER | HYPERTONIE | BRILLENHÄM |
|--------|--------|-------|---------|---------|--------|--------|--------|-------|--------|------------|------------|
| 0      | 0      | 0     | 0       | 0       | 0      | 0      | 0      | 0     | 0      | 0          | 0          |
| 0      | 0      | 0     | 0       | 0       | 0      | 0      | 0      | 0     | 0      | 0          | 0          |
| 0      | 0      | 0     | 0       | 0       | 1      | 0      | 0      | 0     | 0      | 0          | 0          |
| 0      | 0      | 0     | 0       | 0       | 0      | 0      | 0      | 0     | 0      | 0          | 0          |
| 0      | 0      | 0     | 0       | 0       | 0      | 0      | 0      | 0     | 0      | 0          | 0          |
| 0      | 0      | 0     | 0       | 0       | 0      | 0      | 0      | 0     | 0      | 0          | 0          |
| 0      | 1      | 0     | 0       | 0       | 1      | 0      | 0      | 0     | 0      | 0          | 0          |
| 0      | 0      | 0     | 0       | 0       | 0      | 0      | 0      | 0     | 0      | 0          | 0          |
| 0      | 0      | 0     | 0       | 0       | 0      | 0      | 0      | 0     | 0      | 0          | 0          |
| 0      | 0      | 0     | 0       | 0       | 1      | 0      | 0      | 0     | 0      | 0          | 0          |
| 0      | 0      | 0     | 0       | 0       | 0      | 0      | 0      | 0     | 0      | 0          | 0          |
| 0      | 0      | 0     | 0       | 0       | 0      | 0      | 0      | 0     | 0      | 0          | 0          |
| 0      | 0      | 0     | 0       | 0       | 0      | 0      | 0      | 0     | 0      | 0          | 0          |
| 0      | 0      | 0     | 0       | 0       | 0      | 0      | 0      | 0     | 0      | 0          | 0          |
| 0      | 0      | 0     | 0       | 0       | 1      | 0      | 0      | 0     | 0      | 0          | 0          |
| 0      | 0      | 0     | 0       | 0       | 0      | 0      | 0      | 0     | 0      | 0          | 0          |
| 0      | 0      | 0     | 0       | 0       | 0      | 0      | 0      | 0     | 0      | 0          | 0          |
| 0      | 0      | 0     | 0       | 0       | 0      | 0      | 0      | 0     | 0      | 0          | 0          |
| 0      | 0      | 0     | 0       | 0       | 0      | 0      | 0      | 0     | 0      | 0          | 0          |
| 0      | 0      | 0     | 0       | 0       | 0      | 0      | 0      | 0     | 0      | 0          | 0          |
| 0      | 0      | 0     | 0       | 0       | 0      | 0      | 0      | 0     | 0      | 0          | 0          |
| 0      | 0      | 0     | 0       | 0       | 0      | 0      | 0      | 0     | 0      | 0          | 0          |
| 0      | 0      | 0     | 0       | 0       | 1      | 0      | 0      | 0     | 0      | 0          | 0          |
| 0      | 0      | 0     | 0       | 0       | 0      | 0      | 0      | 0     | 0      | 0          | 0          |
| 0      | 0      | 0     | 0       | 0       | 0      | 0      | 0      | 0     | 0      | 0          | 0          |
| 0      | 0      | 0     | 0       | 0       | 1      | 0      | 0      | 0     | 0      | 0          | 0          |
| 0      | 0      | 0     | 0       | 0       | 1      | 0      | 0      | 0     | 0      | 0          | 0          |
| 0      | 0      | 0     | 0       | 1       | 1      | 0      | 0      | 0     | 0      | 0          | 0          |
| 0      | 0      | 0     | 0       | 0       | 1      | 0      | 0      | 0     | 0      | 0          | 0          |
| 0      | 1      | 0     | 0       | 0       | 1      | 0      | 0      | 0     | 0      | 0          | 0          |
| 0      | 0      | 0     | 0       | 0       | 0      | 0      | 0      | 0     | 0      | 0          | 0          |
| 0      | 0      | 0     | 0       | 0       | 1      | 0      | 0      | 0     | 0      | 0          | 0          |
| 0      | 1      | 0     | 0       | 0       | 0      | 0      | 0      | 0     | 0      | 0          | 0          |
| 1      | 0      | 0     | 0       | 0       | 0      | 0      | 0      | 0     | 0      | 0          | 0          |



|   |   |   |   |   |   |   |   |   |   |   |   |   |
|---|---|---|---|---|---|---|---|---|---|---|---|---|
| 0 | 0 | 1 | 1 | 0 | 0 | 0 | 0 | 0 | 0 | 0 | 0 | 0 |
| 0 | 0 | 0 | 0 | 0 | 0 | 0 | 0 | 0 | 0 | 0 | 0 | 0 |
| 0 | 0 | 0 | 0 | 0 | 0 | 0 | 0 | 0 | 0 | 0 | 0 | 0 |
| 0 | 0 | 0 | 0 | 1 | 0 | 0 | 0 | 0 | 0 | 0 | 0 | 0 |
| 0 | 1 | 0 | 0 | 1 | 0 | 0 | 0 | 0 | 0 | 0 | 0 | 0 |
| 0 | 0 | 0 | 0 | 1 | 0 | 0 | 0 | 0 | 0 | 1 | 0 | 0 |
| 0 | 0 | 0 | 0 | 1 | 0 | 0 | 0 | 0 | 0 | 0 | 0 | 0 |
| 0 | 0 | 1 | 0 | 1 | 0 | 0 | 0 | 0 | 0 | 0 | 0 | 0 |
| 0 | 0 | 0 | 0 | 1 | 0 | 0 | 0 | 0 | 0 | 0 | 0 | 0 |
| 0 | 0 | 0 | 0 | 1 | 0 | 0 | 0 | 0 | 0 | 0 | 0 | 0 |
| 0 | 0 | 0 | 0 | 0 | 0 | 0 | 0 | 0 | 0 | 0 | 0 | 0 |
| 0 | 0 | 0 | 0 | 0 | 0 | 0 | 0 | 0 | 0 | 0 | 0 | 0 |
| 0 | 0 | 0 | 0 | 0 | 0 | 0 | 0 | 0 | 0 | 0 | 0 | 0 |
| 0 | 0 | 0 | 0 | 0 | 0 | 0 | 0 | 0 | 0 | 0 | 0 | 0 |
| 0 | 0 | 1 | 0 | 0 | 0 | 0 | 0 | 0 | 0 | 0 | 0 | 0 |
| 0 | 0 | 0 | 0 | 0 | 0 | 0 | 0 | 0 | 0 | 0 | 0 | 0 |
| 0 | 0 | 0 | 0 | 0 | 0 | 0 | 0 | 0 | 0 | 0 | 0 | 0 |
| 0 | 0 | 0 | 0 | 0 | 0 | 0 | 0 | 0 | 0 | 0 | 0 | 0 |
| 0 | 0 | 0 | 0 | 0 | 0 | 0 | 0 | 0 | 0 | 0 | 0 | 0 |
| 0 | 0 | 0 | 0 | 1 | 1 | 0 | 0 | 0 | 0 | 0 | 0 | 0 |
| 0 | 0 | 0 | 0 | 0 | 0 | 0 | 0 | 0 | 0 | 0 | 0 | 0 |
| 0 | 0 | 0 | 0 | 0 | 0 | 0 | 0 | 0 | 0 | 0 | 0 | 0 |
| 0 | 0 | 1 | 0 | 0 | 1 | 0 | 0 | 0 | 0 | 0 | 0 | 0 |
| 0 | 0 | 0 | 0 | 0 | 0 | 0 | 0 | 0 | 0 | 0 | 0 | 0 |
| 0 | 0 | 0 | 0 | 0 | 0 | 0 | 0 | 0 | 0 | 0 | 0 | 0 |
| 0 | 1 | 0 | 0 | 0 | 0 | 0 | 0 | 0 | 0 | 0 | 0 | 0 |

































| PATH_FRAK | ANZSYMP | VORER_SYNDR_NEIN |
|-----------|---------|------------------|
| 0         | 0       | 1                |
| 0         | 0       | 1                |
| 0         | 1       | 1                |
| 0         | 1       | 1                |
| 0         | 0       | 0                |
| 0         | 0       | 0                |
| 0         | 3       | 1                |
| 0         | 1       | 1                |
| 0         | 0       | 1                |
| 0         | 1       | 0                |
| 0         | 0       | 1                |
| 0         | 0       | 1                |
| 0         | 0       | 1                |
| 0         | 1       | 1                |
| 0         | 0       | 0                |
| 0         | 2       | 1                |
| 0         | 0       | 1                |
| 0         | 0       | 1                |
| 0         | 0       | 1                |
| 0         | 0       | 1                |
| 0         | 1       | 1                |
| 0         | 0       | 1                |
| 0         | 2       | 1                |
| 0         | 0       | 0                |
| 0         | 0       | 0                |
| 0         | 1       | 1                |
| 0         | 1       | 1                |
| 0         | 0       | 1                |
| 0         | 0       | 1                |
| 0         | 2       | 1                |
| 0         | 1       | 1                |
| 0         | 3       | 1                |
| 0         | 1       | 1                |
| 0         | 3       | 1                |
| 0         | 0       | 1                |
| 0         | 1       | 1                |
| 0         | 1       | 0                |
| 0         | 2       | 0                |
| 0         | Page 58 | 1                |

|   |         |   |
|---|---------|---|
| 0 | 0       | 1 |
| 0 | 0       | 1 |
| 0 | 0       | 1 |
| 0 | 0       | 0 |
| 0 | 1       | 0 |
| 0 | 2       | 1 |
| 0 | 1       | 1 |
| 0 | 2       | 1 |
| 0 | 1       | 1 |
| 0 | 1       | 1 |
| 0 | 0       | 0 |
| 0 | 1       | 1 |
| 0 | 1       | 1 |
| 0 | 0       | 1 |
| 0 | 0       | 1 |
| 0 | 2       | 1 |
| 0 | 0       | 1 |
| 0 | 3       | 1 |
| 0 | 1       | 1 |
| 0 | 1       | 1 |
| 0 | 1       | 0 |
| 0 | 0       | 1 |
| 0 | 0       | 0 |
| 0 | 2       | 1 |
| 0 | 0       | 0 |
| 0 | 0       | 1 |
| 0 | 2       | 1 |
| 0 | 1       | 1 |
| 0 | 0       | 1 |
| 0 | 1       | 1 |
| 0 | 0       | 1 |
| 0 | 1       | 1 |
| 0 | 0       | 1 |
| 0 | 2       | 1 |
| 0 | 1       | 1 |
| 0 | 0       | 1 |
| 0 | Page 59 | 1 |

|   |         |   |
|---|---------|---|
| 0 | 3       | 1 |
| 0 | 0       | 0 |
| 0 | 1       | 0 |
| 0 | 1       | 1 |
| 0 | 2       | 1 |
| 0 | 2       | 1 |
| 0 | 2       | 0 |
| 0 | 1       | 1 |
| 0 | 2       | 1 |
| 0 | 1       | 1 |
| 0 | 0       | 1 |
| 0 | 1       | 0 |
| 0 | 2       | 1 |
| 0 | 1       | 0 |
| 0 | 1       | 1 |
| 0 | 2       | 1 |
| 0 | 1       | 1 |
| 0 | 1       | 1 |
| 0 | 0       | 0 |
| 0 | 1       | 1 |
| 0 | 1       | 1 |
| 0 | 0       | 0 |
| 0 | 1       | 1 |
| 0 | 0       | 1 |
| 0 | 0       | 1 |
| 0 | 2       | 1 |
| 0 | 2       | 0 |
| 0 | 1       | 1 |
| 0 | 1       | 1 |
| 0 | 0       | 0 |
| 0 | 1       | 1 |
| 0 | 1       | 1 |
| 0 | 2       | 1 |
| 0 | 1       | 1 |
| 0 | 0       | 0 |
| 0 | 0       | 1 |
| 0 | 0       | 1 |
| 0 | 3       | 1 |
| 0 | 1       | 1 |
| 0 | 2       | 1 |
| 0 | Page 60 | 1 |

|   |   |   |
|---|---|---|
| 0 | 1 | 0 |
| 0 | 0 | 1 |
| 0 | 0 | 1 |
| 0 | 1 | 1 |
| 0 | 0 | 1 |
| 0 | 0 | 1 |
| 0 | 1 | 1 |
| 0 | 2 | 0 |
| 0 | 0 | 1 |
| 0 | 1 | 1 |
| 0 | 0 | 0 |
| 0 | 1 | 1 |
| 0 | 0 | 1 |
| 0 | 2 | 1 |
| 0 | 0 | 0 |
| 0 | 1 | 1 |
| 0 | 3 | 0 |
| 0 | 1 | 0 |
| 0 | 3 | 0 |
| 0 | 2 | 1 |
| 0 | 0 | 1 |
| 0 | 2 | 1 |
| 0 | 1 | 1 |
| 0 | 4 | 1 |
| 0 | 0 | 1 |
| 0 | 0 | 0 |
| 0 | 1 | 1 |
| 0 | 2 | 1 |
| 0 | 1 | 1 |
| 0 | 0 | 1 |
| 0 | 1 | 1 |
| 0 | 3 | 1 |
| 0 | 1 | 1 |
| 0 | 1 | 0 |
| 0 | 0 | 1 |
| 0 | 0 | 1 |
| 0 | 0 | 1 |
| 0 | 1 | 1 |
| 0 | 1 | 1 |
| 0 | 0 | 0 |
| 0 | 0 | 0 |

|   |         |   |
|---|---------|---|
| 0 | 1       | 1 |
| 0 | 1       | 0 |
| 0 | 0       | 1 |
| 0 | 0       | 0 |
| 0 | 1       | 1 |
| 0 | 0       | 1 |
| 0 | 0       | 1 |
| 0 | 0       | 1 |
| 0 | 3       | 1 |
| 0 | 1       | 1 |
| 0 | 2       | 1 |
| 0 | 0       | 1 |
| 0 | 1       | 1 |
| 0 | 0       | 0 |
| 0 | 0       | 1 |
| 0 | 1       | 1 |
| 0 | 1       | 0 |
| 0 | 0       | 0 |
| 0 | 0       | 1 |
| 0 | 1       | 1 |
| 0 | 0       | 0 |
| 0 | 1       | 1 |
| 0 | 0       | 1 |
| 0 | 2       | 1 |
| 0 | 0       | 1 |
| 0 | 1       | 1 |
| 0 | 0       | 1 |
| 0 | 0       | 1 |
| 0 | 2       | 1 |
| 0 | 1       | 0 |
| 0 | 0       | 0 |
| 0 | 0       | 1 |
| 0 | 0       | 1 |
| 0 | 0       | 1 |
| 0 | 1       | 1 |
| 0 | 0       | 1 |
| 0 | 2       | 1 |
| 0 | 2       | 1 |
| 0 | 0       | 0 |
| 0 | 0       | 1 |
| 0 | 1       | 1 |
| 0 | Page 62 | 1 |

|   |         |   |
|---|---------|---|
| 0 | 0       | 1 |
| 0 | 1       | 1 |
| 0 | 4       | 1 |
| 0 | 1       | 1 |
| 0 | 0       | 1 |
| 0 | 0       | 1 |
| 0 | 1       | 1 |
| 0 | 1       | 1 |
| 0 | 1       | 0 |
| 0 | 3       | 1 |
| 0 | 1       | 1 |
| 0 | 2       | 1 |
| 0 | 0       | 1 |
| 0 | 1       | 1 |
| 0 | 0       | 1 |
| 0 | 0       | 1 |
| 0 | 1       | 1 |
| 0 | 0       | 0 |
| 0 | 0       | 0 |
| 0 | 1       | 1 |
| 0 | 0       | 1 |
| 0 | 0       | 1 |
| 0 | 2       | 0 |
| 0 | 1       | 1 |
| 0 | 0       | 1 |
| 0 | 0       | 1 |
| 0 | 0       | 1 |
| 0 | 0       | 1 |
| 0 | 4       | 0 |
| 0 | 1       | 1 |
| 0 | 1       | 1 |
| 0 | 2       | 1 |
| 0 | 2       | 1 |
| 0 | 2       | 1 |
| 0 | 1       | 0 |
| 0 | 2       | 1 |
| 0 | 1       | 1 |
| 0 | 3       | 1 |
| 0 | 1       | 1 |
| 0 | 2       | 1 |
| 0 | 1       | 1 |
| 0 | Page 63 | 1 |

|   |         |   |
|---|---------|---|
| 0 | 0       | 1 |
| 0 | 0       | 0 |
| 0 | 1       | 1 |
| 0 | 3       | 1 |
| 0 | 3       | 1 |
| 0 | 0       | 1 |
| 0 | 0       | 1 |
| 0 | 0       | 1 |
| 0 | 0       | 1 |
| 0 | 0       | 0 |
| 0 | 2       | 1 |
| 0 | 0       | 1 |
| 0 | 1       | 1 |
| 0 | 0       | 1 |
| 0 | 0       | 1 |
| 0 | 0       | 0 |
| 0 | 0       | 0 |
| 0 | 1       | 1 |
| 0 | 0       | 1 |
| 0 | 0       | 1 |
| 0 | 0       | 1 |
| 0 | 0       | 1 |
| 0 | 0       | 1 |
| 0 | 0       | 0 |
| 0 | 3       | 1 |
| 0 | 0       | 1 |
| 0 | 0       | 1 |
| 0 | 0       | 1 |
| 0 | 0       | 1 |
| 0 | 0       | 1 |
| 0 | 0       | 1 |
| 0 | 0       | 1 |
| 0 | 0       | 1 |
| 0 | 0       | 1 |
| 0 | 0       | 1 |
| 0 | 0       | 1 |
| 0 | 0       | 1 |
| 0 | 1       | 1 |
| 0 | 1       | 1 |
| 0 | 0       | 1 |
| 0 | 0       | 1 |
| 0 | 0       | 1 |
| 0 | 0       | 1 |
| 0 | 0       | 1 |
| 0 | 0       | 1 |
| 0 | 1       | 1 |
| 0 | 0       | 1 |
| 0 | 1       | 1 |
| 0 | 2       | 1 |
| 0 | 0       | 1 |
| 0 | 4       | 1 |
| 0 | Page 64 | 1 |

|   |         |   |
|---|---------|---|
| 1 | 5       | 1 |
| 0 | 1       | 1 |
| 0 | 2       | 1 |
| 0 | 0       | 1 |
| 0 | 5       | 1 |
| 0 | 0       | 1 |
| 0 | 3       | 1 |
| 0 | 0       | 1 |
| 0 | 0       | 1 |
| 0 | 0       | 1 |
| 0 | 0       | 0 |
| 0 | 0       | 1 |
| 0 | 0       | 1 |
| 0 | 0       | 1 |
| 0 | 0       | 1 |
| 0 | 0       | 0 |
| 0 | 4       | 1 |
| 0 | 0       | 1 |
| 0 | 0       | 1 |
| 0 | 0       | 1 |
| 0 | 0       | 0 |
| 0 | 1       | 1 |
| 0 | 1       | 1 |
| 0 | 0       | 1 |
| 0 | 1       | 1 |
| 0 | 3       | 1 |
| 0 | 0       | 1 |
| 0 | 1       | 1 |
| 0 | 4       | 1 |
| 0 | 0       | 0 |
| 0 | 3       | 1 |
| 0 | 0       | 1 |
| 0 | 3       | 0 |
| 0 | 0       | 1 |
| 0 | 1       | 1 |
| 0 | 0       | 1 |
| 0 | 1       | 1 |
| 0 | 0       | 1 |
| 0 | 3       | 1 |
| 0 | 1       | 1 |
| 0 | 0       | 1 |
| 0 | 0       | 1 |
| 0 | 1       | 1 |
| 0 | 0       | 1 |
| 0 | Page 65 | 1 |

|   |         |   |
|---|---------|---|
| 0 | 3       | 0 |
| 0 | 0       | 1 |
| 0 | 3       | 1 |
| 0 | 0       | 1 |
| 0 | 0       | 1 |
| 0 | 0       | 1 |
| 0 | 0       | 1 |
| 0 | 3       | 0 |
| 0 | 0       | 1 |
| 0 | 3       | 1 |
| 0 | 0       | 1 |
| 0 | 3       | 0 |
| 0 | 0       | 1 |
| 0 | 1       | 1 |
| 0 | 5       | 0 |
| 0 | 0       | 1 |
| 0 | 1       | 1 |
| 0 | 0       | 1 |
| 0 | 3       | 1 |
| 0 | 0       | 1 |
| 0 | 0       | 1 |
| 0 | 0       | 0 |
| 0 | 0       | 1 |
| 0 | 1       | 0 |
| 0 | 0       | 1 |
| 0 | 0       | 0 |
| 0 | 1       | 1 |
| 0 | 0       | 1 |
| 0 | 0       | 0 |
| 0 | 3       | 1 |
| 0 | 1       | 1 |
| 0 | 2       | 1 |
| 0 | 0       | 0 |
| 0 | 0       | 0 |
| 0 | 1       | 0 |
| 0 | 2       | 1 |
| 0 | 0       | 0 |
| 0 | 0       | 1 |
| 0 | 4       | 1 |
| 0 | 0       | 1 |
| 0 | 0       | 1 |
| 0 | 3       | 1 |
| 0 | Page 66 | 1 |

|   |         |   |
|---|---------|---|
| 0 | 3       | 1 |
| 0 | 0       | 1 |
| 0 | 0       | 1 |
| 0 | 1       | 1 |
| 0 | 0       | 1 |
| 0 | 3       | 1 |
| 0 | 4       | 1 |
| 0 | 1       | 1 |
| 0 | 1       | 1 |
| 0 | 0       | 1 |
| 0 | 0       | 1 |
| 0 | 3       | 1 |
| 0 | 3       | 1 |
| 0 | 1       | 1 |
| 0 | 0       | 1 |
| 0 | 1       | 1 |
| 0 | 1       | 1 |
| 0 | 2       | 1 |
| 0 | 3       | 1 |
| 0 | 0       | 1 |
| 0 | 0       | 1 |
| 0 | 0       | 1 |
| 0 | 0       | 1 |
| 0 | 0       | 1 |
| 0 | 0       | 1 |
| 0 | 0       | 1 |
| 0 | 0       | 1 |
| 0 | 0       | 1 |
| 0 | 0       | 1 |
| 0 | 0       | 1 |
| 0 | 2       | 1 |
| 0 | 3       | 1 |
| 0 | 0       | 1 |
| 0 | 1       | 1 |
| 0 | 2       | 1 |
| 0 | 0       | 0 |
| 0 | 0       | 0 |
| 0 | 0       | 1 |
| 0 | 1       | 0 |
| 0 | 1       | 1 |
| 0 | 4       | 1 |
| 0 | 4       | 1 |
| 0 | 0       | 1 |
| 0 | 2       | 1 |
| 0 | 0       | 1 |
| 0 | Page 67 | 1 |

|   |         |   |
|---|---------|---|
| 0 | 2       | 1 |
| 0 | 0       | 1 |
| 0 | 2       | 1 |
| 0 | 0       | 1 |
| 0 | 1       | 1 |
| 0 | 0       | 1 |
| 0 | 4       | 1 |
| 0 | 2       | 1 |
| 0 | 1       | 1 |
| 0 | 0       | 1 |
| 0 | 4       | 1 |
| 0 | 2       | 1 |
| 0 | 1       | 1 |
| 0 | 4       | 1 |
| 0 | 0       | 0 |
| 0 | 1       | 1 |
| 0 | 1       | 0 |
| 0 | 1       | 1 |
| 0 | 0       | 1 |
| 0 | 3       | 1 |
| 0 | 2       | 1 |
| 0 | 1       | 1 |
| 0 | 0       | 1 |
| 0 | 0       | 1 |
| 0 | 2       | 1 |
| 0 | 2       | 1 |
| 0 | 3       | 1 |
| 0 | 0       | 1 |
| 0 | 0       | 1 |
| 0 | 2       | 0 |
| 0 | 1       | 1 |
| 0 | 1       | 1 |
| 0 | 2       | 0 |
| 0 | 0       | 1 |
| 0 | 0       | 1 |
| 0 | 3       | 1 |
| 0 | 0       | 1 |
| 0 | 0       | 1 |
| 0 | 0       | 0 |
| 0 | 1       | 1 |
| 0 | 0       | 0 |
| 0 | 0       | 1 |
| 0 | Page 68 | 1 |

|   |         |   |
|---|---------|---|
| 0 | 0       | 0 |
| 0 | 0       | 1 |
| 0 | 1       | 0 |
| 0 | 2       | 1 |
| 0 | 0       | 1 |
| 0 | 1       | 1 |
| 0 | 0       | 1 |
| 0 | 0       | 1 |
| 0 | 0       | 1 |
| 0 | 0       | 1 |
| 0 | 0       | 1 |
| 0 | 1       | 1 |
| 0 | 0       | 1 |
| 0 | 2       | 1 |
| 0 | 1       | 0 |
| 0 | 3       | 1 |
| 0 | 0       | 1 |
| 0 | 4       | 1 |
| 0 | 0       | 1 |
| 0 | 1       | 1 |
| 0 | 0       | 1 |
| 0 | 3       | 0 |
| 0 |         | 1 |
| 0 | 0       | 1 |
| 0 | 3       | 1 |
| 0 | 3       | 1 |
| 0 | 1       | 1 |
| 0 | 0       | 1 |
| 0 | 0       | 0 |
| 0 | 4       | 1 |
| 0 | 0       | 1 |
| 0 | 0       | 0 |
| 0 | 2       | 1 |
| 0 | 3       | 1 |
| 0 | 0       | 1 |
| 0 | 4       | 1 |
| 0 | 2       | 1 |
| 0 | 0       | 1 |
| 0 | 0       | 1 |
| 0 | 0       | 1 |
| 0 | 0       | 1 |
| 0 | Page 69 | 1 |





|   |         |   |
|---|---------|---|
| 0 | 4       | 1 |
| 0 | 0       | 1 |
| 0 | 0       | 1 |
| 0 | 3       | 1 |
| 0 | 1       | 0 |
| 0 | 0       | 0 |
| 0 | 1       | 1 |
| 0 | 0       | 1 |
| 0 | 0       | 1 |
| 0 | 1       | 1 |
| 0 | 0       | 1 |
| 0 | 0       | 1 |
| 0 | 0       | 1 |
| 0 | 0       | 1 |
| 0 | 0       | 1 |
| 0 | 0       | 1 |
| 0 | 0       | 1 |
| 0 | 2       | 1 |
| 0 | 0       | 1 |
| 0 | 1       | 1 |
| 0 | 0       | 1 |
| 0 | 1       | 1 |
| 0 | 1       | 1 |
| 0 | 0       | 1 |
| 0 | 0       | 1 |
| 0 | 1       | 1 |
| 0 | 0       | 1 |
| 0 | 1       | 1 |
| 0 | 0       | 1 |
| 0 | 3       | 1 |
| 0 | 0       | 1 |
| 0 | 6       | 1 |
| 0 | 2       | 1 |
| 0 | 0       | 1 |
| 0 | 1       | 0 |
| 0 | 1       | 1 |
| 0 | 0       | 0 |
| 0 | 0       | 0 |
| 0 | 2       | 1 |
| 0 | 0       | 1 |
| 0 | 2       | 1 |
| 0 | 3       | 1 |
| 0 | 0       | 1 |
| 0 | 0       | 1 |
| 0 | Page 72 | 0 |

|   |         |   |
|---|---------|---|
| 0 | 1       | 1 |
| 0 | 3       | 1 |
| 0 | 1       | 1 |
| 0 | 0       | 1 |
| 0 | 1       | 1 |
| 0 | 0       | 1 |
| 0 | 0       | 0 |
| 0 | 0       | 0 |
| 0 | 0       | 1 |
| 0 | 0       | 1 |
| 0 | 0       | 1 |
| 0 | 0       | 1 |
| 0 | 0       | 0 |
| 0 | 0       | 1 |
| 0 | 0       | 0 |
| 0 | 3       | 1 |
| 0 | 1       | 1 |
| 0 | 0       | 1 |
| 0 | 0       | 1 |
| 0 | 1       | 1 |
| 0 | 1       | 1 |
| 0 | 2       | 1 |
| 0 | 0       | 1 |
| 0 | 1       | 1 |
| 0 | 1       | 1 |
| 0 | 2       | 1 |
| 0 | 0       | 1 |
| 0 | 4       | 1 |
| 0 | 5       | 1 |
| 0 | 0       | 1 |
| 0 | 1       | 1 |
| 0 | 1       | 1 |
| 0 | 0       | 1 |
| 0 | 3       | 1 |
| 0 | 0       | 1 |
| 0 | 0       | 1 |
| 0 | 0       | 1 |
| 0 | 3       | 1 |
| 0 | 0       | 1 |
| 0 | 0       | 1 |
| 0 | 1       | 0 |
| 0 | 0       | 1 |
| 0 | Page 73 | 1 |

|   |         |   |
|---|---------|---|
| 0 | 3       | 1 |
| 0 | 1       | 1 |
| 0 | 0       | 1 |
| 0 | 0       | 1 |
| 0 | 4       | 1 |
| 0 | 2       | 1 |
| 0 | 0       | 1 |
| 0 | 0       | 0 |
| 0 | 0       | 1 |
| 0 | 0       | 0 |
| 0 | 0       | 1 |
| 0 | 0       | 1 |
| 0 | 1       | 1 |
| 0 | 0       | 1 |
| 0 | 0       | 1 |
| 0 | 0       | 1 |
| 0 | 3       | 1 |
| 0 | 2       | 1 |
| 0 | 3       | 1 |
| 0 | 1       | 1 |
| 0 | 0       | 0 |
| 0 | 4       | 1 |
| 0 | 0       | 1 |
| 0 | 4       | 1 |
| 0 | 0       | 1 |
| 0 | 3       | 1 |
| 0 | 0       | 1 |
| 0 | 2       | 1 |
| 0 | 1       | 1 |
| 0 | 3       | 1 |
| 0 | 4       | 1 |
| 0 | 0       | 1 |
| 0 | 3       | 1 |
| 0 | 5       | 0 |
| 0 | 2       | 1 |
| 0 | 4       | 1 |
| 0 | 3       | 1 |
| 0 | 2       | 1 |
| 0 | 2       | 1 |
| 0 | 0       | 1 |
| 0 | 0       | 1 |
| 0 | Page 74 | 0 |

|   |         |   |
|---|---------|---|
| 0 | 0       | 1 |
| 0 | 3       | 1 |
| 0 | 2       | 1 |
| 0 | 0       | 1 |
| 0 | 1       | 1 |
| 0 | 0       | 1 |
| 0 | 0       | 1 |
| 0 | 0       | 1 |
| 0 | 0       | 1 |
| 0 | 0       | 1 |
| 0 | 0       | 1 |
| 0 | 0       | 1 |
| 0 | 0       | 1 |
| 0 | 0       | 1 |
| 0 | 0       | 1 |
| 0 | 0       | 1 |
| 0 | 0       | 1 |
| 0 | 0       | 0 |
| 0 | 3       | 1 |
| 0 | 0       | 0 |
| 0 | 2       | 1 |
| 0 | 1       | 1 |
| 0 | 2       | 1 |
| 0 | 1       | 1 |
| 0 | 3       | 1 |
| 0 | 2       | 1 |
| 0 | 0       | 1 |
| 0 | 0       | 1 |
| 0 | 0       | 1 |
| 0 | 2       | 1 |
| 0 | 2       | 1 |
| 0 | 1       | 1 |
| 0 | 2       | 1 |
| 0 | 0       | 1 |
| 0 | 2       | 1 |
| 0 | 0       | 1 |
| 0 | 0       | 1 |
| 0 | 6       | 0 |
| 0 | 1       | 1 |
| 0 | 2       | 1 |
| 0 | 1       | 1 |
| 0 | 0       | 0 |
| 0 | 0       | 1 |
| 0 | 1       | 1 |
| 0 | Page 75 | 1 |

|   |   |   |
|---|---|---|
| 0 | 2 | 1 |
| 0 | 3 | 0 |
| 0 | 0 | 1 |
| 0 | 3 | 0 |
| 0 | 0 | 1 |
| 0 | 1 | 1 |
| 0 | 0 | 1 |
| 0 | 0 | 0 |
| 0 | 1 | 1 |
| 0 | 0 | 1 |
| 0 | 0 | 1 |
| 0 | 0 | 1 |
| 0 | 1 | 1 |
| 0 | 3 | 1 |
| 0 | 1 | 1 |
| 0 | 0 | 0 |
| 0 | 0 | 1 |
| 0 | 1 | 0 |
| 0 | 0 | 1 |
| 0 | 0 | 0 |
| 0 | 0 | 1 |
| 0 | 0 | 1 |
| 0 | 1 | 1 |
| 0 | 2 | 1 |
| 0 | 1 | 1 |
| 0 | 2 | 1 |
| 0 | 2 | 1 |
| 0 | 0 | 1 |
| 0 | 0 | 1 |
| 0 | 5 | 1 |
| 0 | 2 | 1 |
| 0 | 0 | 1 |
| 0 | 0 | 1 |
| 0 | 1 | 1 |
